# Supplementary material for: Protic Processes in an Extended Pyrazinacene: The Case of Dihydrotetradecaazaheptacene
Source: MDPI journal article supplement (doi:10.3390/molecules29102407), 2024-05-20
Supplement: s1 [file s1]

**Supplementary Information**

**Protic Processes in an Extended Pyrazinacene: The Case of  
Dihydrotetradecaazaheptacene**

Aël Cador, Samia Kahlal, Gary J. Richards, Jean-François Halet,\* and  
Jonathan P. Hill\*

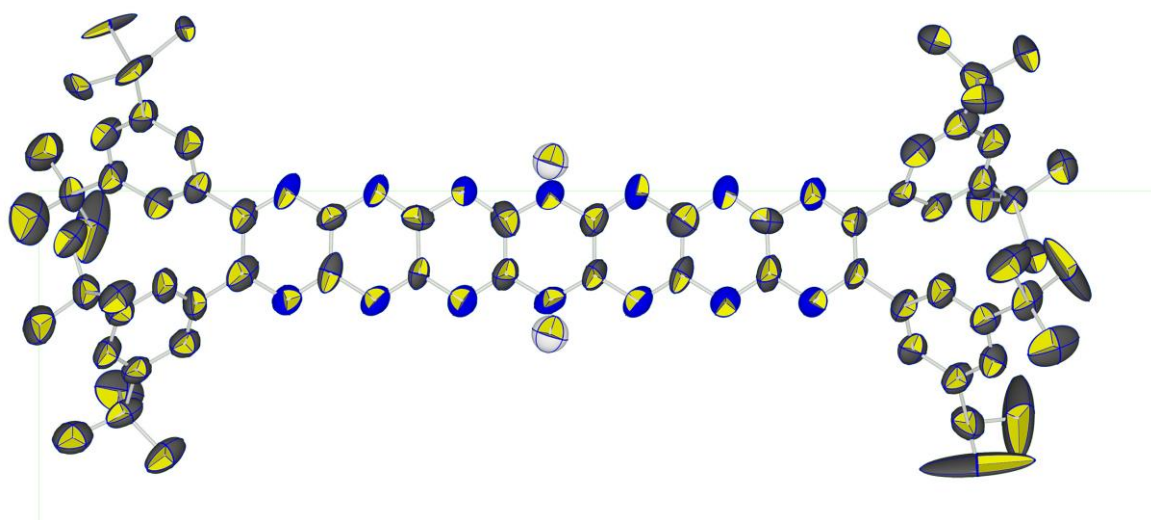

**Figure S1.** Thermal ellipsoid diagram (50 % probability level) of **tBu<sub>8</sub>Ph<sub>4</sub>H<sub>2</sub>N<sub>14</sub>HEPT** reveals highly disordered t-butyl groups attached to a relatively well ordered N<sub>14</sub>-pyrazinacene core.

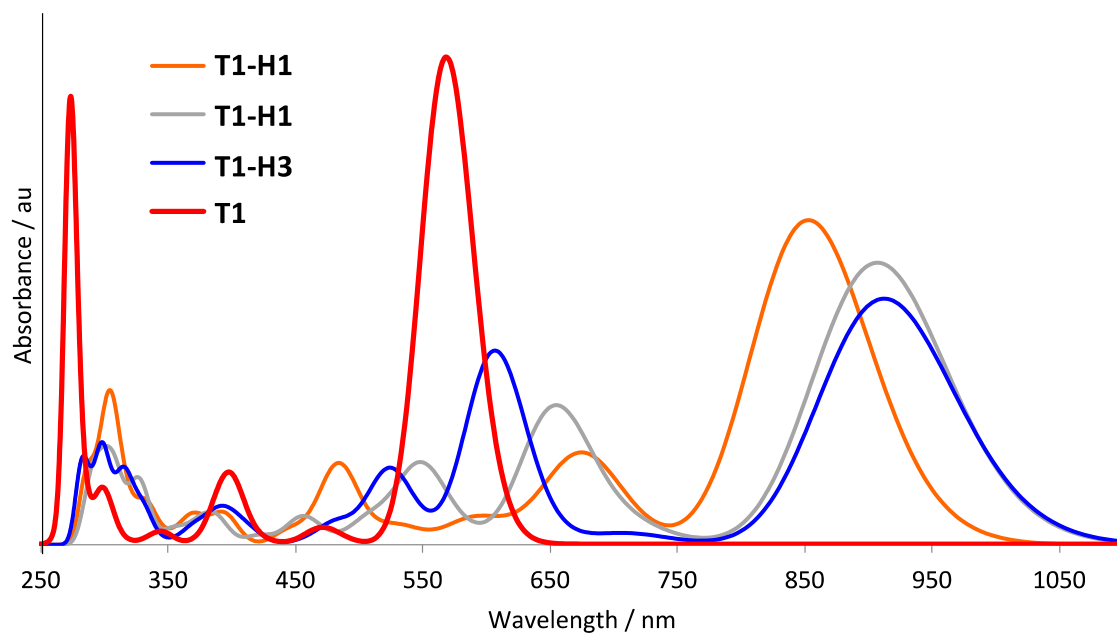

**Figure S2.** Calculated electronic absorption spectra for tautomer **T1** and the monoprotinated tautomers **T1-H1**, **T1-H2**, and **T1-H3**.

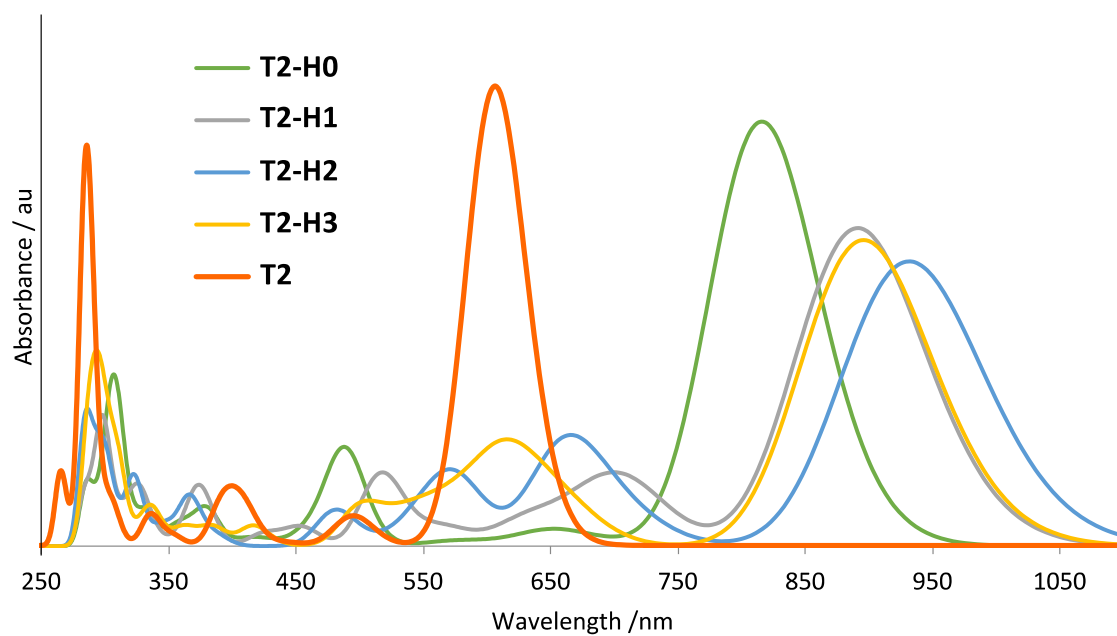

**Figure S3.** Calculated electronic absorption spectra for tautomer **T2** and the monoprotinated tautomers **T2-H0**, **T2-H1**, **T2-H2**, and **T2-H3**.
