# Supplementary material for: Protic Processes in an Extended Pyrazinacene: The Case of Dihydrotetradecaazaheptacene
Source: Molecules. 2024 May 20;29(10):2407. doi: 10.3390/molecules29102407 (PMC11124472; doi:10.3390/molecules29102407)
Supplement: Supplementary file 1 [file molecules-29-02407-s001.zip › Opt_N14_Molecules.mol]

N14Ph4_B3LYP_Def2_TZVP_-2H_-2_TDDFT_Root2.mol
@<TRIPOS>MOLECULE
 DA excited state 2 (Ph4N14HEPT,-2)
    74     84      1
 SMALL
 NO_CHARGES
 ****
 ****
@<TRIPOS>ATOM
     1  C    -9.3061     2.8325     0.2385  C.2   1 RES1    0.0000
     2  C    -9.2383     1.4677     0.5549  C.2   1 RES1    0.0000
     3  C   -10.2905     0.9132     1.2956  C.2   1 RES1    0.0000
     4  C   -11.3789     1.6849     1.6807  C.2   1 RES1    0.0000
     5  C   -11.4457     3.0315     1.3355  C.2   1 RES1    0.0000
     6  C   -10.3986     3.6003     0.6145  C.2   1 RES1    0.0000
     7  C    -8.0261     0.6951     0.1841  C.2   1 RES1    0.0000
     8  C    -8.0262    -0.6950    -0.1838  C.2   1 RES1    0.0000
     9  N    -6.8903    -1.3707    -0.2669  N.2   1 RES1    0.0000
    10  C    -5.7172    -0.7191    -0.0907  C.2   1 RES1    0.0000
    11  C    -5.7172     0.7192     0.0902  C.2   1 RES1    0.0000
    12  N    -6.8902     1.3708     0.2668  N.2   1 RES1    0.0000
    13  N    -4.5891     1.4219     0.1256  N.2   1 RES1    0.0000
    14  C    -3.4350     0.7337     0.0413  C.2   1 RES1    0.0000
    15  C    -3.4350    -0.7337    -0.0429  C.2   1 RES1    0.0000
    16  N    -4.5892    -1.4218    -0.1266  N.2   1 RES1    0.0000
    17  N    -2.2939     1.4252     0.0498  N.2   1 RES1    0.0000
    18  C    -1.1448     0.7351     0.0114  C.2   1 RES1    0.0000
    19  C    -1.1449    -0.7351    -0.0135  C.2   1 RES1    0.0000
    20  N    -2.2939    -1.4252    -0.0517  N.2   1 RES1    0.0000
    21  N     0.0004     1.4268     0.0002  N.2   1 RES1    0.0000
    22  C     1.1455     0.7351    -0.0123  C.2   1 RES1    0.0000
    23  C     1.1455    -0.7352     0.0101  C.2   1 RES1    0.0000
    24  N     0.0003    -1.4268    -0.0023  N.2   1 RES1    0.0000
    25  N     2.2945    -1.4254     0.0474  N.2   1 RES1    0.0000
    26  C     3.4356    -0.7339     0.0398  C.2   1 RES1    0.0000
    27  C     3.4357     0.7337    -0.0419  C.2   1 RES1    0.0000
    28  N     2.2946     1.4253    -0.0493  N.2   1 RES1    0.0000
    29  N     4.5898    -1.4221     0.1232  N.2   1 RES1    0.0000
    30  C     5.7178    -0.7194     0.0889  C.2   1 RES1    0.0000
    31  C     5.7179     0.7192    -0.0899  C.2   1 RES1    0.0000
    32  N     4.5898     1.4219    -0.1247  N.2   1 RES1    0.0000
    33  N     6.8908    -1.3712     0.2649  N.2   1 RES1    0.0000
    34  C     8.0268    -0.6954     0.1832  C.2   1 RES1    0.0000
    35  C     8.0269     0.6951    -0.1835  C.2   1 RES1    0.0000
    36  N     6.8910     1.3709    -0.2655  N.2   1 RES1    0.0000
    37  C     9.2388     1.4682    -0.5543  C.2   1 RES1    0.0000
    38  C     9.3073     2.8321    -0.2346  C.2   1 RES1    0.0000
    39  C    10.3991     3.6008    -0.6105  C.2   1 RES1    0.0000
    40  C    11.4448     3.0339    -1.3352  C.2   1 RES1    0.0000
    41  C    11.3770     1.6884    -1.6841  C.2   1 RES1    0.0000
    42  C    10.2893     0.9157    -1.2989  C.2   1 RES1    0.0000
    43  C     9.2384    -1.4684     0.5550  C.2   1 RES1    0.0000
    44  C    10.2885    -0.9156     1.3000  C.2   1 RES1    0.0000
    45  C    11.3760    -1.6881     1.6861  C.2   1 RES1    0.0000
    46  C    11.4441    -3.0337     1.3376  C.2   1 RES1    0.0000
    47  C    10.3990    -3.6009     0.6125  C.2   1 RES1    0.0000
    48  C     9.3073    -2.8324     0.2356  C.2   1 RES1    0.0000
    49  C    -9.2386    -1.4676    -0.5541  C.2   1 RES1    0.0000
    50  C    -9.3063    -2.8323    -0.2374  C.2   1 RES1    0.0000
    51  C   -10.3989    -3.6001    -0.6128  C.2   1 RES1    0.0000
    52  C   -11.4463    -3.0314    -1.3336  C.2   1 RES1    0.0000
    53  C   -11.3795    -1.6850    -1.6791  C.2   1 RES1    0.0000
    54  C   -10.2910    -0.9132    -1.2945  C.2   1 RES1    0.0000
    55  H     8.4779     3.2738     0.3008  H     1 RES1    0.0000
    56  H    10.4315     4.6509    -0.3430  H     1 RES1    0.0000
    57  H    12.2942     3.6361    -1.6359  H     1 RES1    0.0000
    58  H    12.1716     1.2377    -2.2676  H     1 RES1    0.0000
    59  H    10.2463    -0.1244    -1.5915  H     1 RES1    0.0000
    60  H    10.2453     0.1246     1.5923  H     1 RES1    0.0000
    61  H    12.1702    -1.2372     2.2699  H     1 RES1    0.0000
    62  H    12.2934    -3.6357     1.6390  H     1 RES1    0.0000
    63  H    10.4316    -4.6510     0.3452  H     1 RES1    0.0000
    64  H     8.4783    -3.2743    -0.3002  H     1 RES1    0.0000
    65  H    -8.4756    -3.2752     0.2949  H     1 RES1    0.0000
    66  H   -10.4305    -4.6508    -0.3479  H     1 RES1    0.0000
    67  H   -12.2963    -3.6329    -1.6339  H     1 RES1    0.0000
    68  H   -12.1756    -1.2329    -2.2594  H     1 RES1    0.0000
    69  H   -10.2489     0.1278    -1.5842  H     1 RES1    0.0000
    70  H   -10.2484    -0.1279     1.5851  H     1 RES1    0.0000
    71  H   -12.1748     1.2328     2.2612  H     1 RES1    0.0000
    72  H   -12.2956     3.6329     1.6361  H     1 RES1    0.0000
    73  H   -10.4303     4.6510     0.3497  H     1 RES1    0.0000
    74  H    -8.4756     3.2755    -0.2940  H     1 RES1    0.0000
@<TRIPOS>BOND
     1      1      2      1
     2      1      6      1
     3      1     74      1
     4      2      3      1
     5      2      7      1
     6      3      4      1
     7      3     70      1
     8      4      5      1
     9      4     71      1
    10      5      6      1
    11      5     72      1
    12      6     73      1
    13      7      8      1
    14      7     12      1
    15      8      9      1
    16      8     49      1
    17      9     10      1
    18     10     11      1
    19     10     16      1
    20     11     12      1
    21     11     13      1
    22     13     14      1
    23     14     15      1
    24     14     17      1
    25     15     16      1
    26     15     20      1
    27     17     18      1
    28     18     19      1
    29     18     21      1
    30     19     20      1
    31     19     24      1
    32     21     22      1
    33     22     23      1
    34     22     28      1
    35     23     24      1
    36     23     25      1
    37     25     26      1
    38     26     27      1
    39     26     29      1
    40     27     28      1
    41     27     32      1
    42     29     30      1
    43     30     31      1
    44     30     33      1
    45     31     32      1
    46     31     36      1
    47     33     34      1
    48     34     35      1
    49     34     43      1
    50     35     36      1
    51     35     37      1
    52     37     38      1
    53     37     42      1
    54     38     39      1
    55     38     55      1
    56     39     40      1
    57     39     56      1
    58     40     41      1
    59     40     57      1
    60     41     42      1
    61     41     58      1
    62     42     59      1
    63     43     44      1
    64     43     48      1
    65     44     45      1
    66     44     60      1
    67     45     46      1
    68     45     61      1
    69     46     47      1
    70     46     62      1
    71     47     48      1
    72     47     63      1
    73     48     64      1
    74     49     50      1
    75     49     54      1
    76     50     51      1
    77     50     65      1
    78     51     52      1
    79     51     66      1
    80     52     53      1
    81     52     67      1
    82     53     54      1
    83     53     68      1
    84     54     69      1
@<TRIPOS>SUBSTRUCTURE
      1 RES1       1

N14Ph4_B3LYP_Def2_TZVP_-2.mol
@<TRIPOS>MOLECULE
 DA ground state (Ph4N14HEPT,-2)
    74     84      1
 SMALL
 NO_CHARGES
 ****
 ****
@<TRIPOS>ATOM
     1  N     0.0008     1.4277    -0.0131  N.2   1 RES1    0.0000
     2  C     1.1460     0.7405    -0.0351  C.2   1 RES1    0.0000
     3  C     1.1457    -0.7455     0.0036  C.2   1 RES1    0.0000
     4  N    -0.0002    -1.4318    -0.0185  N.2   1 RES1    0.0000
     5  N     2.2871     1.4237    -0.0936  N.2   1 RES1    0.0000
     6  C     3.4362     0.7336    -0.0757  C.2   1 RES1    0.0000
     7  C     3.4360    -0.7392     0.0478  C.2   1 RES1    0.0000
     8  N     2.2866    -1.4290     0.0626  N.2   1 RES1    0.0000
     9  N     4.5779     1.4140    -0.1766  N.2   1 RES1    0.0000
    10  C     5.7158     0.7105    -0.1159  C.2   1 RES1    0.0000
    11  C     5.7157    -0.7150     0.0999  C.2   1 RES1    0.0000
    12  N     4.5777    -1.4192     0.1534  N.2   1 RES1    0.0000
    13  N     6.8821     1.3593    -0.2884  N.2   1 RES1    0.0000
    14  C     8.0213     0.6886    -0.1860  C.2   1 RES1    0.0000
    15  C     8.0208    -0.6904     0.1865  C.2   1 RES1    0.0000
    16  N     6.8817    -1.3627     0.2802  N.2   1 RES1    0.0000
    17  C    -1.1456    -0.7446    -0.0366  C.2   1 RES1    0.0000
    18  C    -1.1450     0.7413     0.0077  C.2   1 RES1    0.0000
    19  N    -2.2871    -1.4271    -0.0969  N.2   1 RES1    0.0000
    20  C    -3.4359    -0.7367    -0.0759  C.2   1 RES1    0.0000
    21  C    -3.4351     0.7357     0.0529  C.2   1 RES1    0.0000
    22  N    -2.2855     1.4251     0.0697  N.2   1 RES1    0.0000
    23  N    -4.5783    -1.4160    -0.1787  N.2   1 RES1    0.0000
    24  C    -5.7156    -0.7119    -0.1160  C.2   1 RES1    0.0000
    25  C    -5.7146     0.7131     0.1035  C.2   1 RES1    0.0000
    26  N    -4.5762     1.4162     0.1599  N.2   1 RES1    0.0000
    27  N    -6.8826    -1.3594    -0.2897  N.2   1 RES1    0.0000
    28  C    -8.0212    -0.6880    -0.1857  C.2   1 RES1    0.0000
    29  C    -8.0197     0.6904     0.1890  C.2   1 RES1    0.0000
    30  N    -6.8800     1.3614     0.2846  N.2   1 RES1    0.0000
    31  C     9.2372     1.4707    -0.5396  C.2   1 RES1    0.0000
    32  C     9.3155     2.8211    -0.1771  C.2   1 RES1    0.0000
    33  C    10.4127     3.5940    -0.5316  C.2   1 RES1    0.0000
    34  C    11.4530     3.0408    -1.2730  C.2   1 RES1    0.0000
    35  C    11.3768     1.7072    -1.6605  C.2   1 RES1    0.0000
    36  C    10.2826     0.9316    -1.2975  C.2   1 RES1    0.0000
    37  H     8.4897     3.2531     0.3718  H     1 RES1    0.0000
    38  H    10.4527     4.6354    -0.2336  H     1 RES1    0.0000
    39  H    12.3071     3.6452    -1.5552  H     1 RES1    0.0000
    40  H    12.1693     1.2680    -2.2554  H     1 RES1    0.0000
    41  H    10.2328    -0.1007    -1.6164  H     1 RES1    0.0000
    42  C     9.2351    -1.4703     0.5513  C.2   1 RES1    0.0000
    43  C    10.2724    -0.9288     1.3185  C.2   1 RES1    0.0000
    44  C    11.3645    -1.7022     1.6923  C.2   1 RES1    0.0000
    45  C    11.4465    -3.0361     1.3068  C.2   1 RES1    0.0000
    46  C    10.4144    -3.5914     0.5556  C.2   1 RES1    0.0000
    47  C     9.3193    -2.8206     0.1901  C.2   1 RES1    0.0000
    48  H    10.2178     0.1038     1.6360  H     1 RES1    0.0000
    49  H    12.1504    -1.2613     2.2946  H     1 RES1    0.0000
    50  H    12.2988    -3.6389     1.5979  H     1 RES1    0.0000
    51  H    10.4590    -4.6330     0.2587  H     1 RES1    0.0000
    52  H     8.4996    -3.2545    -0.3664  H     1 RES1    0.0000
    53  C    -9.2380    -1.4688    -0.5400  C.2   1 RES1    0.0000
    54  C    -9.3184    -2.8188    -0.1768  C.2   1 RES1    0.0000
    55  C   -10.4170    -3.5900    -0.5306  C.2   1 RES1    0.0000
    56  C   -11.4566    -3.0353    -1.2718  C.2   1 RES1    0.0000
    57  C   -11.3784    -1.7020    -1.6598  C.2   1 RES1    0.0000
    58  C   -10.2828    -0.9281    -1.2975  C.2   1 RES1    0.0000
    59  H    -8.4934    -3.2520     0.3724  H     1 RES1    0.0000
    60  H   -10.4588    -4.6311    -0.2319  H     1 RES1    0.0000
    61  H   -12.3119    -3.6384    -1.5534  H     1 RES1    0.0000
    62  H   -12.1704    -1.2616    -2.2545  H     1 RES1    0.0000
    63  H   -10.2316     0.1042    -1.6163  H     1 RES1    0.0000
    64  C    -9.2336     1.4714     0.5525  C.2   1 RES1    0.0000
    65  C   -10.2729     0.9306     1.3175  C.2   1 RES1    0.0000
    66  C   -11.3656     1.7047     1.6885  C.2   1 RES1    0.0000
    67  C   -11.4463     3.0383     1.3018  C.2   1 RES1    0.0000
    68  C   -10.4120     3.5930     0.5532  C.2   1 RES1    0.0000
    69  C    -9.3163     2.8218     0.1908  C.2   1 RES1    0.0000
    70  H   -10.2196    -0.1018     1.6355  H     1 RES1    0.0000
    71  H   -12.1532     1.2643     2.2889  H     1 RES1    0.0000
    72  H   -12.2992     3.6415     1.5903  H     1 RES1    0.0000
    73  H   -10.4557     4.6344     0.2555  H     1 RES1    0.0000
    74  H    -8.4952     3.2550    -0.3642  H     1 RES1    0.0000
@<TRIPOS>BOND
     1      1      2      1
     2      1     18      1
     3      2      3      1
     4      2      5      1
     5      3      4      1
     6      3      8      1
     7      4     17      1
     8      5      6      1
     9      6      7      1
    10      6      9      1
    11      7      8      1
    12      7     12      1
    13      9     10      1
    14     10     11      1
    15     10     13      1
    16     11     12      1
    17     11     16      1
    18     13     14      1
    19     14     15      1
    20     14     31      1
    21     15     16      1
    22     15     42      1
    23     17     18      1
    24     17     19      1
    25     18     22      1
    26     19     20      1
    27     20     21      1
    28     20     23      1
    29     21     22      1
    30     21     26      1
    31     23     24      1
    32     24     25      1
    33     24     27      1
    34     25     26      1
    35     25     30      1
    36     27     28      1
    37     28     29      1
    38     28     53      1
    39     29     30      1
    40     29     64      1
    41     31     32      1
    42     31     36      1
    43     32     33      1
    44     32     37      1
    45     33     34      1
    46     33     38      1
    47     34     35      1
    48     34     39      1
    49     35     36      1
    50     35     40      1
    51     36     41      1
    52     42     43      1
    53     42     47      1
    54     43     44      1
    55     43     48      1
    56     44     45      1
    57     44     49      1
    58     45     46      1
    59     45     50      1
    60     46     47      1
    61     46     51      1
    62     47     52      1
    63     53     54      1
    64     53     58      1
    65     54     55      1
    66     54     59      1
    67     55     56      1
    68     55     60      1
    69     56     57      1
    70     56     61      1
    71     57     58      1
    72     57     62      1
    73     58     63      1
    74     64     65      1
    75     64     69      1
    76     65     66      1
    77     65     70      1
    78     66     67      1
    79     66     71      1
    80     67     68      1
    81     67     72      1
    82     68     69      1
    83     68     73      1
    84     69     74      1
@<TRIPOS>SUBSTRUCTURE
      1 RES1       1

N14Ph4_B3LYP_Def2_TZVP.mol
@<TRIPOS>MOLECULE
 Ox ground state (Ph4N14HEPT,0)
    74     84      1
 SMALL
 NO_CHARGES
 ****
 ****
@<TRIPOS>ATOM
     1  N     0.0013     1.4271    -0.1137  N.2   1 RES1    0.0000
     2  C    -1.1358     0.7340    -0.0953  C.2   1 RES1    0.0000
     3  C    -1.1378    -0.7322    -0.1076  C.2   1 RES1    0.0000
     4  N    -0.0027    -1.4285    -0.0954  N.2   1 RES1    0.0000
     5  N    -2.2846     1.4301    -0.0539  N.2   1 RES1    0.0000
     6  C    -3.4082     0.7379    -0.0443  C.2   1 RES1    0.0000
     7  C    -3.4108    -0.7300    -0.1181  C.2   1 RES1    0.0000
     8  N    -2.2891    -1.4250    -0.1336  N.2   1 RES1    0.0000
     9  N    -4.5700     1.4307     0.0662  N.2   1 RES1    0.0000
    10  C    -5.6742     0.7298     0.0564  C.2   1 RES1    0.0000
    11  C    -5.6789    -0.7179    -0.1435  C.2   1 RES1    0.0000
    12  N    -4.5769    -1.4202    -0.1949  N.2   1 RES1    0.0000
    13  N    -6.8520     1.3730     0.3157  N.2   1 RES1    0.0000
    14  C    -7.9652     0.7061     0.2620  C.2   1 RES1    0.0000
    15  C    -7.9770    -0.6944    -0.2449  C.2   1 RES1    0.0000
    16  N    -6.8671    -1.3602    -0.3529  N.2   1 RES1    0.0000
    17  C     1.1345    -0.7352    -0.0866  C.2   1 RES1    0.0000
    18  C     1.1365     0.7307    -0.1175  C.2   1 RES1    0.0000
    19  N     2.2833    -1.4306    -0.0378  N.2   1 RES1    0.0000
    20  C     3.4069    -0.7383    -0.0367  C.2   1 RES1    0.0000
    21  C     3.4095     0.7287    -0.1258  C.2   1 RES1    0.0000
    22  N     2.2876     1.4233    -0.1508  N.2   1 RES1    0.0000
    23  N     4.5688    -1.4300     0.0790  N.2   1 RES1    0.0000
    24  C     5.6732    -0.7293     0.0625  C.2   1 RES1    0.0000
    25  C     5.6778     0.7169    -0.1468  C.2   1 RES1    0.0000
    26  N     4.5755     1.4185    -0.2059  N.2   1 RES1    0.0000
    27  N     6.8513    -1.3717     0.3226  N.2   1 RES1    0.0000
    28  C     7.9647    -0.7054     0.2643  C.2   1 RES1    0.0000
    29  C     7.9760     0.6942    -0.2448  C.2   1 RES1    0.0000
    30  N     6.8660     1.3592    -0.3564  N.2   1 RES1    0.0000
    31  C    -9.1680     1.3907     0.7803  C.2   1 RES1    0.0000
    32  C    -9.2796     2.7794     0.6321  C.2   1 RES1    0.0000
    33  C   -10.3641     3.4569     1.1656  C.2   1 RES1    0.0000
    34  C   -11.3375     2.7653     1.8816  C.2   1 RES1    0.0000
    35  C   -11.2223     1.3907     2.0569  C.2   1 RES1    0.0000
    36  C   -10.1524     0.7039     1.5013  C.2   1 RES1    0.0000
    37  H    -8.5046     3.3119     0.0986  H     1 RES1    0.0000
    38  H   -10.4472     4.5277     1.0314  H     1 RES1    0.0000
    39  H   -12.1794     3.2972     2.3062  H     1 RES1    0.0000
    40  H   -11.9667     0.8510     2.6279  H     1 RES1    0.0000
    41  H   -10.0728    -0.3639     1.6495  H     1 RES1    0.0000
    42  C    -9.2038    -1.3806    -0.7009  C.2   1 RES1    0.0000
    43  C   -10.2262    -0.6957    -1.3687  C.2   1 RES1    0.0000
    44  C   -11.3238    -1.3842    -1.8652  C.2   1 RES1    0.0000
    45  C   -11.4279    -2.7587    -1.6825  C.2   1 RES1    0.0000
    46  C   -10.4166    -3.4485    -1.0193  C.2   1 RES1    0.0000
    47  C    -9.3057    -2.7693    -0.5456  C.2   1 RES1    0.0000
    48  H   -10.1563     0.3722    -1.5217  H     1 RES1    0.0000
    49  H   -12.0986    -0.8458    -2.3954  H     1 RES1    0.0000
    50  H   -12.2910    -3.2919    -2.0603  H     1 RES1    0.0000
    51  H   -10.4912    -4.5193    -0.8795  H     1 RES1    0.0000
    52  H    -8.5029    -3.3002    -0.0533  H     1 RES1    0.0000
    53  C     9.1690    -1.3903     0.7791  C.2   1 RES1    0.0000
    54  C     9.2811    -2.7786     0.6275  C.2   1 RES1    0.0000
    55  C    10.3675    -3.4566     1.1566  C.2   1 RES1    0.0000
    56  C    11.3422    -2.7660     1.8717  C.2   1 RES1    0.0000
    57  C    11.2265    -1.3920     2.0506  C.2   1 RES1    0.0000
    58  C    10.1547    -0.7046     1.4992  C.2   1 RES1    0.0000
    59  H     8.5052    -3.3104     0.0947  H     1 RES1    0.0000
    60  H    10.4510    -4.5271     1.0196  H     1 RES1    0.0000
    61  H    12.1856    -3.2984     2.2928  H     1 RES1    0.0000
    62  H    11.9720    -0.8531     2.6208  H     1 RES1    0.0000
    63  H    10.0750     0.3629     1.6500  H     1 RES1    0.0000
    64  C     9.2032     1.3813    -0.6988  C.2   1 RES1    0.0000
    65  C    10.2249     0.6980    -1.3693  C.2   1 RES1    0.0000
    66  C    11.3228     1.3874    -1.8637  C.2   1 RES1    0.0000
    67  C    11.4281     2.7611    -1.6759  C.2   1 RES1    0.0000
    68  C    10.4175     3.4493    -1.0100  C.2   1 RES1    0.0000
    69  C     9.3061     2.7693    -0.5386  C.2   1 RES1    0.0000
    70  H    10.1541    -0.3693    -1.5259  H     1 RES1    0.0000
    71  H    12.0970     0.8504    -2.3962  H     1 RES1    0.0000
    72  H    12.2916     3.2951    -2.0519  H     1 RES1    0.0000
    73  H    10.4931     4.5195    -0.8661  H     1 RES1    0.0000
    74  H     8.5037     3.2991    -0.0444  H     1 RES1    0.0000
@<TRIPOS>BOND
     1      1      2      1
     2      1     18      1
     3      2      3      1
     4      2      5      1
     5      3      4      1
     6      3      8      1
     7      4     17      1
     8      5      6      1
     9      6      7      1
    10      6      9      1
    11      7      8      1
    12      7     12      1
    13      9     10      1
    14     10     11      1
    15     10     13      1
    16     11     12      1
    17     11     16      1
    18     13     14      1
    19     14     15      1
    20     14     31      1
    21     15     16      1
    22     15     42      1
    23     17     18      1
    24     17     19      1
    25     18     22      1
    26     19     20      1
    27     20     21      1
    28     20     23      1
    29     21     22      1
    30     21     26      1
    31     23     24      1
    32     24     25      1
    33     24     27      1
    34     25     26      1
    35     25     30      1
    36     27     28      1
    37     28     29      1
    38     28     53      1
    39     29     30      1
    40     29     64      1
    41     31     32      1
    42     31     36      1
    43     32     33      1
    44     32     37      1
    45     33     34      1
    46     33     38      1
    47     34     35      1
    48     34     39      1
    49     35     36      1
    50     35     40      1
    51     36     41      1
    52     42     43      1
    53     42     47      1
    54     43     44      1
    55     43     48      1
    56     44     45      1
    57     44     49      1
    58     45     46      1
    59     45     50      1
    60     46     47      1
    61     46     51      1
    62     47     52      1
    63     53     54      1
    64     53     58      1
    65     54     55      1
    66     54     59      1
    67     55     56      1
    68     55     60      1
    69     56     57      1
    70     56     61      1
    71     57     58      1
    72     57     62      1
    73     58     63      1
    74     64     65      1
    75     64     69      1
    76     65     66      1
    77     65     70      1
    78     66     67      1
    79     66     71      1
    80     67     68      1
    81     67     72      1
    82     68     69      1
    83     68     73      1
    84     69     74      1
@<TRIPOS>SUBSTRUCTURE
      1 RES1       1

N14Ph4H2_B3LYP_Def2_TZVP_H_+1_Is10.mol
@<TRIPOS>MOLECULE
 T2-H1 ground state (Ph4H3N14HEPT,+1)
    77     87      1
 SMALL
 NO_CHARGES
 ****
 ****
@<TRIPOS>ATOM
     1  N     0.0444     1.4296     0.1413  N.2   1 RES1    0.0000
     2  C     1.2129     0.7349     0.0660  C.2   1 RES1    0.0000
     3  C     1.2132    -0.7208    -0.0652  C.2   1 RES1    0.0000
     4  N     0.0452    -1.4161    -0.1405  N.2   1 RES1    0.0000
     5  N     2.3409     1.4306     0.1123  N.2   1 RES1    0.0000
     6  C     3.4873     0.7357     0.0462  C.2   1 RES1    0.0000
     7  C     3.4877    -0.7204    -0.0451  C.2   1 RES1    0.0000
     8  N     2.3416    -1.4159    -0.1113  N.pl3 1 RES1    0.0000
     9  N     4.6379     1.4366     0.0485  N.2   1 RES1    0.0000
    10  C     5.7561     0.7332    -0.0002  C.2   1 RES1    0.0000
    11  C     5.7565    -0.7168     0.0015  C.2   1 RES1    0.0000
    12  N     4.6387    -1.4207    -0.0473  N.2   1 RES1    0.0000
    13  N     6.9363     1.4121    -0.1179  N.2   1 RES1    0.0000
    14  C     8.0546     0.7373    -0.1256  C.2   1 RES1    0.0000
    15  C     8.0550    -0.7197     0.1271  C.2   1 RES1    0.0000
    16  N     6.9370    -1.3951     0.1194  N.2   1 RES1    0.0000
    17  C    -1.0640    -0.7260    -0.0764  C.2   1 RES1    0.0000
    18  C    -1.0643     0.7390     0.0770  C.2   1 RES1    0.0000
    19  N    -2.2526    -1.4153    -0.1555  N.2   1 RES1    0.0000
    20  C    -3.3444    -0.7255    -0.0816  C.2   1 RES1    0.0000
    21  C    -3.3448     0.7373     0.0819  C.2   1 RES1    0.0000
    22  N    -2.2534     1.4276     0.1560  N.2   1 RES1    0.0000
    23  N    -4.5591    -1.3573    -0.1564  N.pl3 1 RES1    0.0000
    24  C    -5.7733    -0.6933    -0.0912  C.2   1 RES1    0.0000
    25  C    -5.7737     0.7038     0.0915  C.2   1 RES1    0.0000
    26  N    -4.5598     1.3685     0.1565  N.pl3 1 RES1    0.0000
    27  N    -6.8971    -1.3622    -0.2205  N.2   1 RES1    0.0000
    28  C    -8.0636    -0.6894    -0.1444  C.2   1 RES1    0.0000
    29  C    -8.0640     0.6987     0.1450  C.2   1 RES1    0.0000
    30  N    -6.8978     1.3722     0.2210  N.2   1 RES1    0.0000
    31  C     9.2806     1.5104    -0.4470  C.2   1 RES1    0.0000
    32  C     9.3928     2.8334     0.0069  C.2   1 RES1    0.0000
    33  C    10.5028     3.6012    -0.3266  C.2   1 RES1    0.0000
    34  C    11.5032     3.0704    -1.1418  C.2   1 RES1    0.0000
    35  C    11.3876     1.7657    -1.6193  C.2   1 RES1    0.0000
    36  C    10.2901     0.9859    -1.2672  C.2   1 RES1    0.0000
    37  H     8.5985     3.2482     0.6160  H     1 RES1    0.0000
    38  H    10.5836     4.6184     0.0423  H     1 RES1    0.0000
    39  H    12.3653     3.6731    -1.4089  H     1 RES1    0.0000
    40  H    12.1532     1.3528    -2.2679  H     1 RES1    0.0000
    41  H    10.2127    -0.0258    -1.6477  H     1 RES1    0.0000
    42  C     9.2814    -1.4922     0.4487  C.2   1 RES1    0.0000
    43  C    10.2904    -0.9671     1.2691  C.2   1 RES1    0.0000
    44  C    11.3883    -1.7464     1.6213  C.2   1 RES1    0.0000
    45  C    11.5046    -3.0510     1.1438  C.2   1 RES1    0.0000
    46  C    10.5046    -3.5824     0.3285  C.2   1 RES1    0.0000
    47  C     9.3942    -2.8151    -0.0052  C.2   1 RES1    0.0000
    48  H    10.2125     0.0446     1.6495  H     1 RES1    0.0000
    49  H    12.1536    -1.3331     2.2699  H     1 RES1    0.0000
    50  H    12.3670    -3.6533     1.4109  H     1 RES1    0.0000
    51  H    10.5860    -4.5996    -0.0405  H     1 RES1    0.0000
    52  H     8.6002    -3.2304    -0.6144  H     1 RES1    0.0000
    53  C    -9.2777    -1.5014    -0.4171  C.2   1 RES1    0.0000
    54  C    -9.3789    -2.7944     0.1146  C.2   1 RES1    0.0000
    55  C   -10.4877    -3.5889    -0.1612  C.2   1 RES1    0.0000
    56  C   -11.5025    -3.1118    -0.9899  C.2   1 RES1    0.0000
    57  C   -11.4005    -1.8350    -1.5409  C.2   1 RES1    0.0000
    58  C   -10.2999    -1.0331    -1.2537  C.2   1 RES1    0.0000
    59  H    -8.5820    -3.1721     0.7452  H     1 RES1    0.0000
    60  H   -10.5568    -4.5836     0.2672  H     1 RES1    0.0000
    61  H   -12.3642    -3.7333    -1.2105  H     1 RES1    0.0000
    62  H   -12.1780    -1.4624    -2.1998  H     1 RES1    0.0000
    63  H   -10.2306    -0.0441    -1.6919  H     1 RES1    0.0000
    64  C    -9.2785     1.5100     0.4180  C.2   1 RES1    0.0000
    65  C   -10.3002     1.0410     1.2548  C.2   1 RES1    0.0000
    66  C   -11.4012     1.8423     1.5423  C.2   1 RES1    0.0000
    67  C   -11.5041     3.1191     0.9914  C.2   1 RES1    0.0000
    68  C   -10.4897     3.5969     0.1625  C.2   1 RES1    0.0000
    69  C    -9.3805     2.8030    -0.1136  C.2   1 RES1    0.0000
    70  H   -10.2302     0.0520     1.6928  H     1 RES1    0.0000
    71  H   -12.1784     1.4692     2.2013  H     1 RES1    0.0000
    72  H   -12.3661     3.7401     1.2122  H     1 RES1    0.0000
    73  H   -10.5594     4.5915    -0.2658  H     1 RES1    0.0000
    74  H    -8.5839     3.1812    -0.7442  H     1 RES1    0.0000
    75  H    -4.5626     2.3737     0.2906  H     1 RES1    0.0000
    76  H    -4.5614    -2.3625    -0.2905  H     1 RES1    0.0000
    77  H     2.3028    -2.4190    -0.2023  H     1 RES1    0.0000
@<TRIPOS>BOND
     1      1      2      1
     2      1     18      1
     3      2      3      1
     4      2      5      1
     5      3      4      1
     6      3      8      1
     7      4     17      1
     8      5      6      1
     9      6      7      1
    10      6      9      1
    11      7      8      1
    12      7     12      1
    13      8     77      1
    14      9     10      1
    15     10     11      1
    16     10     13      1
    17     11     12      1
    18     11     16      1
    19     13     14      1
    20     14     15      1
    21     14     31      1
    22     15     16      1
    23     15     42      1
    24     17     18      1
    25     17     19      1
    26     18     22      1
    27     19     20      1
    28     20     21      1
    29     20     23      1
    30     21     22      1
    31     21     26      1
    32     23     24      1
    33     23     76      1
    34     24     25      1
    35     24     27      1
    36     25     26      1
    37     25     30      1
    38     26     75      1
    39     27     28      1
    40     28     29      1
    41     28     53      1
    42     29     30      1
    43     29     64      1
    44     31     32      1
    45     31     36      1
    46     32     33      1
    47     32     37      1
    48     33     34      1
    49     33     38      1
    50     34     35      1
    51     34     39      1
    52     35     36      1
    53     35     40      1
    54     36     41      1
    55     42     43      1
    56     42     47      1
    57     43     44      1
    58     43     48      1
    59     44     45      1
    60     44     49      1
    61     45     46      1
    62     45     50      1
    63     46     47      1
    64     46     51      1
    65     47     52      1
    66     53     54      1
    67     53     58      1
    68     54     55      1
    69     54     59      1
    70     55     56      1
    71     55     60      1
    72     56     57      1
    73     56     61      1
    74     57     58      1
    75     57     62      1
    76     58     63      1
    77     64     65      1
    78     64     69      1
    79     65     66      1
    80     65     70      1
    81     66     67      1
    82     66     71      1
    83     67     68      1
    84     67     72      1
    85     68     69      1
    86     68     73      1
    87     69     74      1
@<TRIPOS>SUBSTRUCTURE
      1 RES1       1

N14Ph4H2_B3LYP_Def2_TZVP_H_+1_Is11.mol
@<TRIPOS>MOLECULE
 T2-H2 ground state (Ph4H3N14HEPT,+1)
    77     87      1
 SMALL
 NO_CHARGES
 ****
 ****
@<TRIPOS>ATOM
     1  N     0.0377     1.4296     0.1416  N.2   1 RES1    0.0000
     2  C     1.2063     0.7352     0.0660  C.2   1 RES1    0.0000
     3  C     1.2070    -0.7204    -0.0658  C.2   1 RES1    0.0000
     4  N     0.0392    -1.4160    -0.1415  N.2   1 RES1    0.0000
     5  N     2.3342     1.4312     0.1126  N.2   1 RES1    0.0000
     6  C     3.4807     0.7366     0.0461  C.2   1 RES1    0.0000
     7  C     3.4815    -0.7195    -0.0458  C.2   1 RES1    0.0000
     8  N     2.3356    -1.4152    -0.1123  N.2   1 RES1    0.0000
     9  N     4.6312     1.4378     0.0487  N.2   1 RES1    0.0000
    10  C     5.7495     0.7348    -0.0003  C.2   1 RES1    0.0000
    11  C     5.7503    -0.7153     0.0008  C.2   1 RES1    0.0000
    12  N     4.6327    -1.4195    -0.0483  N.pl3 1 RES1    0.0000
    13  N     6.9296     1.4140    -0.1178  N.2   1 RES1    0.0000
    14  C     8.0480     0.7395    -0.1257  C.2   1 RES1    0.0000
    15  C     8.0488    -0.7177     0.1263  C.2   1 RES1    0.0000
    16  N     6.9310    -1.3933     0.1183  N.2   1 RES1    0.0000
    17  C    -1.0702    -0.7262    -0.0770  C.2   1 RES1    0.0000
    18  C    -1.0709     0.7387     0.0770  C.2   1 RES1    0.0000
    19  N    -2.2586    -1.4158    -0.1564  N.2   1 RES1    0.0000
    20  C    -3.3506    -0.7263    -0.0822  C.2   1 RES1    0.0000
    21  C    -3.3514     0.7364     0.0820  C.2   1 RES1    0.0000
    22  N    -2.2601     1.4270     0.1563  N.2   1 RES1    0.0000
    23  N    -4.5651    -1.3584    -0.1572  N.pl3 1 RES1    0.0000
    24  C    -5.7795    -0.6947    -0.0917  C.2   1 RES1    0.0000
    25  C    -5.7802     0.7023     0.0916  C.2   1 RES1    0.0000
    26  N    -4.5665     1.3673     0.1569  N.pl3 1 RES1    0.0000
    27  N    -6.9031    -1.3639    -0.2213  N.2   1 RES1    0.0000
    28  C    -8.0698    -0.6914    -0.1449  C.2   1 RES1    0.0000
    29  C    -8.0705     0.6966     0.1451  C.2   1 RES1    0.0000
    30  N    -6.9045     1.3703     0.2214  N.2   1 RES1    0.0000
    31  C     9.2739     1.5131    -0.4469  C.2   1 RES1    0.0000
    32  C     9.3857     2.8358     0.0076  C.2   1 RES1    0.0000
    33  C    10.4954     3.6041    -0.3256  C.2   1 RES1    0.0000
    34  C    11.4960     3.0739    -1.1411  C.2   1 RES1    0.0000
    35  C    11.3807     1.7694    -1.6192  C.2   1 RES1    0.0000
    36  C    10.2834     0.9891    -1.2674  C.2   1 RES1    0.0000
    37  H     8.5913     3.2502     0.6169  H     1 RES1    0.0000
    38  H    10.5760     4.6212     0.0438  H     1 RES1    0.0000
    39  H    12.3579     3.6769    -1.4079  H     1 RES1    0.0000
    40  H    12.1464     1.3569    -2.2679  H     1 RES1    0.0000
    41  H    10.2063    -0.0225    -1.6482  H     1 RES1    0.0000
    42  C     9.2754    -1.4899     0.4475  C.2   1 RES1    0.0000
    43  C    10.2843    -0.9650     1.2681  C.2   1 RES1    0.0000
    44  C    11.3824    -1.7441     1.6200  C.2   1 RES1    0.0000
    45  C    11.4990    -3.0485     1.1419  C.2   1 RES1    0.0000
    46  C    10.4991    -3.5797     0.3264  C.2   1 RES1    0.0000
    47  C     9.3886    -2.8126    -0.0069  C.2   1 RES1    0.0000
    48  H    10.2062     0.0465     1.6490  H     1 RES1    0.0000
    49  H    12.1477    -1.3308     2.2687  H     1 RES1    0.0000
    50  H    12.3616    -3.6506     1.4088  H     1 RES1    0.0000
    51  H    10.5808    -4.5968    -0.0430  H     1 RES1    0.0000
    52  H     8.5947    -3.2278    -0.6163  H     1 RES1    0.0000
    53  C    -9.2837    -1.5036    -0.4179  C.2   1 RES1    0.0000
    54  C    -9.3846    -2.7969     0.1133  C.2   1 RES1    0.0000
    55  C   -10.4931    -3.5916    -0.1628  C.2   1 RES1    0.0000
    56  C   -11.5081    -3.1143    -0.9913  C.2   1 RES1    0.0000
    57  C   -11.4065    -1.8373    -1.5418  C.2   1 RES1    0.0000
    58  C   -10.3060    -1.0352    -1.2543  C.2   1 RES1    0.0000
    59  H    -8.5875    -3.1747     0.7436  H     1 RES1    0.0000
    60  H   -10.5619    -4.5864     0.2652  H     1 RES1    0.0000
    61  H   -12.3697    -3.7360    -1.2121  H     1 RES1    0.0000
    62  H   -12.1840    -1.4646    -2.2005  H     1 RES1    0.0000
    63  H   -10.2370    -0.0460    -1.6920  H     1 RES1    0.0000
    64  C    -9.2852     1.5075     0.4185  C.2   1 RES1    0.0000
    65  C   -10.3068     1.0378     1.2551  C.2   1 RES1    0.0000
    66  C   -11.4081     1.8387     1.5429  C.2   1 RES1    0.0000
    67  C   -11.5112     3.1157     0.9926  C.2   1 RES1    0.0000
    68  C   -10.4970     3.5941     0.1639  C.2   1 RES1    0.0000
    69  C    -9.3876     2.8006    -0.1126  C.2   1 RES1    0.0000
    70  H   -10.2366     0.0487     1.6927  H     1 RES1    0.0000
    71  H   -12.1851     1.4652     2.2018  H     1 RES1    0.0000
    72  H   -12.3734     3.7364     1.2137  H     1 RES1    0.0000
    73  H   -10.5670     4.5889    -0.2640  H     1 RES1    0.0000
    74  H    -8.5912     3.1793    -0.7431  H     1 RES1    0.0000
    75  H    -4.5696     2.3724     0.2914  H     1 RES1    0.0000
    76  H    -4.5672    -2.3635    -0.2917  H     1 RES1    0.0000
    77  H     4.6012    -2.4263    -0.0838  H     1 RES1    0.0000
@<TRIPOS>BOND
     1      1      2      1
     2      1     18      1
     3      2      3      1
     4      2      5      1
     5      3      4      1
     6      3      8      1
     7      4     17      1
     8      5      6      1
     9      6      7      1
    10      6      9      1
    11      7      8      1
    12      7     12      1
    13      9     10      1
    14     10     11      1
    15     10     13      1
    16     11     12      1
    17     11     16      1
    18     12     77      1
    19     13     14      1
    20     14     15      1
    21     14     31      1
    22     15     16      1
    23     15     42      1
    24     17     18      1
    25     17     19      1
    26     18     22      1
    27     19     20      1
    28     20     21      1
    29     20     23      1
    30     21     22      1
    31     21     26      1
    32     23     24      1
    33     23     76      1
    34     24     25      1
    35     24     27      1
    36     25     26      1
    37     25     30      1
    38     26     75      1
    39     27     28      1
    40     28     29      1
    41     28     53      1
    42     29     30      1
    43     29     64      1
    44     31     32      1
    45     31     36      1
    46     32     33      1
    47     32     37      1
    48     33     34      1
    49     33     38      1
    50     34     35      1
    51     34     39      1
    52     35     36      1
    53     35     40      1
    54     36     41      1
    55     42     43      1
    56     42     47      1
    57     43     44      1
    58     43     48      1
    59     44     45      1
    60     44     49      1
    61     45     46      1
    62     45     50      1
    63     46     47      1
    64     46     51      1
    65     47     52      1
    66     53     54      1
    67     53     58      1
    68     54     55      1
    69     54     59      1
    70     55     56      1
    71     55     60      1
    72     56     57      1
    73     56     61      1
    74     57     58      1
    75     57     62      1
    76     58     63      1
    77     64     65      1
    78     64     69      1
    79     65     66      1
    80     65     70      1
    81     66     67      1
    82     66     71      1
    83     67     68      1
    84     67     72      1
    85     68     69      1
    86     68     73      1
    87     69     74      1
@<TRIPOS>SUBSTRUCTURE
      1 RES1       1

N14Ph4H2_B3LYP_Def2_TZVP_H_+1_Is12.mol
@<TRIPOS>MOLECULE
 T2-H3 ground state (Ph4H3N14HEPT,+1)
    77     87      1
 SMALL
 NO_CHARGES
 ****
 ****
@<TRIPOS>ATOM
     1  N    -0.0173    -1.4410    -0.0242  N.2   1 RES1    0.0000
     2  C    -1.1796    -0.7487    -0.0209  C.2   1 RES1    0.0000
     3  C    -1.1782     0.7249    -0.0006  C.2   1 RES1    0.0000
     4  N    -0.0220     1.4181     0.0077  N.2   1 RES1    0.0000
     5  N    -2.3032    -1.4393    -0.0375  N.2   1 RES1    0.0000
     6  C    -3.4530    -0.7482    -0.0325  C.2   1 RES1    0.0000
     7  C    -3.4446     0.7199    -0.0007  C.2   1 RES1    0.0000
     8  N    -2.3083     1.4157     0.0117  N.2   1 RES1    0.0000
     9  N    -4.5926    -1.4442    -0.0591  N.2   1 RES1    0.0000
    10  C    -5.7252    -0.7514    -0.0521  C.2   1 RES1    0.0000
    11  C    -5.6871     0.6774    -0.0015  C.2   1 RES1    0.0000
    12  N    -4.6004     1.4069     0.0224  N.2   1 RES1    0.0000
    13  N    -6.9068    -1.3988    -0.1132  N.2   1 RES1    0.0000
    14  C    -8.0515    -0.7462    -0.0992  C.2   1 RES1    0.0000
    15  C    -8.0843     0.6901     0.0643  C.2   1 RES1    0.0000
    16  N    -6.9000     1.3106     0.0771  N.pl3 1 RES1    0.0000
    17  C     1.0929     0.7293     0.0007  C.2   1 RES1    0.0000
    18  C     1.0936    -0.7523    -0.0133  C.2   1 RES1    0.0000
    19  N     2.2651     1.4173     0.0069  N.2   1 RES1    0.0000
    20  C     3.3639     0.7248     0.0021  C.2   1 RES1    0.0000
    21  C     3.3657    -0.7438    -0.0076  C.2   1 RES1    0.0000
    22  N     2.2705    -1.4379    -0.0155  N.2   1 RES1    0.0000
    23  N     4.5639     1.3580     0.0044  N.pl3 1 RES1    0.0000
    24  C     5.7746     0.6961    -0.0073  C.2   1 RES1    0.0000
    25  C     5.7772    -0.7059     0.0085  C.2   1 RES1    0.0000
    26  N     4.5702    -1.3728    -0.0065  N.pl3 1 RES1    0.0000
    27  N     6.8969     1.3790    -0.0631  N.2   1 RES1    0.0000
    28  C     8.0578     0.7141    -0.0697  C.2   1 RES1    0.0000
    29  C     8.0608    -0.7121     0.0760  C.2   1 RES1    0.0000
    30  N     6.9031    -1.3828     0.0668  N.2   1 RES1    0.0000
    31  C    -9.2773    -1.5553    -0.2743  C.2   1 RES1    0.0000
    32  C    -9.3443    -2.8137     0.3351  C.2   1 RES1    0.0000
    33  C   -10.4531    -3.6240     0.1461  C.2   1 RES1    0.0000
    34  C   -11.4947    -3.2026    -0.6747  C.2   1 RES1    0.0000
    35  C   -11.4240    -1.9651    -1.3055  C.2   1 RES1    0.0000
    36  C   -10.3274    -1.1404    -1.1014  C.2   1 RES1    0.0000
    37  H    -8.5208    -3.1483     0.9510  H     1 RES1    0.0000
    38  H   -10.5010    -4.5895     0.6324  H     1 RES1    0.0000
    39  H   -12.3553    -3.8405    -0.8292  H     1 RES1    0.0000
    40  H   -12.2211    -1.6438    -1.9630  H     1 RES1    0.0000
    41  H   -10.2799    -0.1878    -1.6112  H     1 RES1    0.0000
    42  C    -9.2656     1.5348     0.2630  C.2   1 RES1    0.0000
    43  C   -10.2777     1.1509     1.1538  C.2   1 RES1    0.0000
    44  C   -11.3429     2.0018     1.3999  C.2   1 RES1    0.0000
    45  C   -11.4279     3.2286     0.7481  C.2   1 RES1    0.0000
    46  C   -10.4348     3.6127    -0.1472  C.2   1 RES1    0.0000
    47  C    -9.3532     2.7781    -0.3821  C.2   1 RES1    0.0000
    48  H   -10.2174     0.2016     1.6665  H     1 RES1    0.0000
    49  H   -12.1101     1.7066     2.1031  H     1 RES1    0.0000
    50  H   -12.2689     3.8833     0.9352  H     1 RES1    0.0000
    51  H   -10.5055     4.5589    -0.6667  H     1 RES1    0.0000
    52  H    -8.6014     3.0742    -1.1044  H     1 RES1    0.0000
    53  C     9.2642     1.5432    -0.2750  C.2   1 RES1    0.0000
    54  C     9.3545     2.7940     0.3464  C.2   1 RES1    0.0000
    55  C    10.4550     3.6096     0.1296  C.2   1 RES1    0.0000
    56  C    11.4680     3.2005    -0.7316  C.2   1 RES1    0.0000
    57  C    11.3759     1.9694    -1.3724  C.2   1 RES1    0.0000
    58  C    10.2876     1.1412    -1.1409  C.2   1 RES1    0.0000
    59  H     8.5592     3.1182     1.0039  H     1 RES1    0.0000
    60  H    10.5206     4.5675     0.6291  H     1 RES1    0.0000
    61  H    12.3231     3.8405    -0.9067  H     1 RES1    0.0000
    62  H    12.1528     1.6536    -2.0564  H     1 RES1    0.0000
    63  H    10.2257     0.1887    -1.6489  H     1 RES1    0.0000
    64  C     9.2704    -1.5356     0.2840  C.2   1 RES1    0.0000
    65  C    10.2923    -1.1270     1.1487  C.2   1 RES1    0.0000
    66  C    11.3836    -1.9505     1.3829  C.2   1 RES1    0.0000
    67  C    11.4803    -3.1832     0.7459  C.2   1 RES1    0.0000
    68  C    10.4688    -3.5988    -0.1142  C.2   1 RES1    0.0000
    69  C     9.3653    -2.7881    -0.3334  C.2   1 RES1    0.0000
    70  H    10.2269    -0.1733     1.6539  H     1 RES1    0.0000
    71  H    12.1592    -1.6298     2.0660  H     1 RES1    0.0000
    72  H    12.3377    -3.8196     0.9231  H     1 RES1    0.0000
    73  H    10.5379    -4.5580    -0.6105  H     1 RES1    0.0000
    74  H     8.5712    -3.1173    -0.9897  H     1 RES1    0.0000
    75  H     4.5760    -2.3876     0.0055  H     1 RES1    0.0000
    76  H     4.5659     2.3729    -0.0076  H     1 RES1    0.0000
    77  H    -6.8635     2.3168     0.2201  H     1 RES1    0.0000
@<TRIPOS>BOND
     1      1      2      1
     2      1     18      1
     3      2      3      1
     4      2      5      1
     5      3      4      1
     6      3      8      1
     7      4     17      1
     8      5      6      1
     9      6      7      1
    10      6      9      1
    11      7      8      1
    12      7     12      1
    13      9     10      1
    14     10     11      1
    15     10     13      1
    16     11     12      1
    17     11     16      1
    18     13     14      1
    19     14     15      1
    20     14     31      1
    21     15     16      1
    22     15     42      1
    23     16     77      1
    24     17     18      1
    25     17     19      1
    26     18     22      1
    27     19     20      1
    28     20     21      1
    29     20     23      1
    30     21     22      1
    31     21     26      1
    32     23     24      1
    33     23     76      1
    34     24     25      1
    35     24     27      1
    36     25     26      1
    37     25     30      1
    38     26     75      1
    39     27     28      1
    40     28     29      1
    41     28     53      1
    42     29     30      1
    43     29     64      1
    44     31     32      1
    45     31     36      1
    46     32     33      1
    47     32     37      1
    48     33     34      1
    49     33     38      1
    50     34     35      1
    51     34     39      1
    52     35     36      1
    53     35     40      1
    54     36     41      1
    55     42     43      1
    56     42     47      1
    57     43     44      1
    58     43     48      1
    59     44     45      1
    60     44     49      1
    61     45     46      1
    62     45     50      1
    63     46     47      1
    64     46     51      1
    65     47     52      1
    66     53     54      1
    67     53     58      1
    68     54     55      1
    69     54     59      1
    70     55     56      1
    71     55     60      1
    72     56     57      1
    73     56     61      1
    74     57     58      1
    75     57     62      1
    76     58     63      1
    77     64     65      1
    78     64     69      1
    79     65     66      1
    80     65     70      1
    81     66     67      1
    82     66     71      1
    83     67     68      1
    84     67     72      1
    85     68     69      1
    86     68     73      1
    87     69     74      1
@<TRIPOS>SUBSTRUCTURE
      1 RES1       1

N14Ph4H2_B3LYP_Def2_TZVP_H_+1_Is1.mol
@<TRIPOS>MOLECULE
 T0-H1 ground state (Ph4H3N14HEPT,+1)
    77     87      1
 SMALL
 NO_CHARGES
 ****
 ****
@<TRIPOS>ATOM
     1  N     0.0127     1.3656     0.0230  N.pl3 1 RES1    0.0000
     2  C     1.2401     0.7284     0.0097  C.2   1 RES1    0.0000
     3  C     1.2560    -0.7023    -0.0043  C.2   1 RES1    0.0000
     4  N     0.0225    -1.3743    -0.0143  N.pl3 1 RES1    0.0000
     5  C    -1.1502    -0.7312    -0.0045  C.2   1 RES1    0.0000
     6  C    -1.1946     0.7197     0.0183  C.2   1 RES1    0.0000
     7  N     2.3342     1.4206     0.0078  N.2   1 RES1    0.0000
     8  C     3.5091     0.7289    -0.0058  C.2   1 RES1    0.0000
     9  C     3.5144    -0.7175     0.0059  C.2   1 RES1    0.0000
    10  N     2.3361    -1.4056    -0.0050  N.2   1 RES1    0.0000
    11  N     4.6384     1.4248    -0.0480  N.2   1 RES1    0.0000
    12  C     5.7681     0.7226    -0.0553  C.2   1 RES1    0.0000
    13  C     5.7702    -0.7169     0.0526  C.2   1 RES1    0.0000
    14  N     4.6405    -1.4177     0.0469  N.2   1 RES1    0.0000
    15  N     6.9340     1.3841    -0.2326  N.2   1 RES1    0.0000
    16  C     8.0579     0.7152    -0.2018  C.2   1 RES1    0.0000
    17  C     8.0595    -0.7081     0.1993  C.2   1 RES1    0.0000
    18  N     6.9371    -1.3783     0.2298  N.2   1 RES1    0.0000
    19  N    -2.3189    -1.3685    -0.0165  N.pl3 1 RES1    0.0000
    20  C    -3.5383    -0.6942    -0.0090  C.2   1 RES1    0.0000
    21  C    -3.4959     0.7319     0.0305  C.2   1 RES1    0.0000
    22  N    -2.3021     1.3933     0.0345  N.2   1 RES1    0.0000
    23  N    -4.6252    -1.4142    -0.0544  N.2   1 RES1    0.0000
    24  C    -5.7759    -0.7163    -0.0492  C.2   1 RES1    0.0000
    25  C    -5.7632     0.7167     0.0705  C.2   1 RES1    0.0000
    26  N    -4.6239     1.4188     0.0776  N.2   1 RES1    0.0000
    27  N    -6.9297    -1.3782    -0.2217  N.2   1 RES1    0.0000
    28  C    -8.0588    -0.7052    -0.1934  C.2   1 RES1    0.0000
    29  C    -8.0546     0.7129     0.2039  C.2   1 RES1    0.0000
    30  N    -6.9249     1.3782     0.2417  N.2   1 RES1    0.0000
    31  N     9.2649     1.4421    -0.6358  N.pl3 1 RES1    0.0000
    32  C     9.3590     2.8190    -0.3889  C.2   1 RES1    0.0000
    33  C    10.4540     3.5383    -0.8387  C.2   1 RES1    0.0000
    34  C    11.4546     2.9038    -1.5700  C.2   1 RES1    0.0000
    35  C    11.3572     1.5438    -1.8447  C.2   1 RES1    0.0000
    36  C    10.2778     0.8128    -1.3718  C.2   1 RES1    0.0000
    37  H     8.5663     3.3090     0.1588  H     1 RES1    0.0000
    38  H    10.5257     4.5970    -0.6261  H     1 RES1    0.0000
    39  H    12.3051     3.4690    -1.9288  H     1 RES1    0.0000
    40  H    12.1238     1.0509    -2.4280  H     1 RES1    0.0000
    41  H    10.2129    -0.2425    -1.5964  H     1 RES1    0.0000
    42  C     9.2693    -1.4326     0.6316  C.2   1 RES1    0.0000
    43  C    10.2748    -0.8030     1.3769  C.2   1 RES1    0.0000
    44  C    11.3575    -1.5309     1.8477  C.2   1 RES1    0.0000
    45  C    11.4651    -2.8877     1.5618  C.2   1 RES1    0.0000
    46  C    10.4716    -3.5223     0.8210  C.2   1 RES1    0.0000
    47  C     9.3736    -2.8061     0.3729  C.2   1 RES1    0.0000
    48  H    10.2020     0.2500     1.6099  H     1 RES1    0.0000
    49  H    12.1185    -1.0378     2.4381  H     1 RES1    0.0000
    50  H    12.3180    -3.4504     1.9191  H     1 RES1    0.0000
    51  H    10.5513    -4.5786     0.5994  H     1 RES1    0.0000
    52  H     8.5866    -3.2966    -0.1827  H     1 RES1    0.0000
    53  C    -9.2632    -1.4329    -0.6270  C.2   1 RES1    0.0000
    54  C    -9.3628    -2.8082    -0.3721  C.2   1 RES1    0.0000
    55  C   -10.4586    -3.5267    -0.8207  C.2   1 RES1    0.0000
    56  C   -11.4544    -2.8934    -1.5597  C.2   1 RES1    0.0000
    57  C   -11.3517    -1.5352    -1.8425  C.2   1 RES1    0.0000
    58  C   -10.2721    -0.8047    -1.3704  C.2   1 RES1    0.0000
    59  H    -8.5760    -3.2980     0.1841  H     1 RES1    0.0000
    60  H   -10.5356    -4.5835    -0.6006  H     1 RES1    0.0000
    61  H   -12.3057    -3.4579    -1.9177  H     1 RES1    0.0000
    62  H   -12.1146    -1.0436    -2.4316  H     1 RES1    0.0000
    63  H   -10.2031     0.2490    -1.6010  H     1 RES1    0.0000
    64  C    -9.2610     1.4487     0.6247  C.2   1 RES1    0.0000
    65  C   -10.2774     0.8303     1.3651  C.2   1 RES1    0.0000
    66  C   -11.3566     1.5692     1.8254  C.2   1 RES1    0.0000
    67  C   -11.4499     2.9262     1.5341  C.2   1 RES1    0.0000
    68  C   -10.4455     3.5496     0.7986  C.2   1 RES1    0.0000
    69  C    -9.3507     2.8224     0.3609  C.2   1 RES1    0.0000
    70  H   -10.2155    -0.2224     1.6031  H     1 RES1    0.0000
    71  H   -12.1261     1.0854     2.4125  H     1 RES1    0.0000
    72  H   -12.3000     3.4977     1.8836  H     1 RES1    0.0000
    73  H   -10.5139     4.6059     0.5734  H     1 RES1    0.0000
    74  H    -8.5558     3.3050    -0.1904  H     1 RES1    0.0000
    75  H     0.0034     2.3794     0.0354  H     1 RES1    0.0000
    76  H     0.0811    -2.3876    -0.0257  H     1 RES1    0.0000
    77  H    -2.3779    -2.3823    -0.0437  H     1 RES1    0.0000
@<TRIPOS>BOND
     1      1      2      1
     2      1      6      1
     3      1     75      1
     4      2      3      1
     5      2      7      1
     6      3      4      1
     7      3     10      1
     8      4      5      1
     9      4     76      1
    10      5      6      2
    11      5     19      1
    12      6     22      1
    13      7      8      1
    14      8      9      1
    15      8     11      1
    16      9     10      1
    17      9     14      1
    18     11     12      1
    19     12     13      1
    20     12     15      1
    21     13     14      1
    22     13     18      1
    23     15     16      1
    24     16     17      1
    25     16     31      1
    26     17     18      1
    27     17     42      1
    28     19     20      1
    29     19     77      1
    30     20     21      1
    31     20     23      1
    32     21     22      1
    33     21     26      1
    34     23     24      1
    35     24     25      1
    36     24     27      1
    37     25     26      1
    38     25     30      1
    39     27     28      1
    40     28     29      1
    41     28     53      1
    42     29     30      1
    43     29     64      1
    44     31     32      1
    45     31     36      1
    46     32     33      2
    47     32     37      1
    48     33     34      1
    49     33     38      1
    50     34     35      1
    51     34     39      1
    52     35     36      2
    53     35     40      1
    54     36     41      1
    55     42     43      1
    56     42     47      1
    57     43     44      1
    58     43     48      1
    59     44     45      1
    60     44     49      1
    61     45     46      1
    62     45     50      1
    63     46     47      1
    64     46     51      1
    65     47     52      1
    66     53     54      1
    67     53     58      1
    68     54     55      1
    69     54     59      1
    70     55     56      1
    71     55     60      1
    72     56     57      1
    73     56     61      1
    74     57     58      1
    75     57     62      1
    76     58     63      1
    77     64     65      1
    78     64     69      1
    79     65     66      1
    80     65     70      1
    81     66     67      1
    82     66     71      1
    83     67     68      1
    84     67     72      1
    85     68     69      1
    86     68     73      1
    87     69     74      1
@<TRIPOS>SUBSTRUCTURE
      1 RES1       1

N14Ph4H2_B3LYP_Def2_TZVP_H_+1_Is2.mol
@<TRIPOS>MOLECULE
 T0-H2 ground state (Ph4H3N14HEPT,+1)
    77     87      1
 SMALL
 NO_CHARGES
 ****
 ****
@<TRIPOS>ATOM
     1  N     0.0220     1.3892     0.0777  N.pl3 1 RES1    0.0000
     2  C     1.2445     0.7418     0.0412  C.2   1 RES1    0.0000
     3  C     1.2457    -0.6920    -0.0243  C.2   1 RES1    0.0000
     4  N     0.0171    -1.3429    -0.0562  N.pl3 1 RES1    0.0000
     5  C    -1.1690    -0.7067    -0.0235  C.2   1 RES1    0.0000
     6  C    -1.1804     0.7513     0.0502  C.2   1 RES1    0.0000
     7  N     2.3390     1.4325     0.0639  N.2   1 RES1    0.0000
     8  C     3.5108     0.7379     0.0247  C.2   1 RES1    0.0000
     9  C     3.5080    -0.7087    -0.0165  C.2   1 RES1    0.0000
    10  N     2.3308    -1.3941    -0.0511  N.2   1 RES1    0.0000
    11  N     4.6421     1.4319     0.0080  N.2   1 RES1    0.0000
    12  C     5.7693     0.7270    -0.0254  C.2   1 RES1    0.0000
    13  C     5.7656    -0.7152     0.0262  C.2   1 RES1    0.0000
    14  N     4.6340    -1.4120    -0.0033  N.2   1 RES1    0.0000
    15  N     6.9380     1.3917    -0.1746  N.2   1 RES1    0.0000
    16  C     8.0592     0.7182    -0.1705  C.2   1 RES1    0.0000
    17  C     8.0557    -0.7209     0.1654  C.2   1 RES1    0.0000
    18  N     6.9310    -1.3876     0.1724  N.2   1 RES1    0.0000
    19  N    -2.2874    -1.3987    -0.0588  N.2   1 RES1    0.0000
    20  C    -3.4159    -0.6893    -0.0206  C.2   1 RES1    0.0000
    21  C    -3.4601     0.7513     0.0606  C.2   1 RES1    0.0000
    22  N    -2.2850     1.4344     0.0895  N.2   1 RES1    0.0000
    23  N    -4.5917    -1.3419    -0.0694  N.pl3 1 RES1    0.0000
    24  C    -5.7851    -0.6821    -0.0426  C.2   1 RES1    0.0000
    25  C    -5.7508     0.7312     0.0859  C.2   1 RES1    0.0000
    26  N    -4.5983     1.4192     0.1136  N.2   1 RES1    0.0000
    27  N    -6.9031    -1.3734    -0.1918  N.2   1 RES1    0.0000
    28  C    -8.0520    -0.7095    -0.1631  C.2   1 RES1    0.0000
    29  C    -8.0500     0.7130     0.1807  C.2   1 RES1    0.0000
    30  N    -6.9168     1.3826     0.2290  N.2   1 RES1    0.0000
    31  C     9.2705     1.4613    -0.5667  C.2   1 RES1    0.0000
    32  C     9.3727     2.8220    -0.2462  C.2   1 RES1    0.0000
    33  C    10.4715     3.5585    -0.6578  C.2   1 RES1    0.0000
    34  C    11.4682     2.9588    -1.4229  C.2   1 RES1    0.0000
    35  C    11.3627     1.6161    -1.7701  C.2   1 RES1    0.0000
    36  C    10.2791     0.8670    -1.3364  C.2   1 RES1    0.0000
    37  H     8.5829     3.2864     0.3275  H     1 RES1    0.0000
    38  H    10.5491     4.6039    -0.3888  H     1 RES1    0.0000
    39  H    12.3217     3.5377    -1.7516  H     1 RES1    0.0000
    40  H    12.1261     1.1508    -2.3797  H     1 RES1    0.0000
    41  H    10.2079    -0.1744    -1.6172  H     1 RES1    0.0000
    42  C     9.2648    -1.4706     0.5574  C.2   1 RES1    0.0000
    43  C    10.2750    -0.8832     1.3301  C.2   1 RES1    0.0000
    44  C    11.3566    -1.6376     1.7597  C.2   1 RES1    0.0000
    45  C    11.4584    -2.9787     1.4054  C.2   1 RES1    0.0000
    46  C    10.4599    -3.5714     0.6372  C.2   1 RES1    0.0000
    47  C     9.3632    -2.8295     0.2295  C.2   1 RES1    0.0000
    48  H    10.2067     0.1570     1.6162  H     1 RES1    0.0000
    49  H    12.1215    -1.1775     2.3715  H     1 RES1    0.0000
    50  H    12.3104    -3.5617     1.7309  H     1 RES1    0.0000
    51  H    10.5346    -4.6156     0.3626  H     1 RES1    0.0000
    52  H     8.5721    -3.2886    -0.3468  H     1 RES1    0.0000
    53  C    -9.2483    -1.4738    -0.5414  C.2   1 RES1    0.0000
    54  C    -9.3327    -2.8334    -0.2062  C.2   1 RES1    0.0000
    55  C   -10.4257    -3.5868    -0.6005  C.2   1 RES1    0.0000
    56  C   -11.4340    -3.0064    -1.3654  C.2   1 RES1    0.0000
    57  C   -11.3472    -1.6658    -1.7274  C.2   1 RES1    0.0000
    58  C   -10.2715    -0.8987    -1.3093  C.2   1 RES1    0.0000
    59  H    -8.5414    -3.2851     0.3755  H     1 RES1    0.0000
    60  H   -10.4915    -4.6290    -0.3168  H     1 RES1    0.0000
    61  H   -12.2831    -3.5985    -1.6813  H     1 RES1    0.0000
    62  H   -12.1204    -1.2165    -2.3365  H     1 RES1    0.0000
    63  H   -10.2146     0.1403    -1.6009  H     1 RES1    0.0000
    64  C    -9.2659     1.4716     0.5352  C.2   1 RES1    0.0000
    65  C   -10.2842     0.9046     1.3121  C.2   1 RES1    0.0000
    66  C   -11.3720     1.6694     1.7055  C.2   1 RES1    0.0000
    67  C   -11.4702     2.9999     1.3118  C.2   1 RES1    0.0000
    68  C   -10.4628     3.5720     0.5403  C.2   1 RES1    0.0000
    69  C    -9.3600     2.8200     0.1677  C.2   1 RES1    0.0000
    70  H   -10.2179    -0.1264     1.6310  H     1 RES1    0.0000
    71  H   -12.1434     1.2268     2.3219  H     1 RES1    0.0000
    72  H   -12.3262     3.5911     1.6104  H     1 RES1    0.0000
    73  H   -10.5339     4.6081     0.2362  H     1 RES1    0.0000
    74  H    -8.5632     3.2663    -0.4110  H     1 RES1    0.0000
    75  H     0.0251     2.4026     0.1260  H     1 RES1    0.0000
    76  H     0.0295    -2.3568    -0.1037  H     1 RES1    0.0000
    77  H    -4.5946    -2.3547    -0.1580  H     1 RES1    0.0000
@<TRIPOS>BOND
     1      1      2      1
     2      1      6      1
     3      1     75      1
     4      2      3      1
     5      2      7      1
     6      3      4      1
     7      3     10      1
     8      4      5      1
     9      4     76      1
    10      5      6      1
    11      5     19      1
    12      6     22      1
    13      7      8      1
    14      8      9      1
    15      8     11      1
    16      9     10      1
    17      9     14      1
    18     11     12      1
    19     12     13      1
    20     12     15      1
    21     13     14      1
    22     13     18      1
    23     15     16      1
    24     16     17      1
    25     16     31      1
    26     17     18      1
    27     17     42      1
    28     19     20      1
    29     20     21      1
    30     20     23      1
    31     21     22      1
    32     21     26      1
    33     23     24      1
    34     23     77      1
    35     24     25      1
    36     24     27      1
    37     25     26      1
    38     25     30      1
    39     27     28      1
    40     28     29      1
    41     28     53      1
    42     29     30      1
    43     29     64      1
    44     31     32      1
    45     31     36      1
    46     32     33      1
    47     32     37      1
    48     33     34      1
    49     33     38      1
    50     34     35      1
    51     34     39      1
    52     35     36      1
    53     35     40      1
    54     36     41      1
    55     42     43      1
    56     42     47      1
    57     43     44      1
    58     43     48      1
    59     44     45      1
    60     44     49      1
    61     45     46      1
    62     45     50      1
    63     46     47      1
    64     46     51      1
    65     47     52      1
    66     53     54      1
    67     53     58      1
    68     54     55      1
    69     54     59      1
    70     55     56      1
    71     55     60      1
    72     56     57      1
    73     56     61      1
    74     57     58      1
    75     57     62      1
    76     58     63      1
    77     64     65      1
    78     64     69      1
    79     65     66      1
    80     65     70      1
    81     66     67      1
    82     66     71      1
    83     67     68      1
    84     67     72      1
    85     68     69      1
    86     68     73      1
    87     69     74      1
@<TRIPOS>SUBSTRUCTURE
      1 RES1       1

N14Ph4H2_B3LYP_Def2_TZVP_H_+1_Is3.mol
@<TRIPOS>MOLECULE
 T1-H1 ground state (Ph4H3N14HEPT,+1)
    77     87      1
 SMALL
 NO_CHARGES
 ****
 ****
@<TRIPOS>ATOM
     1  N     0.0199     1.4407     0.0678  N.2   1 RES1    0.0000
     2  C     1.1983     0.7598     0.0276  C.2   1 RES1    0.0000
     3  C     1.1533    -0.6878    -0.0457  C.2   1 RES1    0.0000
     4  N     0.0250    -1.3957    -0.0818  N.2   1 RES1    0.0000
     5  C    -1.0937    -0.7019    -0.0441  C.2   1 RES1    0.0000
     6  C    -1.0824     0.7563     0.0343  C.2   1 RES1    0.0000
     7  N     2.3299     1.4270     0.0532  N.2   1 RES1    0.0000
     8  C     3.4969     0.7499     0.0128  C.2   1 RES1    0.0000
     9  C     3.5314    -0.6879    -0.0375  C.2   1 RES1    0.0000
    10  N     2.3251    -1.3394    -0.0748  N.pl3 1 RES1    0.0000
    11  N     4.6409     1.4329     0.0013  N.2   1 RES1    0.0000
    12  C     5.7664     0.7281    -0.0350  C.2   1 RES1    0.0000
    13  C     5.7712    -0.7172     0.0087  C.2   1 RES1    0.0000
    14  N     4.6265    -1.4110    -0.0321  N.2   1 RES1    0.0000
    15  N     6.9361     1.3894    -0.1858  N.2   1 RES1    0.0000
    16  C     8.0585     0.7176    -0.1837  C.2   1 RES1    0.0000
    17  C     8.0545    -0.7184     0.1678  C.2   1 RES1    0.0000
    18  N     6.9247    -1.3880     0.1587  N.2   1 RES1    0.0000
    19  N    -2.2782    -1.3371    -0.0782  N.pl3 1 RES1    0.0000
    20  C    -3.5058    -0.6857    -0.0452  C.2   1 RES1    0.0000
    21  C    -3.5061     0.7381     0.0440  C.2   1 RES1    0.0000
    22  N    -2.2874     1.3905     0.0725  N.pl3 1 RES1    0.0000
    23  N    -4.5972    -1.3903    -0.1071  N.2   1 RES1    0.0000
    24  C    -5.7590    -0.6986    -0.0739  C.2   1 RES1    0.0000
    25  C    -5.7635     0.7216     0.0764  C.2   1 RES1    0.0000
    26  N    -4.6093     1.4272     0.1072  N.2   1 RES1    0.0000
    27  N    -6.9079    -1.3681    -0.2399  N.2   1 RES1    0.0000
    28  C    -8.0450    -0.7059    -0.1891  C.2   1 RES1    0.0000
    29  C    -8.0504     0.7059     0.1919  C.2   1 RES1    0.0000
    30  N    -6.9186     1.3789     0.2425  N.2   1 RES1    0.0000
    31  C     9.2673     1.4533    -0.5939  C.2   1 RES1    0.0000
    32  C     9.3654     2.8220    -0.3056  C.2   1 RES1    0.0000
    33  C    10.4622     3.5506    -0.7346  C.2   1 RES1    0.0000
    34  C    11.4603     2.9349    -1.4857  C.2   1 RES1    0.0000
    35  C    11.3587     1.5840    -1.8015  C.2   1 RES1    0.0000
    36  C    10.2775     0.8427    -1.3500  C.2   1 RES1    0.0000
    37  H     8.5750     3.2981     0.2576  H     1 RES1    0.0000
    38  H    10.5376     4.6022    -0.4908  H     1 RES1    0.0000
    39  H    12.3120     3.5082    -1.8285  H     1 RES1    0.0000
    40  H    12.1230     1.1071    -2.4009  H     1 RES1    0.0000
    41  H    10.2082    -0.2048    -1.6081  H     1 RES1    0.0000
    42  C     9.2489    -1.4583     0.5987  C.2   1 RES1    0.0000
    43  C    10.2658    -0.8441     1.3452  C.2   1 RES1    0.0000
    44  C    11.3355    -1.5891     1.8159  C.2   1 RES1    0.0000
    45  C    11.4219    -2.9476     1.5282  C.2   1 RES1    0.0000
    46  C    10.4190    -3.5673     0.7863  C.2   1 RES1    0.0000
    47  C     9.3323    -2.8354     0.3400  C.2   1 RES1    0.0000
    48  H    10.2084     0.2089     1.5812  H     1 RES1    0.0000
    49  H    12.1035    -1.1092     2.4079  H     1 RES1    0.0000
    50  H    12.2661    -3.5234     1.8849  H     1 RES1    0.0000
    51  H    10.4843    -4.6242     0.5629  H     1 RES1    0.0000
    52  H     8.5396    -3.3130    -0.2183  H     1 RES1    0.0000
    53  C    -9.2530    -1.4599    -0.5809  C.2   1 RES1    0.0000
    54  C    -9.3501    -2.8182    -0.2534  C.2   1 RES1    0.0000
    55  C   -10.4477    -3.5612    -0.6586  C.2   1 RES1    0.0000
    56  C   -11.4488    -2.9689    -1.4230  C.2   1 RES1    0.0000
    57  C   -11.3484    -1.6274    -1.7762  C.2   1 RES1    0.0000
    58  C   -10.2652    -0.8731    -1.3504  C.2   1 RES1    0.0000
    59  H    -8.5590    -3.2788     0.3218  H     1 RES1    0.0000
    60  H   -10.5208    -4.6055    -0.3841  H     1 RES1    0.0000
    61  H   -12.3015    -3.5520    -1.7462  H     1 RES1    0.0000
    62  H   -12.1155    -1.1669    -2.3851  H     1 RES1    0.0000
    63  H   -10.1981     0.1677    -1.6352  H     1 RES1    0.0000
    64  C    -9.2629     1.4497     0.5862  C.2   1 RES1    0.0000
    65  C   -10.2779     0.8510     1.3434  C.2   1 RES1    0.0000
    66  C   -11.3653     1.5973     1.7721  C.2   1 RES1    0.0000
    67  C   -11.4677     2.9425     1.4334  C.2   1 RES1    0.0000
    68  C   -10.4643     3.5467     0.6813  C.2   1 RES1    0.0000
    69  C    -9.3622     2.8119     0.2740  C.2   1 RES1    0.0000
    70  H   -10.2092    -0.1925     1.6173  H     1 RES1    0.0000
    71  H   -12.1341     1.1280     2.3718  H     1 RES1    0.0000
    72  H   -12.3237     3.5195     1.7587  H     1 RES1    0.0000
    73  H   -10.5390     4.5939     0.4186  H     1 RES1    0.0000
    74  H    -8.5690     3.2814    -0.2909  H     1 RES1    0.0000
    75  H    -2.2917     2.4031     0.1347  H     1 RES1    0.0000
    76  H    -2.2887    -2.3505    -0.1402  H     1 RES1    0.0000
    77  H     2.3309    -2.3552    -0.1136  H     1 RES1    0.0000
@<TRIPOS>BOND
     1      1      2      1
     2      1      6      1
     3      2      3      1
     4      2      7      1
     5      3      4      1
     6      3     10      1
     7      4      5      1
     8      5      6      1
     9      5     19      1
    10      6     22      1
    11      7      8      1
    12      8      9      1
    13      8     11      1
    14      9     10      1
    15      9     14      1
    16     10     77      1
    17     11     12      1
    18     12     13      1
    19     12     15      1
    20     13     14      1
    21     13     18      1
    22     15     16      1
    23     16     17      1
    24     16     31      1
    25     17     18      1
    26     17     42      1
    27     19     20      1
    28     19     76      1
    29     20     21      1
    30     20     23      1
    31     21     22      1
    32     21     26      1
    33     22     75      1
    34     23     24      1
    35     24     25      1
    36     24     27      1
    37     25     26      1
    38     25     30      1
    39     27     28      1
    40     28     29      1
    41     28     53      1
    42     29     30      1
    43     29     64      1
    44     31     32      1
    45     31     36      1
    46     32     33      1
    47     32     37      1
    48     33     34      1
    49     33     38      1
    50     34     35      1
    51     34     39      1
    52     35     36      1
    53     35     40      1
    54     36     41      1
    55     42     43      1
    56     42     47      1
    57     43     44      1
    58     43     48      1
    59     44     45      1
    60     44     49      1
    61     45     46      1
    62     45     50      1
    63     46     47      1
    64     46     51      1
    65     47     52      1
    66     53     54      1
    67     53     58      1
    68     54     55      1
    69     54     59      1
    70     55     56      1
    71     55     60      1
    72     56     57      1
    73     56     61      1
    74     57     58      1
    75     57     62      1
    76     58     63      1
    77     64     65      1
    78     64     69      1
    79     65     66      1
    80     65     70      1
    81     66     67      1
    82     66     71      1
    83     67     68      1
    84     67     72      1
    85     68     69      1
    86     68     73      1
    87     69     74      1
@<TRIPOS>SUBSTRUCTURE
      1 RES1       1

N14Ph4H2_B3LYP_Def2_TZVP_H_+1_Is3_TDDFT_Root1.mol
@<TRIPOS>MOLECULE
 T1-H1 excited state 1 (Ph4H3N14HEPT,+1)
    77     87      1
 SMALL
 NO_CHARGES
 ****
 ****
@<TRIPOS>ATOM
     1  C     9.4378    -2.7668     0.0704  C.2   1 RES1    0.0000
     2  C     9.2781    -1.4542     0.5226  C.2   1 RES1    0.0000
     3  C    10.2727    -0.8874     1.3473  C.2   1 RES1    0.0000
     4  C    11.4093    -1.6093     1.6795  C.2   1 RES1    0.0000
     5  C    11.5686    -2.9045     1.2043  C.2   1 RES1    0.0000
     6  C    10.5765    -3.4823     0.4001  C.2   1 RES1    0.0000
     7  C     8.0456    -0.6985     0.1891  C.2   1 RES1    0.0000
     8  C     8.0460     0.6819    -0.1666  C.2   1 RES1    0.0000
     9  N     6.9081     1.3585    -0.2520  N.2   1 RES1    0.0000
    10  C     5.7648     0.6929    -0.0975  C.2   1 RES1    0.0000
    11  C     5.7625    -0.7067     0.1172  C.2   1 RES1    0.0000
    12  N     6.9078    -1.3714     0.2789  N.2   1 RES1    0.0000
    13  N     4.5893    -1.4083     0.1888  N.2   1 RES1    0.0000
    14  C     3.4959    -0.7269     0.0912  C.2   1 RES1    0.0000
    15  C     3.5002     0.7170    -0.0761  C.2   1 RES1    0.0000
    16  N     4.5895     1.3986    -0.1719  N.2   1 RES1    0.0000
    17  N     2.2781    -1.3704     0.1477  N.pl3 1 RES1    0.0000
    18  C     1.0675    -0.7159     0.0744  C.2   1 RES1    0.0000
    19  C     1.0768     0.7199    -0.0751  C.2   1 RES1    0.0000
    20  N     2.2795     1.3725    -0.1368  N.pl3 1 RES1    0.0000
    21  N    -0.0333    -1.3989     0.1409  N.2   1 RES1    0.0000
    22  C    -1.2133    -0.7218     0.0640  C.2   1 RES1    0.0000
    23  C    -1.1718     0.6980    -0.0817  C.2   1 RES1    0.0000
    24  N    -0.0379     1.4035    -0.1511  N.2   1 RES1    0.0000
    25  N    -2.3549     1.3571    -0.1473  N.pl3 1 RES1    0.0000
    26  C    -3.5524     0.7068    -0.0760  C.2   1 RES1    0.0000
    27  C    -3.5108    -0.7401     0.0447  C.2   1 RES1    0.0000
    28  N    -2.3503    -1.4069     0.1222  N.2   1 RES1    0.0000
    29  N    -4.6518     1.4205    -0.1041  N.2   1 RES1    0.0000
    30  C    -5.7972     0.7205    -0.0283  C.2   1 RES1    0.0000
    31  C    -5.7855    -0.7262    -0.0085  C.2   1 RES1    0.0000
    32  N    -4.6565    -1.4259     0.0620  N.2   1 RES1    0.0000
    33  N    -6.9497     1.3893     0.0870  N.2   1 RES1    0.0000
    34  C    -8.0822     0.7146     0.1249  C.2   1 RES1    0.0000
    35  C    -8.0801    -0.7277    -0.1487  C.2   1 RES1    0.0000
    36  N    -6.9515    -1.3958    -0.1266  N.2   1 RES1    0.0000
    37  C    -9.2869    -1.4952    -0.5096  C.2   1 RES1    0.0000
    38  C    -9.3791    -2.8427    -0.1339  C.2   1 RES1    0.0000
    39  C   -10.4743    -3.6021    -0.5112  C.2   1 RES1    0.0000
    40  C   -11.4790    -3.0400    -1.2952  C.2   1 RES1    0.0000
    41  C   -11.3839    -1.7116    -1.6970  C.2   1 RES1    0.0000
    42  C   -10.3027    -0.9396    -1.3002  C.2   1 RES1    0.0000
    43  C    -9.2774     1.4782     0.5115  C.2   1 RES1    0.0000
    44  C   -10.2992     0.9085     1.2871  C.2   1 RES1    0.0000
    45  C   -11.3727     1.6778     1.7069  C.2   1 RES1    0.0000
    46  C   -11.4577     3.0181     1.3430  C.2   1 RES1    0.0000
    47  C   -10.4491     3.5951     0.5744  C.2   1 RES1    0.0000
    48  C    -9.3601     2.8391     0.1760  C.2   1 RES1    0.0000
    49  C     9.2716     1.4405    -0.5128  C.2   1 RES1    0.0000
    50  C     9.4187     2.7646    -0.0834  C.2   1 RES1    0.0000
    51  C    10.5509     3.4829    -0.4220  C.2   1 RES1    0.0000
    52  C    11.5494     2.8994    -1.2166  C.2   1 RES1    0.0000
    53  C    11.4023     1.5944    -1.6717  C.2   1 RES1    0.0000
    54  C    10.2733     0.8686    -1.3290  C.2   1 RES1    0.0000
    55  H    -8.5836    -3.2783     0.4542  H     1 RES1    0.0000
    56  H   -10.5436    -4.6366    -0.2008  H     1 RES1    0.0000
    57  H   -12.3296    -3.6376    -1.5970  H     1 RES1    0.0000
    58  H   -12.1525    -1.2768    -2.3226  H     1 RES1    0.0000
    59  H   -10.2365     0.0889    -1.6267  H     1 RES1    0.0000
    60  H   -10.2410    -0.1287     1.5847  H     1 RES1    0.0000
    61  H   -12.1442     1.2315     2.3205  H     1 RES1    0.0000
    62  H   -12.3038     3.6131     1.6619  H     1 RES1    0.0000
    63  H   -10.5120     4.6380     0.2923  H     1 RES1    0.0000
    64  H    -8.5633     3.2843    -0.4027  H     1 RES1    0.0000
    65  H     8.6383     3.2145     0.5141  H     1 RES1    0.0000
    66  H    10.6677     4.5014    -0.0759  H     1 RES1    0.0000
    67  H    12.4258     3.4739    -1.4868  H     1 RES1    0.0000
    68  H    12.1569     1.1505    -2.3070  H     1 RES1    0.0000
    69  H    10.1402    -0.1320    -1.7168  H     1 RES1    0.0000
    70  H    10.1310     0.1055     1.7526  H     1 RES1    0.0000
    71  H    12.1591    -1.1684     2.3227  H     1 RES1    0.0000
    72  H    12.4499    -3.4755     1.4657  H     1 RES1    0.0000
    73  H    10.7004    -4.4947     0.0386  H     1 RES1    0.0000
    74  H     8.6621    -3.2150    -0.5350  H     1 RES1    0.0000
    75  H     2.2707    -2.3761     0.2618  H     1 RES1    0.0000
    76  H     2.2864     2.3778    -0.2515  H     1 RES1    0.0000
    77  H    -2.3614     2.3682    -0.2344  H     1 RES1    0.0000
@<TRIPOS>BOND
     1      1      2      1
     2      1      6      1
     3      1     74      1
     4      2      3      1
     5      2      7      1
     6      3      4      1
     7      3     70      1
     8      4      5      1
     9      4     71      1
    10      5      6      1
    11      5     72      1
    12      6     73      1
    13      7      8      1
    14      7     12      1
    15      8      9      1
    16      8     49      1
    17      9     10      1
    18     10     11      1
    19     10     16      1
    20     11     12      1
    21     11     13      1
    22     13     14      1
    23     14     15      1
    24     14     17      1
    25     15     16      1
    26     15     20      1
    27     17     18      1
    28     17     75      1
    29     18     19      1
    30     18     21      1
    31     19     20      1
    32     19     24      1
    33     20     76      1
    34     21     22      1
    35     22     23      1
    36     22     28      1
    37     23     24      1
    38     23     25      1
    39     25     26      1
    40     25     77      1
    41     26     27      1
    42     26     29      1
    43     27     28      1
    44     27     32      1
    45     29     30      1
    46     30     31      1
    47     30     33      1
    48     31     32      1
    49     31     36      1
    50     33     34      1
    51     34     35      1
    52     34     43      1
    53     35     36      1
    54     35     37      1
    55     37     38      1
    56     37     42      1
    57     38     39      1
    58     38     55      1
    59     39     40      1
    60     39     56      1
    61     40     41      1
    62     40     57      1
    63     41     42      1
    64     41     58      1
    65     42     59      1
    66     43     44      1
    67     43     48      1
    68     44     45      1
    69     44     60      1
    70     45     46      1
    71     45     61      1
    72     46     47      1
    73     46     62      1
    74     47     48      1
    75     47     63      1
    76     48     64      1
    77     49     50      1
    78     49     54      1
    79     50     51      1
    80     50     65      1
    81     51     52      1
    82     51     66      1
    83     52     53      1
    84     52     67      1
    85     53     54      1
    86     53     68      1
    87     54     69      1
@<TRIPOS>SUBSTRUCTURE
      1 RES1       1

N14Ph4H2_B3LYP_Def2_TZVP_H_+1_Is4.mol
@<TRIPOS>MOLECULE
 T0-H0 ground state (Ph4H3N14HEPT,+1)
    77     87      1
 SMALL
 NO_CHARGES
 ****
 ****
@<TRIPOS>ATOM
     1  N    -0.0001     1.3390     0.0133  N.pl3 1 RES1    0.0000
     2  C     1.2087     0.6847     0.0047  C.2   1 RES1    0.0000
     3  C     1.2641    -0.7355     0.0119  C.2   1 RES1    0.0000
     4  N     0.0001    -1.5347     0.0164  N.4   1 RES1    0.0000
     5  N     2.3183     1.3727    -0.0110  N.2   1 RES1    0.0000
     6  C     3.4927     0.6985    -0.0166  C.2   1 RES1    0.0000
     7  C     3.5188    -0.7459     0.0202  C.2   1 RES1    0.0000
     8  N     2.3447    -1.4297     0.0222  N.2   1 RES1    0.0000
     9  N     4.6216     1.4045    -0.0769  N.2   1 RES1    0.0000
    10  C     5.7520     0.7107    -0.0745  C.2   1 RES1    0.0000
    11  C     5.7698    -0.7317     0.0713  C.2   1 RES1    0.0000
    12  N     4.6513    -1.4419     0.0778  N.2   1 RES1    0.0000
    13  N     6.9132     1.3729    -0.2835  N.2   1 RES1    0.0000
    14  C     8.0417     0.7146    -0.2377  C.2   1 RES1    0.0000
    15  C     8.0579    -0.6930     0.2329  C.2   1 RES1    0.0000
    16  N     6.9441    -1.3735     0.2785  N.2   1 RES1    0.0000
    17  C    -1.2641    -0.7356     0.0125  C.2   1 RES1    0.0000
    18  C    -1.2088     0.6846     0.0187  C.2   1 RES1    0.0000
    19  N    -2.3445    -1.4299    -0.0021  N.2   1 RES1    0.0000
    20  C    -3.5186    -0.7462    -0.0056  C.2   1 RES1    0.0000
    21  C    -3.4929     0.6982     0.0312  C.2   1 RES1    0.0000
    22  N    -2.3185     1.3725     0.0297  N.2   1 RES1    0.0000
    23  N    -4.6509    -1.4423    -0.0680  N.2   1 RES1    0.0000
    24  C    -5.7694    -0.7322    -0.0662  C.2   1 RES1    0.0000
    25  C    -5.7524     0.7102     0.0800  C.2   1 RES1    0.0000
    26  N    -4.6221     1.4040     0.0871  N.2   1 RES1    0.0000
    27  N    -6.9429    -1.3740    -0.2786  N.2   1 RES1    0.0000
    28  C    -8.0568    -0.6936    -0.2374  C.2   1 RES1    0.0000
    29  C    -8.0427     0.7138     0.2338  C.2   1 RES1    0.0000
    30  N    -6.9145     1.3722     0.2845  N.2   1 RES1    0.0000
    31  C     9.2360     1.4222    -0.7265  C.2   1 RES1    0.0000
    32  C     9.3109     2.8156    -0.5824  C.2   1 RES1    0.0000
    33  C    10.3940     3.5143    -1.0881  C.2   1 RES1    0.0000
    34  C    11.4010     2.8409    -1.7753  C.2   1 RES1    0.0000
    35  C    11.3226     1.4630    -1.9488  C.2   1 RES1    0.0000
    36  C    10.2562     0.7537    -1.4181  C.2   1 RES1    0.0000
    37  H     8.5135     3.3333    -0.0681  H     1 RES1    0.0000
    38  H    10.4521     4.5866    -0.9543  H     1 RES1    0.0000
    39  H    12.2422     3.3900    -2.1784  H     1 RES1    0.0000
    40  H    12.0942     0.9397    -2.4979  H     1 RES1    0.0000
    41  H    10.2059    -0.3159    -1.5647  H     1 RES1    0.0000
    42  C     9.2706    -1.3753     0.7158  C.2   1 RES1    0.0000
    43  C    10.2674    -0.6876     1.4215  C.2   1 RES1    0.0000
    44  C    11.3528    -1.3728     1.9461  C.2   1 RES1    0.0000
    45  C    11.4726    -2.7450     1.7529  C.2   1 RES1    0.0000
    46  C    10.4886    -3.4371     1.0515  C.2   1 RES1    0.0000
    47  C     9.3873    -2.7629     0.5510  C.2   1 RES1    0.0000
    48  H    10.1849     0.3780     1.5830  H     1 RES1    0.0000
    49  H    12.1066    -0.8348     2.5057  H     1 RES1    0.0000
    50  H    12.3282    -3.2749     2.1514  H     1 RES1    0.0000
    51  H    10.5788    -4.5051     0.9020  H     1 RES1    0.0000
    52  H     8.6079    -3.2964     0.0252  H     1 RES1    0.0000
    53  C    -9.2675    -1.3758    -0.7258  C.2   1 RES1    0.0000
    54  C    -9.3847    -2.7634    -0.5621  C.2   1 RES1    0.0000
    55  C   -10.4839    -3.4375    -1.0676  C.2   1 RES1    0.0000
    56  C   -11.4650    -2.7451    -1.7727  C.2   1 RES1    0.0000
    57  C   -11.3444    -1.3728    -1.9648  C.2   1 RES1    0.0000
    58  C   -10.2613    -0.6878    -1.4353  C.2   1 RES1    0.0000
    59  H    -8.6075    -3.2971    -0.0333  H     1 RES1    0.0000
    60  H   -10.5747    -4.5056    -0.9189  H     1 RES1    0.0000
    61  H   -12.3188    -3.2749    -2.1751  H     1 RES1    0.0000
    62  H   -12.0958    -0.8346    -2.5274  H     1 RES1    0.0000
    63  H   -10.1782     0.3779    -1.5960  H     1 RES1    0.0000
    64  C    -9.2391     1.4211     0.7179  C.2   1 RES1    0.0000
    65  C   -10.2622     0.7522     1.4049  C.2   1 RES1    0.0000
    66  C   -11.3308     1.4612     1.9315  C.2   1 RES1    0.0000
    67  C   -11.4085     2.8392     1.7583  C.2   1 RES1    0.0000
    68  C   -10.3988     3.5130     1.0757  C.2   1 RES1    0.0000
    69  C    -9.3135     2.8146     0.5742  C.2   1 RES1    0.0000
    70  H   -10.2124    -0.3174     1.5513  H     1 RES1    0.0000
    71  H   -12.1047     0.9375     2.4772  H     1 RES1    0.0000
    72  H   -12.2515     3.3880     2.1582  H     1 RES1    0.0000
    73  H   -10.4563     4.5853     0.9421  H     1 RES1    0.0000
    74  H    -8.5140     3.3325     0.0635  H     1 RES1    0.0000
    75  H    -0.0001     2.3514     0.0120  H     1 RES1    0.0000
    76  H     0.0020    -2.1572     0.8341  H     1 RES1    0.0000
    77  H    -0.0018    -2.1656    -0.7948  H     1 RES1    0.0000
@<TRIPOS>BOND
     1      1      2      1
     2      1     18      1
     3      1     75      1
     4      2      3      1
     5      2      5      1
     6      3      4      1
     7      3      8      1
     8      4     17      1
     9      4     76      1
    10      4     77      1
    11      5      6      1
    12      6      7      1
    13      6      9      1
    14      7      8      1
    15      7     12      1
    16      9     10      1
    17     10     11      1
    18     10     13      1
    19     11     12      1
    20     11     16      1
    21     13     14      1
    22     14     15      1
    23     14     31      1
    24     15     16      1
    25     15     42      1
    26     17     18      1
    27     17     19      1
    28     18     22      1
    29     19     20      1
    30     20     21      1
    31     20     23      1
    32     21     22      1
    33     21     26      1
    34     23     24      1
    35     24     25      1
    36     24     27      1
    37     25     26      1
    38     25     30      1
    39     27     28      1
    40     28     29      1
    41     28     53      1
    42     29     30      1
    43     29     64      1
    44     31     32      1
    45     31     36      1
    46     32     33      1
    47     32     37      1
    48     33     34      1
    49     33     38      1
    50     34     35      1
    51     34     39      1
    52     35     36      1
    53     35     40      1
    54     36     41      1
    55     42     43      1
    56     42     47      1
    57     43     44      1
    58     43     48      1
    59     44     45      1
    60     44     49      1
    61     45     46      1
    62     45     50      1
    63     46     47      1
    64     46     51      1
    65     47     52      1
    66     53     54      1
    67     53     58      1
    68     54     55      1
    69     54     59      1
    70     55     56      1
    71     55     60      1
    72     56     57      1
    73     56     61      1
    74     57     58      1
    75     57     62      1
    76     58     63      1
    77     64     65      1
    78     64     69      1
    79     65     66      1
    80     65     70      1
    81     66     67      1
    82     66     71      1
    83     67     68      1
    84     67     72      1
    85     68     69      1
    86     68     73      1
    87     69     74      1
@<TRIPOS>SUBSTRUCTURE
      1 RES1       1

N14Ph4H2_B3LYP_Def2_TZVP_H_+1_Is5.mol
@<TRIPOS>MOLECULE
 T0-H3 ground state (Ph4H3N14HEPT,+1)
    77     87      1
 SMALL
 NO_CHARGES
 ****
 ****
@<TRIPOS>ATOM
     1  N     0.0260     1.3745     0.1672  N.pl3 1 RES1    0.0000
     2  C    -1.1750     0.7444     0.0965  C.2   1 RES1    0.0000
     3  C    -1.1740    -0.7094    -0.0770  C.2   1 RES1    0.0000
     4  N     0.0204    -1.3411    -0.1513  N.pl3 1 RES1    0.0000
     5  N    -2.2753     1.4285     0.1825  N.2   1 RES1    0.0000
     6  C    -3.4480     0.7455     0.1057  C.2   1 RES1    0.0000
     7  C    -3.4390    -0.7090    -0.0770  C.2   1 RES1    0.0000
     8  N    -2.2794    -1.3961    -0.1605  N.2   1 RES1    0.0000
     9  N    -4.5710     1.4313     0.2018  N.2   1 RES1    0.0000
    10  C    -5.7181     0.7405     0.1234  C.2   1 RES1    0.0000
    11  C    -5.6790    -0.6672    -0.0730  C.2   1 RES1    0.0000
    12  N    -4.5762    -1.3901    -0.1698  N.2   1 RES1    0.0000
    13  N    -6.8904     1.3790     0.2474  N.2   1 RES1    0.0000
    14  C    -8.0420     0.7288     0.1687  C.2   1 RES1    0.0000
    15  C    -8.0737    -0.6744    -0.1319  C.2   1 RES1    0.0000
    16  N    -6.8821    -1.2902    -0.2111  N.pl3 1 RES1    0.0000
    17  C     1.2457    -0.6983    -0.0746  C.2   1 RES1    0.0000
    18  C     1.2475     0.7294     0.0871  C.2   1 RES1    0.0000
    19  N     2.3340    -1.3946    -0.1468  N.2   1 RES1    0.0000
    20  C     3.5097    -0.7114    -0.0653  C.2   1 RES1    0.0000
    21  C     3.5128     0.7294     0.0711  C.2   1 RES1    0.0000
    22  N     2.3409     1.4189     0.1559  N.2   1 RES1    0.0000
    23  N     4.6369    -1.4125    -0.0972  N.2   1 RES1    0.0000
    24  C     5.7679    -0.7179    -0.0215  C.2   1 RES1    0.0000
    25  C     5.7712     0.7239     0.0215  C.2   1 RES1    0.0000
    26  N     4.6437     1.4243     0.1000  N.2   1 RES1    0.0000
    27  N     6.9340    -1.3979     0.0795  N.2   1 RES1    0.0000
    28  C     8.0584    -0.7314     0.1159  C.2   1 RES1    0.0000
    29  C     8.0614     0.7265    -0.1208  C.2   1 RES1    0.0000
    30  N     6.9401     1.3981    -0.0821  N.2   1 RES1    0.0000
    31  C    -9.2643     1.5226     0.4211  C.2   1 RES1    0.0000
    32  C    -9.3277     2.8339    -0.0640  C.2   1 RES1    0.0000
    33  C   -10.4358     3.6244     0.1993  C.2   1 RES1    0.0000
    34  C   -11.4804     3.1276     0.9724  C.2   1 RES1    0.0000
    35  C   -11.4134     1.8346     1.4806  C.2   1 RES1    0.0000
    36  C   -10.3173     1.0317     1.2011  C.2   1 RES1    0.0000
    37  H    -8.5025     3.2253    -0.6432  H     1 RES1    0.0000
    38  H   -10.4809     4.6323    -0.1918  H     1 RES1    0.0000
    39  H   -12.3405     3.7491     1.1854  H     1 RES1    0.0000
    40  H   -12.2133     1.4525     2.1011  H     1 RES1    0.0000
    41  H   -10.2731     0.0337     1.6154  H     1 RES1    0.0000
    42  C    -9.2519    -1.5056    -0.4070  C.2   1 RES1    0.0000
    43  C   -10.2595    -1.0537    -1.2694  C.2   1 RES1    0.0000
    44  C   -11.3228    -1.8834    -1.5874  C.2   1 RES1    0.0000
    45  C   -11.4082    -3.1593    -1.0378  C.2   1 RES1    0.0000
    46  C   -10.4182    -3.6122    -0.1723  C.2   1 RES1    0.0000
    47  C    -9.3401    -2.7960     0.1356  C.2   1 RES1    0.0000
    48  H   -10.1993    -0.0654    -1.7027  H     1 RES1    0.0000
    49  H   -12.0879    -1.5332    -2.2674  H     1 RES1    0.0000
    50  H   -12.2468    -3.7982    -1.2814  H     1 RES1    0.0000
    51  H   -10.4886    -4.5977     0.2684  H     1 RES1    0.0000
    52  H    -8.5913    -3.1477     0.8359  H     1 RES1    0.0000
    53  C     9.2684    -1.5066     0.4541  C.2   1 RES1    0.0000
    54  C     9.3673    -2.8388     0.0312  C.2   1 RES1    0.0000
    55  C    10.4644    -3.6074     0.3854  C.2   1 RES1    0.0000
    56  C    11.4630    -3.0701     1.1930  C.2   1 RES1    0.0000
    57  C    11.3609    -1.7573     1.6406  C.2   1 RES1    0.0000
    58  C    10.2785    -0.9750     1.2658  C.2   1 RES1    0.0000
    59  H     8.5759    -3.2566    -0.5753  H     1 RES1    0.0000
    60  H    10.5390    -4.6298     0.0381  H     1 RES1    0.0000
    61  H    12.3153    -3.6743     1.4764  H     1 RES1    0.0000
    62  H    12.1259    -1.3409     2.2829  H     1 RES1    0.0000
    63  H    10.2101     0.0426     1.6240  H     1 RES1    0.0000
    64  C     9.2739     1.4963    -0.4617  C.2   1 RES1    0.0000
    65  C    10.2816     0.9595    -1.2731  C.2   1 RES1    0.0000
    66  C    11.3663     1.7374    -1.6505  C.2   1 RES1    0.0000
    67  C    11.4732     3.0507    -1.2056  C.2   1 RES1    0.0000
    68  C    10.4771     3.5932    -0.3984  C.2   1 RES1    0.0000
    69  C     9.3777     2.8292    -0.0417  C.2   1 RES1    0.0000
    70  H    10.2094    -0.0585    -1.6294  H     1 RES1    0.0000
    71  H    12.1293     1.3171    -2.2926  H     1 RES1    0.0000
    72  H    12.3273     3.6515    -1.4910  H     1 RES1    0.0000
    73  H    10.5554     4.6161    -0.0533  H     1 RES1    0.0000
    74  H     8.5882     3.2509     0.5645  H     1 RES1    0.0000
    75  H     0.0312     2.3826     0.2840  H     1 RES1    0.0000
    76  H     0.0251    -2.3495    -0.2677  H     1 RES1    0.0000
    77  H    -6.8497    -2.2787    -0.4469  H     1 RES1    0.0000
@<TRIPOS>BOND
     1      1      2      1
     2      1     18      1
     3      1     75      1
     4      2      3      1
     5      2      5      1
     6      3      4      1
     7      3      8      1
     8      4     17      1
     9      4     76      1
    10      5      6      1
    11      6      7      1
    12      6      9      1
    13      7      8      1
    14      7     12      1
    15      9     10      1
    16     10     11      1
    17     10     13      1
    18     11     12      1
    19     11     16      1
    20     13     14      1
    21     14     15      1
    22     14     31      1
    23     15     16      1
    24     15     42      1
    25     16     77      1
    26     17     18      1
    27     17     19      1
    28     18     22      1
    29     19     20      1
    30     20     21      1
    31     20     23      1
    32     21     22      1
    33     21     26      1
    34     23     24      1
    35     24     25      1
    36     24     27      1
    37     25     26      1
    38     25     30      1
    39     27     28      1
    40     28     29      1
    41     28     53      1
    42     29     30      1
    43     29     64      1
    44     31     32      1
    45     31     36      1
    46     32     33      1
    47     32     37      1
    48     33     34      1
    49     33     38      1
    50     34     35      1
    51     34     39      1
    52     35     36      1
    53     35     40      1
    54     36     41      1
    55     42     43      1
    56     42     47      1
    57     43     44      1
    58     43     48      1
    59     44     45      1
    60     44     49      1
    61     45     46      1
    62     45     50      1
    63     46     47      1
    64     46     51      1
    65     47     52      1
    66     53     54      1
    67     53     58      1
    68     54     55      1
    69     54     59      1
    70     55     56      1
    71     55     60      1
    72     56     57      1
    73     56     61      1
    74     57     58      1
    75     57     62      1
    76     58     63      1
    77     64     65      1
    78     64     69      1
    79     65     66      1
    80     65     70      1
    81     66     67      1
    82     66     71      1
    83     67     68      1
    84     67     72      1
    85     68     69      1
    86     68     73      1
    87     69     74      1
@<TRIPOS>SUBSTRUCTURE
      1 RES1       1

N14Ph4H2_B3LYP_Def2_TZVP_H_+1_Is6.mol
@<TRIPOS>MOLECULE
 T2-H0 ground state (Ph4H3N14HEPT,+1)
    77     87      1
 SMALL
 NO_CHARGES
 ****
 ****
@<TRIPOS>ATOM
     1  N    -0.0601     1.4180    -0.2014  N.2   1 RES1    0.0000
     2  C    -1.2341     0.7484    -0.0973  C.2   1 RES1    0.0000
     3  C    -1.2697    -0.6796     0.1067  C.2   1 RES1    0.0000
     4  N    -0.0580    -1.3265     0.2044  N.pl3 1 RES1    0.0000
     5  N    -2.3687     1.4235    -0.1785  N.2   1 RES1    0.0000
     6  C    -3.5116     0.7344    -0.0734  C.2   1 RES1    0.0000
     7  C    -3.5178    -0.7160     0.0945  C.2   1 RES1    0.0000
     8  N    -2.3563    -1.3938     0.1978  N.2   1 RES1    0.0000
     9  N    -4.6610     1.4283    -0.1025  N.2   1 RES1    0.0000
    10  C    -5.7756     0.7313    -0.0116  C.2   1 RES1    0.0000
    11  C    -5.7744    -0.7234     0.0315  C.2   1 RES1    0.0000
    12  N    -4.6519    -1.4174     0.1272  N.2   1 RES1    0.0000
    13  N    -6.9494     1.4003     0.1197  N.2   1 RES1    0.0000
    14  C    -8.0662     0.7282     0.1563  C.2   1 RES1    0.0000
    15  C    -8.0618    -0.7277    -0.1457  C.2   1 RES1    0.0000
    16  N    -6.9404    -1.3968    -0.1010  N.2   1 RES1    0.0000
    17  C     1.1114    -0.6827     0.1085  C.2   1 RES1    0.0000
    18  C     1.0662     0.7572    -0.1068  C.2   1 RES1    0.0000
    19  N     2.2391    -1.3830     0.2120  N.2   1 RES1    0.0000
    20  C     3.3594    -0.6960     0.1073  C.2   1 RES1    0.0000
    21  C     3.3484     0.7493    -0.1107  C.2   1 RES1    0.0000
    22  N     2.2481     1.4283    -0.2106  N.2   1 RES1    0.0000
    23  N     4.5424    -1.3256     0.2025  N.pl3 1 RES1    0.0000
    24  C     5.7625    -0.6685     0.1105  C.2   1 RES1    0.0000
    25  C     5.7638     0.7110    -0.1213  C.2   1 RES1    0.0000
    26  N     4.5563     1.3748    -0.2092  N.pl3 1 RES1    0.0000
    27  N     6.8774    -1.3416     0.2738  N.2   1 RES1    0.0000
    28  C     8.0427    -0.6898     0.1803  C.2   1 RES1    0.0000
    29  C     8.0486     0.6969    -0.1863  C.2   1 RES1    0.0000
    30  N     6.8919     1.3658    -0.2817  N.2   1 RES1    0.0000
    31  C    -9.2725     1.4691     0.5598  C.2   1 RES1    0.0000
    32  C    -9.3708     2.8344     0.2526  C.2   1 RES1    0.0000
    33  C   -10.4651     3.5696     0.6753  C.2   1 RES1    0.0000
    34  C   -11.4611     2.9651     1.4389  C.2   1 RES1    0.0000
    35  C   -11.3598     1.6187     1.7733  C.2   1 RES1    0.0000
    36  C   -10.2812     0.8699     1.3279  C.2   1 RES1    0.0000
    37  H    -8.5814     3.3006    -0.3201  H     1 RES1    0.0000
    38  H   -10.5409     4.6177     0.4169  H     1 RES1    0.0000
    39  H   -12.3111     3.5439     1.7766  H     1 RES1    0.0000
    40  H   -12.1224     1.1510     2.3821  H     1 RES1    0.0000
    41  H   -10.2118    -0.1737     1.6006  H     1 RES1    0.0000
    42  C    -9.2576    -1.4734    -0.5646  C.2   1 RES1    0.0000
    43  C   -10.2695    -0.8741    -1.3296  C.2   1 RES1    0.0000
    44  C   -11.3386    -1.6273    -1.7889  C.2   1 RES1    0.0000
    45  C   -11.4288    -2.9787    -1.4713  C.2   1 RES1    0.0000
    46  C   -10.4305    -3.5838    -0.7109  C.2   1 RES1    0.0000
    47  C    -9.3447    -2.8442    -0.2753  C.2   1 RES1    0.0000
    48  H   -10.2087     0.1732    -1.5893  H     1 RES1    0.0000
    49  H   -12.1028    -1.1594    -2.3952  H     1 RES1    0.0000
    50  H   -12.2723    -3.5610    -1.8194  H     1 RES1    0.0000
    51  H   -10.4985    -4.6354    -0.4650  H     1 RES1    0.0000
    52  H    -8.5540    -3.3097     0.2959  H     1 RES1    0.0000
    53  C     9.2454    -1.4806     0.5153  C.2   1 RES1    0.0000
    54  C     9.3389    -2.8096     0.0870  C.2   1 RES1    0.0000
    55  C    10.4365    -3.5840     0.4320  C.2   1 RES1    0.0000
    56  C    11.4427    -3.0515     1.2315  C.2   1 RES1    0.0000
    57  C    11.3472    -1.7387     1.6812  C.2   1 RES1    0.0000
    58  C    10.2620    -0.9539     1.3201  C.2   1 RES1    0.0000
    59  H     8.5501    -3.2278    -0.5235  H     1 RES1    0.0000
    60  H    10.5055    -4.6052     0.0805  H     1 RES1    0.0000
    61  H    12.2955    -3.6583     1.5067  H     1 RES1    0.0000
    62  H    12.1191    -1.3248     2.3167  H     1 RES1    0.0000
    63  H    10.1978     0.0640     1.6794  H     1 RES1    0.0000
    64  C     9.2593     1.4736    -0.5198  C.2   1 RES1    0.0000
    65  C    10.2876     0.9265    -1.2965  C.2   1 RES1    0.0000
    66  C    11.3799     1.7006    -1.6580  C.2   1 RES1    0.0000
    67  C    11.4723     3.0225    -1.2347  C.2   1 RES1    0.0000
    68  C    10.4553     3.5754    -0.4628  C.2   1 RES1    0.0000
    69  C     9.3497     2.8124    -0.1198  C.2   1 RES1    0.0000
    70  H    10.2260    -0.0982    -1.6358  H     1 RES1    0.0000
    71  H    12.1600     1.2714    -2.2730  H     1 RES1    0.0000
    72  H    12.3312     3.6209    -1.5096  H     1 RES1    0.0000
    73  H    10.5219     4.6039    -0.1328  H     1 RES1    0.0000
    74  H     8.5514     3.2463     0.4668  H     1 RES1    0.0000
    75  H     4.5628     2.3747    -0.3795  H     1 RES1    0.0000
    76  H     4.5512    -2.3269     0.3712  H     1 RES1    0.0000
    77  H    -0.0664    -2.3325     0.3497  H     1 RES1    0.0000
@<TRIPOS>BOND
     1      1      2      1
     2      1     18      1
     3      2      3      1
     4      2      5      1
     5      3      4      1
     6      3      8      1
     7      4     17      1
     8      4     77      1
     9      5      6      1
    10      6      7      1
    11      6      9      1
    12      7      8      1
    13      7     12      1
    14      9     10      1
    15     10     11      1
    16     10     13      1
    17     11     12      1
    18     11     16      1
    19     13     14      1
    20     14     15      1
    21     14     31      1
    22     15     16      1
    23     15     42      1
    24     17     18      1
    25     17     19      1
    26     18     22      1
    27     19     20      1
    28     20     21      1
    29     20     23      1
    30     21     22      1
    31     21     26      1
    32     23     24      1
    33     23     76      1
    34     24     25      1
    35     24     27      1
    36     25     26      1
    37     25     30      1
    38     26     75      1
    39     27     28      1
    40     28     29      1
    41     28     53      1
    42     29     30      1
    43     29     64      1
    44     31     32      1
    45     31     36      1
    46     32     33      1
    47     32     37      1
    48     33     34      1
    49     33     38      1
    50     34     35      1
    51     34     39      1
    52     35     36      1
    53     35     40      1
    54     36     41      1
    55     42     43      1
    56     42     47      1
    57     43     44      1
    58     43     48      1
    59     44     45      1
    60     44     49      1
    61     45     46      1
    62     45     50      1
    63     46     47      1
    64     46     51      1
    65     47     52      1
    66     53     54      1
    67     53     58      1
    68     54     55      1
    69     54     59      1
    70     55     56      1
    71     55     60      1
    72     56     57      1
    73     56     61      1
    74     57     58      1
    75     57     62      1
    76     58     63      1
    77     64     65      1
    78     64     69      1
    79     65     66      1
    80     65     70      1
    81     66     67      1
    82     66     71      1
    83     67     68      1
    84     67     72      1
    85     68     69      1
    86     68     73      1
    87     69     74      1
@<TRIPOS>SUBSTRUCTURE
      1 RES1       1

N14Ph4H2_B3LYP_Def2_TZVP_H_+1_Is7.mol
@<TRIPOS>MOLECULE
 T1-H2 ground state (Ph4H3N14HEPT,+1)
    77     87      1
 SMALL
 NO_CHARGES
 ****
 ****
@<TRIPOS>ATOM
     1  N     0.0098     1.4409    -0.0016  N.2   1 RES1    0.0000
     2  C     1.1833     0.7518    -0.0112  C.2   1 RES1    0.0000
     3  C     1.1712    -0.7169    -0.0186  C.2   1 RES1    0.0000
     4  N     0.0134    -1.4063    -0.0218  N.2   1 RES1    0.0000
     5  N     2.3040     1.4377    -0.0152  N.2   1 RES1    0.0000
     6  C     3.4616     0.7510    -0.0245  C.2   1 RES1    0.0000
     7  C     3.4190    -0.6941    -0.0203  C.2   1 RES1    0.0000
     8  N     2.3068    -1.4073    -0.0208  N.2   1 RES1    0.0000
     9  N     4.6119     1.4221    -0.0460  N.2   1 RES1    0.0000
    10  C     5.7538     0.7343    -0.0543  C.2   1 RES1    0.0000
    11  C     5.7890    -0.6917     0.0068  C.2   1 RES1    0.0000
    12  N     4.6047    -1.3498    -0.0033  N.pl3 1 RES1    0.0000
    13  N     6.9248     1.3907    -0.1761  N.2   1 RES1    0.0000
    14  C     8.0545     0.7216    -0.1598  C.2   1 RES1    0.0000
    15  C     8.0568    -0.7172     0.1371  C.2   1 RES1    0.0000
    16  N     6.9117    -1.3846     0.1313  N.2   1 RES1    0.0000
    17  C    -1.0924    -0.7106    -0.0153  C.2   1 RES1    0.0000
    18  C    -1.0897     0.7524    -0.0033  C.2   1 RES1    0.0000
    19  N    -2.2855    -1.3453    -0.0201  N.pl3 1 RES1    0.0000
    20  C    -3.5087    -0.6961    -0.0163  C.2   1 RES1    0.0000
    21  C    -3.5107     0.7322     0.0083  C.2   1 RES1    0.0000
    22  N    -2.2931     1.3853     0.0069  N.pl3 1 RES1    0.0000
    23  N    -4.6040    -1.3995    -0.0453  N.2   1 RES1    0.0000
    24  C    -5.7635    -0.7045    -0.0425  C.2   1 RES1    0.0000
    25  C    -5.7673     0.7213     0.0427  C.2   1 RES1    0.0000
    26  N    -4.6130     1.4256     0.0411  N.2   1 RES1    0.0000
    27  N    -6.9142    -1.3792    -0.1752  N.2   1 RES1    0.0000
    28  C    -8.0503    -0.7139    -0.1528  C.2   1 RES1    0.0000
    29  C    -8.0542     0.7142     0.1593  C.2   1 RES1    0.0000
    30  N    -6.9221     1.3873     0.1785  N.2   1 RES1    0.0000
    31  C     9.2698     1.4867    -0.4997  C.2   1 RES1    0.0000
    32  C     9.3649     2.8270    -0.1028  C.2   1 RES1    0.0000
    33  C    10.4659     3.5871    -0.4631  C.2   1 RES1    0.0000
    34  C    11.4706     3.0323    -1.2510  C.2   1 RES1    0.0000
    35  C    11.3715     1.7108    -1.6738  C.2   1 RES1    0.0000
    36  C    10.2855     0.9372    -1.2930  C.2   1 RES1    0.0000
    37  H     8.5698     3.2597     0.4882  H     1 RES1    0.0000
    38  H    10.5381     4.6162    -0.1366  H     1 RES1    0.0000
    39  H    12.3252     3.6303    -1.5399  H     1 RES1    0.0000
    40  H    12.1405     1.2824    -2.3031  H     1 RES1    0.0000
    41  H    10.2178    -0.0861    -1.6354  H     1 RES1    0.0000
    42  C     9.2499    -1.4862     0.5065  C.2   1 RES1    0.0000
    43  C    10.2766    -0.9213     1.2792  C.2   1 RES1    0.0000
    44  C    11.3490    -1.6962     1.6903  C.2   1 RES1    0.0000
    45  C    11.4303    -3.0339     1.3158  C.2   1 RES1    0.0000
    46  C    10.4193    -3.6045     0.5462  C.2   1 RES1    0.0000
    47  C     9.3289    -2.8445     0.1600  C.2   1 RES1    0.0000
    48  H    10.2232     0.1145     1.5815  H     1 RES1    0.0000
    49  H    12.1238    -1.2557     2.3036  H     1 RES1    0.0000
    50  H    12.2774    -3.6319     1.6261  H     1 RES1    0.0000
    51  H    10.4816    -4.6443     0.2535  H     1 RES1    0.0000
    52  H     8.5350    -3.2875    -0.4246  H     1 RES1    0.0000
    53  C    -9.2599    -1.4855    -0.5045  C.2   1 RES1    0.0000
    54  C    -9.3560    -2.8264    -0.1115  C.2   1 RES1    0.0000
    55  C   -10.4549    -3.5881    -0.4768  C.2   1 RES1    0.0000
    56  C   -11.4585    -3.0333    -1.2655  C.2   1 RES1    0.0000
    57  C   -11.3593    -1.7104    -1.6835  C.2   1 RES1    0.0000
    58  C   -10.2746    -0.9366    -1.2982  C.2   1 RES1    0.0000
    59  H    -8.5626    -3.2588     0.4823  H     1 RES1    0.0000
    60  H   -10.5268    -4.6180    -0.1521  H     1 RES1    0.0000
    61  H   -12.3122    -3.6313    -1.5575  H     1 RES1    0.0000
    62  H   -12.1283    -1.2798    -2.3114  H     1 RES1    0.0000
    63  H   -10.2083     0.0892    -1.6333  H     1 RES1    0.0000
    64  C    -9.2667     1.4782     0.5155  C.2   1 RES1    0.0000
    65  C   -10.2802     0.9207     1.3052  C.2   1 RES1    0.0000
    66  C   -11.3675     1.6885     1.6948  C.2   1 RES1    0.0000
    67  C   -11.4710     3.0136     1.2850  C.2   1 RES1    0.0000
    68  C   -10.4688     3.5769     0.5003  C.2   1 RES1    0.0000
    69  C    -9.3672     2.8215     0.1311  C.2   1 RES1    0.0000
    70  H   -10.2105    -0.1067     1.6341  H     1 RES1    0.0000
    71  H   -12.1353     1.2514     2.3198  H     1 RES1    0.0000
    72  H   -12.3268     3.6069     1.5804  H     1 RES1    0.0000
    73  H   -10.5441     4.6086     0.1822  H     1 RES1    0.0000
    74  H    -8.5748     3.2604    -0.4591  H     1 RES1    0.0000
    75  H    -2.2981     2.4000     0.0228  H     1 RES1    0.0000
    76  H    -2.2893    -2.3605    -0.0360  H     1 RES1    0.0000
    77  H     4.6000    -2.3658     0.0359  H     1 RES1    0.0000
@<TRIPOS>BOND
     1      1      2      1
     2      1     18      1
     3      2      3      1
     4      2      5      1
     5      3      4      1
     6      3      8      1
     7      4     17      1
     8      5      6      1
     9      6      7      1
    10      6      9      1
    11      7      8      1
    12      7     12      1
    13      9     10      1
    14     10     11      1
    15     10     13      1
    16     11     12      1
    17     11     16      1
    18     12     77      1
    19     13     14      1
    20     14     15      1
    21     14     31      1
    22     15     16      1
    23     15     42      1
    24     17     18      1
    25     17     19      1
    26     18     22      1
    27     19     20      1
    28     19     76      1
    29     20     21      1
    30     20     23      1
    31     21     22      1
    32     21     26      1
    33     22     75      1
    34     23     24      1
    35     24     25      1
    36     24     27      1
    37     25     26      1
    38     25     30      1
    39     27     28      1
    40     28     29      1
    41     28     53      1
    42     29     30      1
    43     29     64      1
    44     31     32      1
    45     31     36      1
    46     32     33      1
    47     32     37      1
    48     33     34      1
    49     33     38      1
    50     34     35      1
    51     34     39      1
    52     35     36      1
    53     35     40      1
    54     36     41      1
    55     42     43      1
    56     42     47      1
    57     43     44      1
    58     43     48      1
    59     44     45      1
    60     44     49      1
    61     45     46      1
    62     45     50      1
    63     46     47      1
    64     46     51      1
    65     47     52      1
    66     53     54      1
    67     53     58      1
    68     54     55      1
    69     54     59      1
    70     55     56      1
    71     55     60      1
    72     56     57      1
    73     56     61      1
    74     57     58      1
    75     57     62      1
    76     58     63      1
    77     64     65      1
    78     64     69      1
    79     65     66      1
    80     65     70      1
    81     66     67      1
    82     66     71      1
    83     67     68      1
    84     67     72      1
    85     68     69      1
    86     68     73      1
    87     69     74      1
@<TRIPOS>SUBSTRUCTURE
      1 RES1       1

N14Ph4H2_B3LYP_Def2_TZVP_H_+1_Is7_TDDFT_Root1.mol
@<TRIPOS>MOLECULE
 T1-H2 excited state 1 (Ph4H3N14HEPT,+1)
    77     87      1
 SMALL
 NO_CHARGES
 ****
 ****
@<TRIPOS>ATOM
     1  C     9.4456    -2.7629    -0.0460  C.2   1 RES1    0.0000
     2  C     9.2827    -1.4723     0.4641  C.2   1 RES1    0.0000
     3  C    10.2743    -0.9420     1.3164  C.2   1 RES1    0.0000
     4  C    11.4112    -1.6762     1.6190  C.2   1 RES1    0.0000
     5  C    11.5736    -2.9487     1.0871  C.2   1 RES1    0.0000
     6  C    10.5842    -3.4912     0.2550  C.2   1 RES1    0.0000
     7  C     8.0497    -0.7030     0.1607  C.2   1 RES1    0.0000
     8  C     8.0505     0.6898    -0.1404  C.2   1 RES1    0.0000
     9  N     6.9137     1.3686    -0.2047  N.2   1 RES1    0.0000
    10  C     5.7687     0.6975    -0.0761  C.2   1 RES1    0.0000
    11  C     5.7672    -0.7080     0.0881  C.2   1 RES1    0.0000
    12  N     6.9126    -1.3792     0.2247  N.2   1 RES1    0.0000
    13  N     4.5938    -1.4121     0.1341  N.2   1 RES1    0.0000
    14  C     3.5017    -0.7268     0.0594  C.2   1 RES1    0.0000
    15  C     3.5037     0.7205    -0.0569  C.2   1 RES1    0.0000
    16  N     4.5946     1.4049    -0.1272  N.2   1 RES1    0.0000
    17  N     2.2826    -1.3745     0.0924  N.pl3 1 RES1    0.0000
    18  C     1.0718    -0.7262     0.0424  C.2   1 RES1    0.0000
    19  C     1.0741     0.7284    -0.0572  C.2   1 RES1    0.0000
    20  N     2.2837     1.3742    -0.0955  N.pl3 1 RES1    0.0000
    21  N    -0.0225    -1.4102     0.0840  N.2   1 RES1    0.0000
    22  C    -1.2024    -0.7172     0.0298  C.2   1 RES1    0.0000
    23  C    -1.1925     0.7223    -0.0658  C.2   1 RES1    0.0000
    24  N    -0.0227     1.4158    -0.1087  N.2   1 RES1    0.0000
    25  N    -2.3319     1.4134    -0.1117  N.2   1 RES1    0.0000
    26  C    -3.4398     0.7035    -0.0700  C.2   1 RES1    0.0000
    27  C    -3.4797    -0.7339     0.0123  C.2   1 RES1    0.0000
    28  N    -2.3266    -1.4126     0.0655  N.2   1 RES1    0.0000
    29  N    -4.6368     1.3643    -0.0932  N.pl3 1 RES1    0.0000
    30  C    -5.8169     0.7013    -0.0377  C.2   1 RES1    0.0000
    31  C    -5.7742    -0.7358    -0.0244  C.2   1 RES1    0.0000
    32  N    -4.6367    -1.4198     0.0258  N.2   1 RES1    0.0000
    33  N    -6.9402     1.3887     0.0540  N.2   1 RES1    0.0000
    34  C    -8.0885     0.7142     0.0982  C.2   1 RES1    0.0000
    35  C    -8.0796    -0.7282    -0.1282  C.2   1 RES1    0.0000
    36  N    -6.9456    -1.3964    -0.1158  N.2   1 RES1    0.0000
    37  C    -9.2909    -1.5167    -0.4309  C.2   1 RES1    0.0000
    38  C    -9.3785    -2.8375     0.0284  C.2   1 RES1    0.0000
    39  C   -10.4758    -3.6202    -0.2930  C.2   1 RES1    0.0000
    40  C   -11.4865    -3.1090    -1.1029  C.2   1 RES1    0.0000
    41  C   -11.3955    -1.8082    -1.5874  C.2   1 RES1    0.0000
    42  C   -10.3119    -1.0123    -1.2475  C.2   1 RES1    0.0000
    43  C    -9.2787     1.4986     0.4390  C.2   1 RES1    0.0000
    44  C   -10.3116     0.9665     1.2283  C.2   1 RES1    0.0000
    45  C   -11.3850     1.7574     1.6042  C.2   1 RES1    0.0000
    46  C   -11.4615     3.0813     1.1824  C.2   1 RES1    0.0000
    47  C   -10.4439     3.6212     0.3990  C.2   1 RES1    0.0000
    48  C    -9.3542     2.8451     0.0449  C.2   1 RES1    0.0000
    49  C     9.2800     1.4612    -0.4482  C.2   1 RES1    0.0000
    50  C     9.4327     2.7604     0.0468  C.2   1 RES1    0.0000
    51  C    10.5680     3.4907    -0.2564  C.2   1 RES1    0.0000
    52  C    11.5646     2.9437    -1.0784  C.2   1 RES1    0.0000
    53  C    11.4122     1.6637    -1.5970  C.2   1 RES1    0.0000
    54  C    10.2793     0.9267    -1.2910  C.2   1 RES1    0.0000
    55  H    -8.5784    -3.2369     0.6360  H     1 RES1    0.0000
    56  H   -10.5409    -4.6335     0.0813  H     1 RES1    0.0000
    57  H   -12.3383    -3.7249    -1.3611  H     1 RES1    0.0000
    58  H   -12.1684    -1.4139    -2.2341  H     1 RES1    0.0000
    59  H   -10.2490    -0.0064    -1.6389  H     1 RES1    0.0000
    60  H   -10.2603    -0.0567     1.5709  H     1 RES1    0.0000
    61  H   -12.1637     1.3408     2.2293  H     1 RES1    0.0000
    62  H   -12.3083     3.6924     1.4671  H     1 RES1    0.0000
    63  H   -10.5011     4.6505     0.0698  H     1 RES1    0.0000
    64  H    -8.5557     3.2645    -0.5506  H     1 RES1    0.0000
    65  H     8.6537     3.1837     0.6655  H     1 RES1    0.0000
    66  H    10.6880     4.4907     0.1392  H     1 RES1    0.0000
    67  H    12.4434     3.5273    -1.3194  H     1 RES1    0.0000
    68  H    12.1655     1.2481    -2.2528  H     1 RES1    0.0000
    69  H    10.1424    -0.0531    -1.7279  H     1 RES1    0.0000
    70  H    10.1300     0.0319     1.7647  H     1 RES1    0.0000
    71  H    12.1589    -1.2632     2.2829  H     1 RES1    0.0000
    72  H    12.4549    -3.5299     1.3252  H     1 RES1    0.0000
    73  H    10.7104    -4.4864    -0.1509  H     1 RES1    0.0000
    74  H     8.6722    -3.1844    -0.6731  H     1 RES1    0.0000
    75  H     2.2790    -2.3839     0.1704  H     1 RES1    0.0000
    76  H     2.2860     2.3834    -0.1740  H     1 RES1    0.0000
    77  H    -4.6349     2.3792    -0.1075  H     1 RES1    0.0000
@<TRIPOS>BOND
     1      1      2      1
     2      1      6      1
     3      1     74      1
     4      2      3      1
     5      2      7      1
     6      3      4      1
     7      3     70      1
     8      4      5      1
     9      4     71      1
    10      5      6      1
    11      5     72      1
    12      6     73      1
    13      7      8      1
    14      7     12      1
    15      8      9      1
    16      8     49      1
    17      9     10      1
    18     10     11      1
    19     10     16      1
    20     11     12      1
    21     11     13      1
    22     13     14      1
    23     14     15      1
    24     14     17      1
    25     15     16      1
    26     15     20      1
    27     17     18      1
    28     17     75      1
    29     18     19      1
    30     18     21      1
    31     19     20      1
    32     19     24      1
    33     20     76      1
    34     21     22      1
    35     22     23      1
    36     22     28      1
    37     23     24      1
    38     23     25      1
    39     25     26      1
    40     26     27      1
    41     26     29      1
    42     27     28      1
    43     27     32      1
    44     29     30      1
    45     29     77      1
    46     30     31      1
    47     30     33      1
    48     31     32      1
    49     31     36      1
    50     33     34      1
    51     34     35      1
    52     34     43      1
    53     35     36      1
    54     35     37      1
    55     37     38      1
    56     37     42      1
    57     38     39      1
    58     38     55      1
    59     39     40      1
    60     39     56      1
    61     40     41      1
    62     40     57      1
    63     41     42      1
    64     41     58      1
    65     42     59      1
    66     43     44      1
    67     43     48      1
    68     44     45      1
    69     44     60      1
    70     45     46      1
    71     45     61      1
    72     46     47      1
    73     46     62      1
    74     47     48      1
    75     47     63      1
    76     48     64      1
    77     49     50      1
    78     49     54      1
    79     50     51      1
    80     50     65      1
    81     51     52      1
    82     51     66      1
    83     52     53      1
    84     52     67      1
    85     53     54      1
    86     53     68      1
    87     54     69      1
@<TRIPOS>SUBSTRUCTURE
      1 RES1       1

N14Ph4H2_B3LYP_Def2_TZVP_H_+1_Is8.mol
@<TRIPOS>MOLECULE
 T1-H3 ground state (Ph4H3N14HEPT,+1)
    77     87      1
 SMALL
 NO_CHARGES
 ****
 ****
@<TRIPOS>ATOM
     1  N    -0.0009     1.4402     0.0186  N.2   1 RES1    0.0000
     2  C    -1.1759     0.7538    -0.0175  C.2   1 RES1    0.0000
     3  C    -1.1752    -0.7170    -0.1229  C.2   1 RES1    0.0000
     4  N    -0.0068    -1.4053    -0.1730  N.2   1 RES1    0.0000
     5  N    -2.2906     1.4399     0.0481  N.2   1 RES1    0.0000
     6  C    -3.4487     0.7500     0.0152  C.2   1 RES1    0.0000
     7  C    -3.4409    -0.7106    -0.1066  C.2   1 RES1    0.0000
     8  N    -2.2965    -1.4042    -0.1702  N.2   1 RES1    0.0000
     9  N    -4.5816     1.4417     0.1007  N.2   1 RES1    0.0000
    10  C    -5.7193     0.7490     0.0678  C.2   1 RES1    0.0000
    11  C    -5.6821    -0.6702    -0.0757  C.2   1 RES1    0.0000
    12  N    -4.5903    -1.3959    -0.1600  N.2   1 RES1    0.0000
    13  N    -6.8965     1.3903     0.1913  N.2   1 RES1    0.0000
    14  C    -8.0434     0.7379     0.1567  C.2   1 RES1    0.0000
    15  C    -8.0789    -0.6812    -0.1000  C.2   1 RES1    0.0000
    16  N    -6.8928    -1.2983    -0.1755  N.pl3 1 RES1    0.0000
    17  C     1.0940    -0.7148    -0.1261  C.2   1 RES1    0.0000
    18  C     1.0955     0.7491    -0.0315  C.2   1 RES1    0.0000
    19  N     2.2915    -1.3478    -0.1618  N.pl3 1 RES1    0.0000
    20  C     3.5128    -0.7018    -0.1051  C.2   1 RES1    0.0000
    21  C     3.5158     0.7253    -0.0294  C.2   1 RES1    0.0000
    22  N     2.2985     1.3778     0.0050  N.pl3 1 RES1    0.0000
    23  N     4.6096    -1.4045    -0.1090  N.2   1 RES1    0.0000
    24  C     5.7679    -0.7105    -0.0442  C.2   1 RES1    0.0000
    25  C     5.7721     0.7174    -0.0295  C.2   1 RES1    0.0000
    26  N     4.6175     1.4198     0.0021  N.2   1 RES1    0.0000
    27  N     6.9171    -1.3927     0.0623  N.2   1 RES1    0.0000
    28  C     8.0524    -0.7273     0.1094  C.2   1 RES1    0.0000
    29  C     8.0609     0.7188    -0.0995  C.2   1 RES1    0.0000
    30  N     6.9288     1.3916    -0.0958  N.2   1 RES1    0.0000
    31  C    -9.2642     1.5334     0.4109  C.2   1 RES1    0.0000
    32  C    -9.3419     2.8310    -0.1082  C.2   1 RES1    0.0000
    33  C   -10.4455     3.6262     0.1590  C.2   1 RES1    0.0000
    34  C   -11.4709     3.1488     0.9695  C.2   1 RES1    0.0000
    35  C   -11.3892     1.8704     1.5111  C.2   1 RES1    0.0000
    36  C   -10.2980     1.0619     1.2282  C.2   1 RES1    0.0000
    37  H    -8.5307     3.2077    -0.7160  H     1 RES1    0.0000
    38  H   -10.5020     4.6231    -0.2580  H     1 RES1    0.0000
    39  H   -12.3272     3.7744     1.1855  H     1 RES1    0.0000
    40  H   -12.1734     1.5041     2.1606  H     1 RES1    0.0000
    41  H   -10.2418     0.0761     1.6692  H     1 RES1    0.0000
    42  C    -9.2628    -1.5149    -0.3318  C.2   1 RES1    0.0000
    43  C   -10.2896    -1.0782    -1.1802  C.2   1 RES1    0.0000
    44  C   -11.3589    -1.9135    -1.4602  C.2   1 RES1    0.0000
    45  C   -11.4325    -3.1785    -0.8844  C.2   1 RES1    0.0000
    46  C   -10.4242    -3.6158    -0.0316  C.2   1 RES1    0.0000
    47  C    -9.3393    -2.7955     0.2366  C.2   1 RES1    0.0000
    48  H   -10.2385    -0.0986    -1.6337  H     1 RES1    0.0000
    49  H   -12.1382    -1.5762    -2.1304  H     1 RES1    0.0000
    50  H   -12.2764    -3.8214    -1.0975  H     1 RES1    0.0000
    51  H   -10.4858    -4.5925     0.4294  H     1 RES1    0.0000
    52  H    -8.5755    -3.1346     0.9268  H     1 RES1    0.0000
    53  C     9.2559    -1.5228     0.4297  C.2   1 RES1    0.0000
    54  C     9.3614    -2.8319    -0.0564  C.2   1 RES1    0.0000
    55  C    10.4528    -3.6188     0.2765  C.2   1 RES1    0.0000
    56  C    11.4393    -3.1230     1.1239  C.2   1 RES1    0.0000
    57  C    11.3302    -1.8334     1.6333  C.2   1 RES1    0.0000
    58  C    10.2531    -1.0332     1.2819  C.2   1 RES1    0.0000
    59  H     8.5807    -3.2201    -0.6958  H     1 RES1    0.0000
    60  H    10.5320    -4.6230    -0.1195  H     1 RES1    0.0000
    61  H    12.2869    -3.7412     1.3903  H     1 RES1    0.0000
    62  H    12.0855    -1.4494     2.3066  H     1 RES1    0.0000
    63  H    10.1791    -0.0340     1.6882  H     1 RES1    0.0000
    64  C     9.2807     1.5071    -0.3706  C.2   1 RES1    0.0000
    65  C    10.3106     1.0112    -1.1793  C.2   1 RES1    0.0000
    66  C    11.4064     1.8049    -1.4843  C.2   1 RES1    0.0000
    67  C    11.5013     3.0939    -0.9705  C.2   1 RES1    0.0000
    68  C    10.4824     3.5961    -0.1663  C.2   1 RES1    0.0000
    69  C     9.3730     2.8159     0.1194  C.2   1 RES1    0.0000
    70  H    10.2481     0.0124    -1.5882  H     1 RES1    0.0000
    71  H    12.1877     1.4163    -2.1244  H     1 RES1    0.0000
    72  H    12.3634     3.7069    -1.2002  H     1 RES1    0.0000
    73  H    10.5506     4.5999     0.2326  H     1 RES1    0.0000
    74  H     8.5680     3.2088     0.7248  H     1 RES1    0.0000
    75  H     2.3043     2.3910     0.0642  H     1 RES1    0.0000
    76  H     2.2937    -2.3615    -0.2165  H     1 RES1    0.0000
    77  H    -6.8601    -2.2935    -0.3819  H     1 RES1    0.0000
@<TRIPOS>BOND
     1      1      2      1
     2      1     18      1
     3      2      3      1
     4      2      5      1
     5      3      4      1
     6      3      8      1
     7      4     17      1
     8      5      6      1
     9      6      7      1
    10      6      9      1
    11      7      8      1
    12      7     12      1
    13      9     10      1
    14     10     11      1
    15     10     13      1
    16     11     12      1
    17     11     16      1
    18     13     14      1
    19     14     15      1
    20     14     31      1
    21     15     16      1
    22     15     42      1
    23     16     77      1
    24     17     18      1
    25     17     19      1
    26     18     22      1
    27     19     20      1
    28     19     76      1
    29     20     21      1
    30     20     23      1
    31     21     22      1
    32     21     26      1
    33     22     75      1
    34     23     24      1
    35     24     25      1
    36     24     27      1
    37     25     26      1
    38     25     30      1
    39     27     28      1
    40     28     29      1
    41     28     53      1
    42     29     30      1
    43     29     64      1
    44     31     32      1
    45     31     36      1
    46     32     33      1
    47     32     37      1
    48     33     34      1
    49     33     38      1
    50     34     35      1
    51     34     39      1
    52     35     36      1
    53     35     40      1
    54     36     41      1
    55     42     43      1
    56     42     47      1
    57     43     44      1
    58     43     48      1
    59     44     45      1
    60     44     49      1
    61     45     46      1
    62     45     50      1
    63     46     47      1
    64     46     51      1
    65     47     52      1
    66     53     54      1
    67     53     58      1
    68     54     55      1
    69     54     59      1
    70     55     56      1
    71     55     60      1
    72     56     57      1
    73     56     61      1
    74     57     58      1
    75     57     62      1
    76     58     63      1
    77     64     65      1
    78     64     69      1
    79     65     66      1
    80     65     70      1
    81     66     67      1
    82     66     71      1
    83     67     68      1
    84     67     72      1
    85     68     69      1
    86     68     73      1
    87     69     74      1
@<TRIPOS>SUBSTRUCTURE
      1 RES1       1

N14Ph4H2_B3LYP_Def2_TZVP_H_+1_Is9.mol
@<TRIPOS>MOLECULE
 T1-H0 ground state (Ph4H3N14HEPT,+1)
    77     87      1
 SMALL
 NO_CHARGES
 ****
 ****
@<TRIPOS>ATOM
     1  N     0.0350     1.3943     0.0944  N.2   1 RES1    0.0000
     2  C     1.2333     0.7357     0.0433  C.2   1 RES1    0.0000
     3  C     1.2752    -0.6947    -0.0511  C.2   1 RES1    0.0000
     4  N     0.0515    -1.3678    -0.0998  N.pl3 1 RES1    0.0000
     5  N     2.3536     1.4186     0.0761  N.2   1 RES1    0.0000
     6  C     3.5092     0.7260     0.0237  C.2   1 RES1    0.0000
     7  C     3.5213    -0.7266    -0.0387  C.2   1 RES1    0.0000
     8  N     2.3531    -1.4129    -0.0896  N.2   1 RES1    0.0000
     9  N     4.6504     1.4235     0.0083  N.2   1 RES1    0.0000
    10  C     5.7720     0.7249    -0.0333  C.2   1 RES1    0.0000
    11  C     5.7765    -0.7251     0.0188  C.2   1 RES1    0.0000
    12  N     4.6530    -1.4270    -0.0255  N.2   1 RES1    0.0000
    13  N     6.9412     1.3902    -0.2001  N.2   1 RES1    0.0000
    14  C     8.0625     0.7215    -0.1937  C.2   1 RES1    0.0000
    15  C     8.0643    -0.7133     0.1867  C.2   1 RES1    0.0000
    16  N     6.9444    -1.3871     0.1871  N.2   1 RES1    0.0000
    17  C    -1.1155    -0.7306    -0.0543  C.2   1 RES1    0.0000
    18  C    -1.0693     0.7209     0.0496  C.2   1 RES1    0.0000
    19  N    -2.2878    -1.3680    -0.0994  N.pl3 1 RES1    0.0000
    20  C    -3.5201    -0.6954    -0.0531  C.2   1 RES1    0.0000
    21  C    -3.5036     0.7213     0.0603  C.2   1 RES1    0.0000
    22  N    -2.2785     1.3611     0.0993  N.pl3 1 RES1    0.0000
    23  N    -4.6076    -1.3979    -0.1275  N.2   1 RES1    0.0000
    24  C    -5.7694    -0.7032    -0.0827  C.2   1 RES1    0.0000
    25  C    -5.7635     0.7134     0.0913  C.2   1 RES1    0.0000
    26  N    -4.6048     1.4128     0.1344  N.2   1 RES1    0.0000
    27  N    -6.9199    -1.3650    -0.2610  N.2   1 RES1    0.0000
    28  C    -8.0538    -0.6978    -0.2013  C.2   1 RES1    0.0000
    29  C    -8.0510     0.7076     0.2045  C.2   1 RES1    0.0000
    30  N    -6.9152     1.3735     0.2673  N.2   1 RES1    0.0000
    31  C     9.2667     1.4479    -0.6308  C.2   1 RES1    0.0000
    32  C     9.3589     2.8263    -0.3882  C.2   1 RES1    0.0000
    33  C    10.4511     3.5455    -0.8432  C.2   1 RES1    0.0000
    34  C    11.4507     2.9101    -1.5758  C.2   1 RES1    0.0000
    35  C    11.3553     1.5491    -1.8465  C.2   1 RES1    0.0000
    36  C    10.2790     0.8176    -1.3680  C.2   1 RES1    0.0000
    37  H     8.5669     3.3160     0.1607  H     1 RES1    0.0000
    38  H    10.5220     4.6049    -0.6341  H     1 RES1    0.0000
    39  H    12.2991     3.4758    -1.9390  H     1 RES1    0.0000
    40  H    12.1209     1.0562    -2.4311  H     1 RES1    0.0000
    41  H    10.2148    -0.2382    -1.5905  H     1 RES1    0.0000
    42  C     9.2671    -1.4346     0.6331  C.2   1 RES1    0.0000
    43  C    10.2744    -0.7983     1.3726  C.2   1 RES1    0.0000
    44  C    11.3502    -1.5248     1.8594  C.2   1 RES1    0.0000
    45  C    11.4510    -2.8866     1.5946  C.2   1 RES1    0.0000
    46  C    10.4569    -3.5281     0.8596  C.2   1 RES1    0.0000
    47  C     9.3647    -2.8140     0.3968  C.2   1 RES1    0.0000
    48  H    10.2062     0.2581     1.5903  H     1 RES1    0.0000
    49  H    12.1116    -1.0273     2.4456  H     1 RES1    0.0000
    50  H    12.2995    -3.4483     1.9639  H     1 RES1    0.0000
    51  H    10.5326    -4.5879     0.6546  H     1 RES1    0.0000
    52  H     8.5772    -3.3080    -0.1547  H     1 RES1    0.0000
    53  C    -9.2655    -1.4375    -0.6081  C.2   1 RES1    0.0000
    54  C    -9.3739    -2.7995    -0.3009  C.2   1 RES1    0.0000
    55  C   -10.4755    -3.5283    -0.7213  C.2   1 RES1    0.0000
    56  C   -11.4689    -2.9172    -1.4807  C.2   1 RES1    0.0000
    57  C   -11.3572    -1.5714    -1.8136  C.2   1 RES1    0.0000
    58  C   -10.2702    -0.8315    -1.3724  C.2   1 RES1    0.0000
    59  H    -8.5892    -3.2747     0.2713  H     1 RES1    0.0000
    60  H   -10.5577    -4.5758    -0.4622  H     1 RES1    0.0000
    61  H   -12.3246    -3.4890    -1.8157  H     1 RES1    0.0000
    62  H   -12.1185    -1.0962    -2.4183  H     1 RES1    0.0000
    63  H   -10.1946     0.2131    -1.6409  H     1 RES1    0.0000
    64  C    -9.2592     1.4510     0.6110  C.2   1 RES1    0.0000
    65  C   -10.2800     0.8435     1.3533  C.2   1 RES1    0.0000
    66  C   -11.3628     1.5884     1.7955  C.2   1 RES1    0.0000
    67  C   -11.4551     2.9411     1.4844  C.2   1 RES1    0.0000
    68  C   -10.4461     3.5539     0.7470  C.2   1 RES1    0.0000
    69  C    -9.3482     2.8201     0.3270  C.2   1 RES1    0.0000
    70  H   -10.2196    -0.2060     1.6055  H     1 RES1    0.0000
    71  H   -12.1362     1.1122     2.3838  H     1 RES1    0.0000
    72  H   -12.3079     3.5170     1.8199  H     1 RES1    0.0000
    73  H   -10.5131     4.6067     0.5059  H     1 RES1    0.0000
    74  H    -8.5507     3.2959    -0.2265  H     1 RES1    0.0000
    75  H    -2.2701     2.3719     0.1796  H     1 RES1    0.0000
    76  H    -2.3468    -2.3783    -0.1802  H     1 RES1    0.0000
    77  H     0.1119    -2.3797    -0.1676  H     1 RES1    0.0000
@<TRIPOS>BOND
     1      1      2      1
     2      1     18      1
     3      2      3      1
     4      2      5      1
     5      3      4      1
     6      3      8      1
     7      4     17      1
     8      4     77      1
     9      5      6      1
    10      6      7      1
    11      6      9      1
    12      7      8      1
    13      7     12      1
    14      9     10      1
    15     10     11      1
    16     10     13      1
    17     11     12      1
    18     11     16      1
    19     13     14      1
    20     14     15      1
    21     14     31      1
    22     15     16      1
    23     15     42      1
    24     17     18      2
    25     17     19      1
    26     18     22      1
    27     19     20      1
    28     19     76      1
    29     20     21      1
    30     20     23      1
    31     21     22      1
    32     21     26      1
    33     22     75      1
    34     23     24      1
    35     24     25      1
    36     24     27      1
    37     25     26      1
    38     25     30      1
    39     27     28      1
    40     28     29      1
    41     28     53      1
    42     29     30      1
    43     29     64      1
    44     31     32      1
    45     31     36      1
    46     32     33      1
    47     32     37      1
    48     33     34      1
    49     33     38      1
    50     34     35      1
    51     34     39      1
    52     35     36      1
    53     35     40      1
    54     36     41      1
    55     42     43      1
    56     42     47      1
    57     43     44      1
    58     43     48      1
    59     44     45      1
    60     44     49      1
    61     45     46      1
    62     45     50      1
    63     46     47      1
    64     46     51      1
    65     47     52      1
    66     53     54      1
    67     53     58      1
    68     54     55      1
    69     54     59      1
    70     55     56      1
    71     55     60      1
    72     56     57      1
    73     56     61      1
    74     57     58      1
    75     57     62      1
    76     58     63      1
    77     64     65      1
    78     64     69      1
    79     65     66      1
    80     65     70      1
    81     66     67      1
    82     66     71      1
    83     67     68      1
    84     67     72      1
    85     68     69      1
    86     68     73      1
    87     69     74      1
@<TRIPOS>SUBSTRUCTURE
      1 RES1       1

N14Ph4H2_B3LYP_Def2_TZVP.mol
@<TRIPOS>MOLECULE
 T0 ground state (Ph4H2N14HEPT,0)
    76     86      1
 SMALL
 NO_CHARGES
 ****
 ****
@<TRIPOS>ATOM
	1	N	0		1.3685		0		N.2	1	RES1	0
	2	C	1.2151		0.7266		-0.0032		C.2	1	RES1	0
	3	C	1.2151		-0.7266		0.0031		C.2	1	RES1	0
	4	N	0		-1.3685		-0.0001		N.2	1	RES1	0
	5	C	-1.2151		-0.7266		-0.0032		C.2	1	RES1	0
	6	C	-1.2151		0.7266		0.0031		C.2	1	RES1	0
	7	N	2.3074		1.418		-0.0131		N.2	1	RES1	0
	8	C	3.4869		0.7239		-0.0146		C.2	1	RES1	0
	9	C	3.4869		-0.7239		0.0146		C.2	1	RES1	0
	10	N	2.3074		-1.418		0.013		N.2	1	RES1	0
	11	N	4.6108		1.4177		-0.0548		N.2	1	RES1	0
	12	C	5.7482		0.7139		-0.0482		C.2	1	RES1	0
	13	C	5.7482		-0.714		0.0482		C.2	1	RES1	0
	14	N	4.6108		-1.4177		0.0548		N.2	1	RES1	0
	15	N	6.9151		1.3845		-0.1829		N.2	1	RES1	0
	16	C	8.041		0.715		-0.1488		C.2	1	RES1	0
	17	C	8.041		-0.715		0.1487		C.2	1	RES1	0
	18	N	6.9151		-1.3846		0.1829		N.2	1	RES1	0
	19	N	-2.3074		-1.418		-0.0131		N.2	1	RES1	0
	20	C	-3.4869		-0.7239		-0.0146		C.2	1	RES1	0
	21	C	-3.4869		0.7239		0.0146		C.2	1	RES1	0
	22	N	-2.3074		1.418		0.013		N.2	1	RES1	0
	23	N	-4.6108		-1.4177		-0.0548		N.2	1	RES1	0
	24	C	-5.7482		-0.7139		-0.0482		C.2	1	RES1	0
	25	C	-5.7482		0.714		0.0482		C.2	1	RES1	0
	26	N	-4.6108		1.4177		0.0548		N.2	1	RES1	0
	27	N	-6.9151		-1.3845		-0.183		N.2	1	RES1	0
	28	C	-8.041		-0.715		-0.1488		C.2	1	RES1	0
	29	C	-8.041		0.715		0.1487		C.2	1	RES1	0
	30	N	-6.9151		1.3845		0.1829		N.2	1	RES1	0
	31	C	9.2636		1.4908		-0.4734		C.2	1	RES1	0
	32	C	9.3742		2.8116		-0.026		C.2	1	RES1	0
	33	C	10.4802		3.5788		-0.3612		C.2	1	RES1	0
	34	C	11.4802		3.0481		-1.1699		C.2	1	RES1	0
	35	C	11.3675		1.7442		-1.6396		C.2	1	RES1	0
	36	C	10.2723		0.9671		-1.2879		C.2	1	RES1	0
	37	H	8.5807		3.2271		0.5799		H	1	RES1	0
	38	H	10.5585		4.5954		0.0028		H	1	RES1	0
	39	H	12.3397		3.6496		-1.4378		H	1	RES1	0
	40	H	12.1333		1.33		-2.283		H	1	RES1	0
	41	H	10.1959		-0.0445		-1.6624		H	1	RES1	0
	42	C	9.2636		-1.4908		0.4734		C.2	1	RES1	0
	43	C	10.2723		-0.9671		1.2879		C.2	1	RES1	0
	44	C	11.3674		-1.7442		1.6397		C.2	1	RES1	0
	45	C	11.4802		-3.0481		1.17		C.2	1	RES1	0
	46	C	10.4802		-3.5788		0.3613		C.2	1	RES1	0
	47	C	9.3742		-2.8116		0.0261		C.2	1	RES1	0
	48	H	10.1959		0.0445		1.6624		H	1	RES1	0
	49	H	12.1332		-1.3299		2.283		H	1	RES1	0
	50	H	12.3397		-3.6496		1.4379		H	1	RES1	0
	51	H	10.5585		-4.5955		-0.0027		H	1	RES1	0
	52	H	8.5807		-3.2272		-0.5799		H	1	RES1	0
	53	C	-9.2636		-1.4908		-0.4734		C.2	1	RES1	0
	54	C	-9.3742		-2.8116		-0.0261		C.2	1	RES1	0
	55	C	-10.4802	-3.5788		-0.3613		C.2	1	RES1	0
	56	C	-11.4802	-3.048		-1.17		C.2	1	RES1	0
	57	C	-11.3675	-1.7442		-1.6396		C.2	1	RES1	0
	58	C	-10.2723	-0.967		-1.2879		C.2	1	RES1	0
	59	H	-8.5807		-3.2272		0.5798		H	1	RES1	0
	60	H	-10.5585	-4.5954		0.0027		H	1	RES1	0
	61	H	-12.3397	-3.6495		-1.4379		H	1	RES1	0
	62	H	-12.1333	-1.3299		-2.2829		H	1	RES1	0
	63	H	-10.1959	0.0446		-1.6624		H	1	RES1	0
	64	C	-9.2636		1.4908		0.4734		C.2	1	RES1	0
	65	C	-10.2723	0.967		1.2879		C.2	1	RES1	0
	66	C	-11.3675	1.7442		1.6397		C.2	1	RES1	0
	67	C	-11.4802	3.048		1.1701		C.2	1	RES1	0
	68	C	-10.4802	3.5788		0.3614		C.2	1	RES1	0
	69	C	-9.3742		2.8117		0.0261		C.2	1	RES1	0
	70	H	-10.1959	-0.0446		1.6624		H	1	RES1	0
	71	H	-12.1333	1.3299		2.283		H	1	RES1	0
	72	H	-12.3397	3.6495		1.438		H	1	RES1	0
	73	H	-10.5585	4.5955		-0.0025		H	1	RES1	0
	74	H	-8.5807		3.2272		-0.5798		H	1	RES1	0
	75	H	0		2.3815		0		H	1	RES1	0
	76	H	0		-2.3815		-0.0001		H	1	RES1	0
@<TRIPOS>BOND											
	1	1	2	1								
	2	1	6	1								
	3	1	75	1								
	4	2	3	1								
	5	2	7	1								
	6	3	4	1								
	7	3	10	1								
	8	4	5	1								
	9	4	76	1								
	10	5	6	1								
	11	5	19	1								
	12	6	22	1								
	13	7	8	1								
	14	8	9	1								
	15	8	11	1								
	16	9	10	1								
	17	9	14	1								
	18	11	12	1								
	19	12	13	1								
	20	12	15	1								
	21	13	14	1								
	22	13	18	1								
	23	15	16	1								
	24	16	17	1								
	25	16	31	1								
	26	17	18	1								
	27	17	42	1								
	28	19	20	1								
	29	20	21	1								
	30	20	23	1								
	31	21	22	1								
	32	21	26	1								
	33	23	24	1								
	34	24	25	1								
	35	24	27	1								
	36	25	26	1								
	37	25	30	1								
	38	27	28	1								
	39	28	29	1								
	40	28	53	1								
	41	29	30	1								
	42	29	64	1								
	43	31	32	1								
	44	31	36	1								
	45	32	33	1								
	46	32	37	1								
	47	33	34	1								
	48	33	38	1								
	49	34	35	1								
	50	34	39	1								
	51	35	36	1								
	52	35	40	1								
	53	36	41	1								
	54	42	43	1								
	55	42	47	1								
	56	43	44	1								
	57	43	48	1								
	58	44	45	1								
	59	44	49	1								
	60	45	46	1								
	61	45	50	1								
	62	46	47	1								
	63	46	51	1								
	64	47	52	1								
	65	53	54	1								
	66	53	58	1								
	67	54	55	1								
	68	54	59	1								
	69	55	56	1								
	70	55	60	1								
	71	56	57	1								
	72	56	61	1								
	73	57	58	1								
	74	57	62	1								
	75	58	63	1								
	76	64	65	1								
	77	64	69	1								
	78	65	66	1								
	79	65	70	1								
	80	66	67	1								
	81	66	71	1								
	82	67	68	1								
	83	67	72	1								
	84	68	69	1								
	85	68	73	1								
	86	69	74	1																						
@<TRIPOS>SUBSTRUCTURE
      1 RES1       1

N14Ph4H2_B3LYP_Def2_TZVP_tauto1.mol
@<TRIPOS>MOLECULE
 T1 ground state (Ph4H2N14HEPT,0)
    76     86      1
 SMALL
 NO_CHARGES
 ****
 ****
@<TRIPOS>ATOM
     1  N    -0.0324     1.4257    -0.0652  N.2   1 RES1    0.0000
     2  C    -1.2190     0.7308    -0.0286  C.2   1 RES1    0.0000
     3  C    -1.2190    -0.7308     0.0285  C.2   1 RES1    0.0000
     4  N    -0.0325    -1.4257     0.0652  N.2   1 RES1    0.0000
     5  N    -2.3340     1.4252    -0.0434  N.2   1 RES1    0.0000
     6  C    -3.4928     0.7269    -0.0120  C.2   1 RES1    0.0000
     7  C    -3.4928    -0.7268     0.0120  C.2   1 RES1    0.0000
     8  N    -2.3340    -1.4252     0.0433  N.2   1 RES1    0.0000
     9  N    -4.6345     1.4267     0.0122  N.2   1 RES1    0.0000
    10  C    -5.7599     0.7214     0.0295  C.2   1 RES1    0.0000
    11  C    -5.7599    -0.7214    -0.0295  C.2   1 RES1    0.0000
    12  N    -4.6345    -1.4267    -0.0123  N.2   1 RES1    0.0000
    13  N    -6.9363     1.3967     0.1649  N.2   1 RES1    0.0000
    14  C    -8.0574     0.7221     0.1464  C.2   1 RES1    0.0000
    15  C    -8.0574    -0.7221    -0.1464  C.2   1 RES1    0.0000
    16  N    -6.9363    -1.3967    -0.1649  N.2   1 RES1    0.0000
    17  C     1.0587    -0.7315     0.0359  C.2   1 RES1    0.0000
    18  C     1.0587     0.7315    -0.0360  C.2   1 RES1    0.0000
    19  N     2.2759    -1.3688     0.0734  N.pl3 1 RES1    0.0000
    20  C     3.4960    -0.7204     0.0443  C.2   1 RES1    0.0000
    21  C     3.4960     0.7204    -0.0444  C.2   1 RES1    0.0000
    22  N     2.2759     1.3688    -0.0734  N.pl3 1 RES1    0.0000
    23  N     4.5956    -1.4144     0.1031  N.2   1 RES1    0.0000
    24  C     5.7612    -0.7087     0.0681  C.2   1 RES1    0.0000
    25  C     5.7612     0.7087    -0.0681  C.2   1 RES1    0.0000
    26  N     4.5956     1.4144    -0.1032  N.2   1 RES1    0.0000
    27  N     6.9141    -1.3805     0.2067  N.2   1 RES1    0.0000
    28  C     8.0533    -0.7068     0.1537  C.2   1 RES1    0.0000
    29  C     8.0533     0.7068    -0.1538  C.2   1 RES1    0.0000
    30  N     6.9141     1.3805    -0.2068  N.2   1 RES1    0.0000
    31  C    -9.2841     1.4901     0.4803  C.2   1 RES1    0.0000
    32  C    -9.3968     2.8200     0.0485  C.2   1 RES1    0.0000
    33  C   -10.5080     3.5816     0.3932  C.2   1 RES1    0.0000
    34  C   -11.5094     3.0365     1.1974  C.2   1 RES1    0.0000
    35  C   -11.3934     1.7240     1.6530  C.2   1 RES1    0.0000
    36  C   -10.2942     0.9513     1.2900  C.2   1 RES1    0.0000
    37  H    -8.6022     3.2461    -0.5524  H     1 RES1    0.0000
    38  H   -10.5890     4.6049     0.0413  H     1 RES1    0.0000
    39  H   -12.3725     3.6338     1.4730  H     1 RES1    0.0000
    40  H   -12.1598     1.2993     2.2929  H     1 RES1    0.0000
    41  H   -10.2165    -0.0668     1.6531  H     1 RES1    0.0000
    42  C    -9.2842    -1.4901    -0.4803  C.2   1 RES1    0.0000
    43  C   -10.2942    -0.9513    -1.2900  C.2   1 RES1    0.0000
    44  C   -11.3934    -1.7240    -1.6529  C.2   1 RES1    0.0000
    45  C   -11.5094    -3.0365    -1.1973  C.2   1 RES1    0.0000
    46  C   -10.5080    -3.5816    -0.3931  C.2   1 RES1    0.0000
    47  C    -9.3968    -2.8200    -0.0485  C.2   1 RES1    0.0000
    48  H   -10.2166     0.0668    -1.6532  H     1 RES1    0.0000
    49  H   -12.1599    -1.2994    -2.2929  H     1 RES1    0.0000
    50  H   -12.3726    -3.6338    -1.4729  H     1 RES1    0.0000
    51  H   -10.5890    -4.6048    -0.0411  H     1 RES1    0.0000
    52  H    -8.6022    -3.2460     0.5525  H     1 RES1    0.0000
    53  C     9.2767    -1.4916     0.4670  C.2   1 RES1    0.0000
    54  C     9.3854    -2.8095     0.0011  C.2   1 RES1    0.0000
    55  C    10.4969    -3.5827     0.3208  C.2   1 RES1    0.0000
    56  C    11.5044    -3.0602     1.1316  C.2   1 RES1    0.0000
    57  C    11.3930    -1.7590     1.6199  C.2   1 RES1    0.0000
    58  C    10.2918    -0.9766     1.2848  C.2   1 RES1    0.0000
    59  H     8.5886    -3.2203    -0.6079  H     1 RES1    0.0000
    60  H    10.5733    -4.5971    -0.0572  H     1 RES1    0.0000
    61  H    12.3679    -3.6657     1.3871  H     1 RES1    0.0000
    62  H    12.1644    -1.3512     2.2650  H     1 RES1    0.0000
    63  H    10.2171     0.0326     1.6731  H     1 RES1    0.0000
    64  C     9.2767     1.4916    -0.4670  C.2   1 RES1    0.0000
    65  C    10.2918     0.9766    -1.2848  C.2   1 RES1    0.0000
    66  C    11.3931     1.7590    -1.6198  C.2   1 RES1    0.0000
    67  C    11.5044     3.0602    -1.1315  C.2   1 RES1    0.0000
    68  C    10.4969     3.5827    -0.3207  C.2   1 RES1    0.0000
    69  C     9.3854     2.8094    -0.0010  C.2   1 RES1    0.0000
    70  H    10.2172    -0.0326    -1.6731  H     1 RES1    0.0000
    71  H    12.1644     1.3512    -2.2649  H     1 RES1    0.0000
    72  H    12.3679     3.6658    -1.3870  H     1 RES1    0.0000
    73  H    10.5733     4.5970     0.0573  H     1 RES1    0.0000
    74  H     8.5886     3.2202     0.6080  H     1 RES1    0.0000
    75  H     2.2769     2.3813    -0.1324  H     1 RES1    0.0000
    76  H     2.2769    -2.3814     0.1323  H     1 RES1    0.0000
@<TRIPOS>BOND
     1      1      2      1
     2      1     18      1
     3      2      3      1
     4      2      5      1
     5      3      4      1
     6      3      8      1
     7      4     17      1
     8      5      6      1
     9      6      7      1
    10      6      9      1
    11      7      8      1
    12      7     12      1
    13      9     10      1
    14     10     11      1
    15     10     13      1
    16     11     12      1
    17     11     16      1
    18     13     14      1
    19     14     15      1
    20     14     31      1
    21     15     16      1
    22     15     42      1
    23     17     18      1
    24     17     19      1
    25     18     22      1
    26     19     20      1
    27     19     76      1
    28     20     21      1
    29     20     23      1
    30     21     22      1
    31     21     26      1
    32     22     75      1
    33     23     24      1
    34     24     25      1
    35     24     27      1
    36     25     26      1
    37     25     30      1
    38     27     28      1
    39     28     29      1
    40     28     53      1
    41     29     30      1
    42     29     64      1
    43     31     32      1
    44     31     36      1
    45     32     33      1
    46     32     37      1
    47     33     34      1
    48     33     38      1
    49     34     35      1
    50     34     39      1
    51     35     36      1
    52     35     40      1
    53     36     41      1
    54     42     43      1
    55     42     47      1
    56     43     44      1
    57     43     48      1
    58     44     45      1
    59     44     49      1
    60     45     46      1
    61     45     50      1
    62     46     47      1
    63     46     51      1
    64     47     52      1
    65     53     54      1
    66     53     58      1
    67     54     55      1
    68     54     59      1
    69     55     56      1
    70     55     60      1
    71     56     57      1
    72     56     61      1
    73     57     58      1
    74     57     62      1
    75     58     63      1
    76     64     65      1
    77     64     69      1
    78     65     66      1
    79     65     70      1
    80     66     67      1
    81     66     71      1
    82     67     68      1
    83     67     72      1
    84     68     69      1
    85     68     73      1
    86     69     74      1
@<TRIPOS>SUBSTRUCTURE
      1 RES1       1

N14Ph4H2_B3LYP_Def2_TZVP_tauto1_TDDFT_Root2.mol
@<TRIPOS>MOLECULE
 T1 excited state 2 (Ph4H2N14HEPT,0)
    76     86      1
 SMALL
 NO_CHARGES
 ****
 ****
@<TRIPOS>ATOM
     1  N     0.0276    -1.4131    -0.0026  N.2   1 RES1    0.0000
     2  C    -1.0662    -0.7101    -0.0027  C.2   1 RES1    0.0000
     3  C    -1.0662     0.7101     0.0033  C.2   1 RES1    0.0000
     4  N     0.0276     1.4131     0.0033  N.2   1 RES1    0.0000
     5  C     1.2021     0.7247    -0.0024  C.2   1 RES1    0.0000
     6  C     1.2021    -0.7247     0.0031  C.2   1 RES1    0.0000
     7  N    -2.2965    -1.3696    -0.0105  N.pl3 1 RES1    0.0000
     8  C    -3.4938    -0.7342    -0.0184  C.2   1 RES1    0.0000
     9  C    -3.4938     0.7342     0.0189  C.2   1 RES1    0.0000
    10  N    -2.2965     1.3696     0.0111  N.pl3 1 RES1    0.0000
    11  N    -4.5993    -1.4238    -0.0658  N.2   1 RES1    0.0000
    12  C    -5.7603    -0.7171    -0.0632  C.2   1 RES1    0.0000
    13  C    -5.7603     0.7170     0.0635  C.2   1 RES1    0.0000
    14  N    -4.5993     1.4237     0.0661  N.2   1 RES1    0.0000
    15  N    -6.9038    -1.3714    -0.2223  N.2   1 RES1    0.0000
    16  C    -8.0510    -0.6960    -0.1826  C.2   1 RES1    0.0000
    17  C    -8.0510     0.6960     0.1825  C.2   1 RES1    0.0000
    18  N    -6.9038     1.3714     0.2225  N.2   1 RES1    0.0000
    19  N     2.3314     1.4248    -0.0210  N.2   1 RES1    0.0000
    20  C     3.4765     0.7336    -0.0254  C.2   1 RES1    0.0000
    21  C     3.4765    -0.7336     0.0259  C.2   1 RES1    0.0000
    22  N     2.3314    -1.4248     0.0217  N.2   1 RES1    0.0000
    23  N     4.6231     1.4268    -0.0952  N.2   1 RES1    0.0000
    24  C     5.7480     0.7211    -0.0795  C.2   1 RES1    0.0000
    25  C     5.7480    -0.7210     0.0796  C.2   1 RES1    0.0000
    26  N     4.6231    -1.4268     0.0956  N.2   1 RES1    0.0000
    27  N     6.9175     1.3725    -0.2642  N.2   1 RES1    0.0000
    28  C     8.0465     0.6997    -0.1987  C.2   1 RES1    0.0000
    29  C     8.0465    -0.6997     0.1986  C.2   1 RES1    0.0000
    30  N     6.9176    -1.3725     0.2643  N.2   1 RES1    0.0000
    31  C    -9.2438    -1.4525    -0.5936  C.2   1 RES1    0.0000
    32  C    -9.3113    -2.8307    -0.3264  C.2   1 RES1    0.0000
    33  C   -10.4010    -3.5747    -0.7419  C.2   1 RES1    0.0000
    34  C   -11.4321    -2.9686    -1.4593  C.2   1 RES1    0.0000
    35  C   -11.3638    -1.6105    -1.7581  C.2   1 RES1    0.0000
    36  C   -10.2853    -0.8565    -1.3266  C.2   1 RES1    0.0000
    37  H    -8.4974    -3.2962     0.2111  H     1 RES1    0.0000
    38  H   -10.4490    -4.6318    -0.5140  H     1 RES1    0.0000
    39  H   -12.2785    -3.5553    -1.7928  H     1 RES1    0.0000
    40  H   -12.1492    -1.1419    -2.3368  H     1 RES1    0.0000
    41  H   -10.2310     0.1919    -1.5837  H     1 RES1    0.0000
    42  C    -9.2439     1.4525     0.5933  C.2   1 RES1    0.0000
    43  C   -10.2855     0.8565     1.3262  C.2   1 RES1    0.0000
    44  C   -11.3641     1.6105     1.7575  C.2   1 RES1    0.0000
    45  C   -11.4323     2.9686     1.4586  C.2   1 RES1    0.0000
    46  C   -10.4010     3.5747     0.7414  C.2   1 RES1    0.0000
    47  C    -9.3113     2.8307     0.3261  C.2   1 RES1    0.0000
    48  H   -10.2313    -0.1919     1.5833  H     1 RES1    0.0000
    49  H   -12.1495     1.1420     2.3361  H     1 RES1    0.0000
    50  H   -12.2788     3.5553     1.7920  H     1 RES1    0.0000
    51  H   -10.4490     4.6317     0.5136  H     1 RES1    0.0000
    52  H    -8.4973     3.2961    -0.2113  H     1 RES1    0.0000
    53  C     9.2589     1.4452    -0.6056  C.2   1 RES1    0.0000
    54  C     9.3515     2.8131    -0.3149  C.2   1 RES1    0.0000
    55  C    10.4497     3.5502    -0.7292  C.2   1 RES1    0.0000
    56  C    11.4644     2.9431    -1.4647  C.2   1 RES1    0.0000
    57  C    11.3708     1.5922    -1.7826  C.2   1 RES1    0.0000
    58  C    10.2823     0.8470    -1.3524  C.2   1 RES1    0.0000
    59  H     8.5467     3.2827     0.2335  H     1 RES1    0.0000
    60  H    10.5127     4.6032    -0.4847  H     1 RES1    0.0000
    61  H    12.3181     3.5215    -1.7951  H     1 RES1    0.0000
    62  H    12.1456     1.1175    -2.3713  H     1 RES1    0.0000
    63  H    10.2169    -0.1996    -1.6156  H     1 RES1    0.0000
    64  C     9.2590    -1.4452     0.6054  C.2   1 RES1    0.0000
    65  C    10.2825    -0.8470     1.3519  C.2   1 RES1    0.0000
    66  C    11.3710    -1.5921     1.7820  C.2   1 RES1    0.0000
    67  C    11.4646    -2.9431     1.4642  C.2   1 RES1    0.0000
    68  C    10.4498    -3.5502     0.7287  C.2   1 RES1    0.0000
    69  C     9.3516    -2.8131     0.3146  C.2   1 RES1    0.0000
    70  H    10.2171     0.1996     1.6152  H     1 RES1    0.0000
    71  H    12.1459    -1.1175     2.3706  H     1 RES1    0.0000
    72  H    12.3183    -3.5215     1.7944  H     1 RES1    0.0000
    73  H    10.5128    -4.6031     0.4842  H     1 RES1    0.0000
    74  H     8.5467    -3.2827    -0.2337  H     1 RES1    0.0000
    75  H    -2.2870    -2.3820    -0.0332  H     1 RES1    0.0000
    76  H    -2.2871     2.3820     0.0337  H     1 RES1    0.0000
@<TRIPOS>BOND
     1      1      2      1
     2      1      6      1
     3      2      3      1
     4      2      7      1
     5      3      4      1
     6      3     10      1
     7      4      5      1
     8      5      6      1
     9      5     19      1
    10      6     22      1
    11      7      8      1
    12      7     75      1
    13      8      9      1
    14      8     11      1
    15      9     10      1
    16      9     14      1
    17     10     76      1
    18     11     12      1
    19     12     13      1
    20     12     15      1
    21     13     14      1
    22     13     18      1
    23     15     16      1
    24     16     17      1
    25     16     31      1
    26     17     18      1
    27     17     42      1
    28     19     20      1
    29     20     21      1
    30     20     23      1
    31     21     22      1
    32     21     26      1
    33     23     24      1
    34     24     25      1
    35     24     27      1
    36     25     26      1
    37     25     30      1
    38     27     28      1
    39     28     29      1
    40     28     53      1
    41     29     30      1
    42     29     64      1
    43     31     32      1
    44     31     36      1
    45     32     33      1
    46     32     37      1
    47     33     34      1
    48     33     38      1
    49     34     35      1
    50     34     39      1
    51     35     36      1
    52     35     40      1
    53     36     41      1
    54     42     43      1
    55     42     47      1
    56     43     44      1
    57     43     48      1
    58     44     45      1
    59     44     49      1
    60     45     46      1
    61     45     50      1
    62     46     47      1
    63     46     51      1
    64     47     52      1
    65     53     54      1
    66     53     58      1
    67     54     55      1
    68     54     59      1
    69     55     56      1
    70     55     60      1
    71     56     57      1
    72     56     61      1
    73     57     58      1
    74     57     62      1
    75     58     63      1
    76     64     65      1
    77     64     69      1
    78     65     66      1
    79     65     70      1
    80     66     67      1
    81     66     71      1
    82     67     68      1
    83     67     72      1
    84     68     69      1
    85     68     73      1
    86     69     74      1
@<TRIPOS>SUBSTRUCTURE
      1 RES1       1

N14Ph4H2_B3LYP_Def2_TZVP_tauto2.mol
@<TRIPOS>MOLECULE
 T2 ground state (Ph4H2N14HEPT,0)
    76     86      1
 SMALL
 NO_CHARGES
 ****
 ****
@<TRIPOS>ATOM
     1  N    -0.0512     1.4227    -0.1417  N.2   1 RES1    0.0000
     2  C     1.0578     0.7324    -0.0772  C.2   1 RES1    0.0000
     3  C     1.0578    -0.7325     0.0768  C.2   1 RES1    0.0000
     4  N    -0.0512    -1.4228     0.1413  N.2   1 RES1    0.0000
     5  C    -1.2194    -0.7279     0.0657  C.2   1 RES1    0.0000
     6  C    -1.2194     0.7278    -0.0661  C.2   1 RES1    0.0000
     7  N     2.2466     1.4213    -0.1566  N.2   1 RES1    0.0000
     8  C     3.3382     0.7313    -0.0824  C.2   1 RES1    0.0000
     9  C     3.3382    -0.7314     0.0817  C.2   1 RES1    0.0000
    10  N     2.2466    -1.4214     0.1560  N.2   1 RES1    0.0000
    11  N     4.5531     1.3628    -0.1575  N.pl3 1 RES1    0.0000
    12  C     5.7671     0.6984    -0.0920  C.2   1 RES1    0.0000
    13  C     5.7671    -0.6985     0.0914  C.2   1 RES1    0.0000
    14  N     4.5530    -1.3629     0.1566  N.pl3 1 RES1    0.0000
    15  N     6.8910     1.3671    -0.2215  N.2   1 RES1    0.0000
    16  C     8.0574     0.6939    -0.1451  C.2   1 RES1    0.0000
    17  C     8.0574    -0.6940     0.1449  C.2   1 RES1    0.0000
    18  N     6.8910    -1.3672     0.2212  N.2   1 RES1    0.0000
    19  N    -2.3477    -1.4232     0.1123  N.2   1 RES1    0.0000
    20  C    -3.4939    -0.7280     0.0459  C.2   1 RES1    0.0000
    21  C    -3.4939     0.7280    -0.0460  C.2   1 RES1    0.0000
    22  N    -2.3477     1.4232    -0.1126  N.2   1 RES1    0.0000
    23  N    -4.6447    -1.4286     0.0485  N.2   1 RES1    0.0000
    24  C    -5.7627    -0.7250    -0.0006  C.2   1 RES1    0.0000
    25  C    -5.7627     0.7250     0.0005  C.2   1 RES1    0.0000
    26  N    -4.6447     1.4286    -0.0485  N.2   1 RES1    0.0000
    27  N    -6.9431    -1.4036    -0.1180  N.2   1 RES1    0.0000
    28  C    -8.0612    -0.7286    -0.1260  C.2   1 RES1    0.0000
    29  C    -8.0612     0.7286     0.1261  C.2   1 RES1    0.0000
    30  N    -6.9431     1.4036     0.1181  N.2   1 RES1    0.0000
    31  C     9.2717     1.5055    -0.4181  C.2   1 RES1    0.0000
    32  C     9.3733     2.7987     0.1131  C.2   1 RES1    0.0000
    33  C    10.4822     3.5929    -0.1631  C.2   1 RES1    0.0000
    34  C    11.4970     3.1151    -0.9915  C.2   1 RES1    0.0000
    35  C    11.3946     1.8381    -1.5420  C.2   1 RES1    0.0000
    36  C    10.2938     1.0366    -1.2545  C.2   1 RES1    0.0000
    37  H     8.5764     3.1769     0.7434  H     1 RES1    0.0000
    38  H    10.5516     4.5877     0.2649  H     1 RES1    0.0000
    39  H    12.3588     3.7363    -1.2124  H     1 RES1    0.0000
    40  H    12.1720     1.4650    -2.2007  H     1 RES1    0.0000
    41  H    10.2242     0.0474    -1.6922  H     1 RES1    0.0000
    42  C     9.2717    -1.5056     0.4182  C.2   1 RES1    0.0000
    43  C    10.2935    -1.0365     1.2548  C.2   1 RES1    0.0000
    44  C    11.3943    -1.8379     1.5427  C.2   1 RES1    0.0000
    45  C    11.4968    -3.1149     0.9924  C.2   1 RES1    0.0000
    46  C    10.4823    -3.5928     0.1637  C.2   1 RES1    0.0000
    47  C     9.3734    -2.7988    -0.1128  C.2   1 RES1    0.0000
    48  H    10.2238    -0.0473     1.6925  H     1 RES1    0.0000
    49  H    12.1715    -1.4648     2.2016  H     1 RES1    0.0000
    50  H    12.3587    -3.7361     1.2135  H     1 RES1    0.0000
    51  H    10.5518    -4.5877    -0.2642  H     1 RES1    0.0000
    52  H     8.5767    -3.1771    -0.7433  H     1 RES1    0.0000
    53  C    -9.2874    -1.5015    -0.4471  C.2   1 RES1    0.0000
    54  C    -9.3999    -2.8242     0.0074  C.2   1 RES1    0.0000
    55  C   -10.5101    -3.5919    -0.3259  C.2   1 RES1    0.0000
    56  C   -11.5103    -3.0612    -1.1413  C.2   1 RES1    0.0000
    57  C   -11.3944    -1.7567    -1.6194  C.2   1 RES1    0.0000
    58  C   -10.2967    -0.9770    -1.2676  C.2   1 RES1    0.0000
    59  H    -8.6058    -3.2390     0.6167  H     1 RES1    0.0000
    60  H   -10.5912    -4.6090     0.0435  H     1 RES1    0.0000
    61  H   -12.3726    -3.6638    -1.4081  H     1 RES1    0.0000
    62  H   -12.1599    -1.3439    -2.2681  H     1 RES1    0.0000
    63  H   -10.2191     0.0345    -1.6485  H     1 RES1    0.0000
    64  C    -9.2874     1.5015     0.4473  C.2   1 RES1    0.0000
    65  C   -10.2966     0.9771     1.2679  C.2   1 RES1    0.0000
    66  C   -11.3943     1.7568     1.6197  C.2   1 RES1    0.0000
    67  C   -11.5102     3.0612     1.1417  C.2   1 RES1    0.0000
    68  C   -10.5100     3.5919     0.3262  C.2   1 RES1    0.0000
    69  C    -9.3999     2.8242    -0.0071  C.2   1 RES1    0.0000
    70  H   -10.2190    -0.0345     1.6487  H     1 RES1    0.0000
    71  H   -12.1597     1.3439     2.2685  H     1 RES1    0.0000
    72  H   -12.3725     3.6638     1.4085  H     1 RES1    0.0000
    73  H   -10.5912     4.6090    -0.0432  H     1 RES1    0.0000
    74  H    -8.6058     3.2391    -0.6165  H     1 RES1    0.0000
    75  H     4.5556     2.3679    -0.2920  H     1 RES1    0.0000
    76  H     4.5556    -2.3680     0.2912  H     1 RES1    0.0000
@<TRIPOS>BOND
     1      1      2      1
     2      1      6      1
     3      2      3      1
     4      2      7      1
     5      3      4      1
     6      3     10      1
     7      4      5      1
     8      5      6      1
     9      5     19      1
    10      6     22      1
    11      7      8      1
    12      8      9      1
    13      8     11      1
    14      9     10      1
    15      9     14      1
    16     11     12      1
    17     11     75      1
    18     12     13      1
    19     12     15      1
    20     13     14      1
    21     13     18      1
    22     14     76      1
    23     15     16      1
    24     16     17      1
    25     16     31      1
    26     17     18      1
    27     17     42      1
    28     19     20      1
    29     20     21      1
    30     20     23      1
    31     21     22      1
    32     21     26      1
    33     23     24      1
    34     24     25      1
    35     24     27      1
    36     25     26      1
    37     25     30      1
    38     27     28      1
    39     28     29      1
    40     28     53      1
    41     29     30      1
    42     29     64      1
    43     31     32      1
    44     31     36      1
    45     32     33      1
    46     32     37      1
    47     33     34      1
    48     33     38      1
    49     34     35      1
    50     34     39      1
    51     35     36      1
    52     35     40      1
    53     36     41      1
    54     42     43      1
    55     42     47      1
    56     43     44      1
    57     43     48      1
    58     44     45      1
    59     44     49      1
    60     45     46      1
    61     45     50      1
    62     46     47      1
    63     46     51      1
    64     47     52      1
    65     53     54      1
    66     53     58      1
    67     54     55      1
    68     54     59      1
    69     55     56      1
    70     55     60      1
    71     56     57      1
    72     56     61      1
    73     57     58      1
    74     57     62      1
    75     58     63      1
    76     64     65      1
    77     64     69      1
    78     65     66      1
    79     65     70      1
    80     66     67      1
    81     66     71      1
    82     67     68      1
    83     67     72      1
    84     68     69      1
    85     68     73      1
    86     69     74      1
@<TRIPOS>SUBSTRUCTURE
      1 RES1       1

N14Ph4H2_B3LYP_Def2_TZVP_tauto2_TDDFT_Root3.mol
@<TRIPOS>MOLECULE
 T2 excited state 3 (Ph4H2N14HEPT,0)
    76     86      1
 SMALL
 NO_CHARGES
 ****
 ****
@<TRIPOS>ATOM
     1  N    -0.0544     1.4187    -0.0859  N.2   1 RES1    0.0000
     2  C     1.0670     0.7197    -0.0465  C.2   1 RES1    0.0000
     3  C     1.0670    -0.7197     0.0465  C.2   1 RES1    0.0000
     4  N    -0.0544    -1.4187     0.0859  N.2   1 RES1    0.0000
     5  C    -1.2044    -0.7289     0.0383  C.2   1 RES1    0.0000
     6  C    -1.2044     0.7289    -0.0383  C.2   1 RES1    0.0000
     7  N     2.2527     1.4109    -0.0934  N.2   1 RES1    0.0000
     8  C     3.3403     0.7183    -0.0475  C.2   1 RES1    0.0000
     9  C     3.3403    -0.7183     0.0476  C.2   1 RES1    0.0000
    10  N     2.2527    -1.4109     0.0934  N.2   1 RES1    0.0000
    11  N     4.5703     1.3753    -0.0941  N.pl3 1 RES1    0.0000
    12  C     5.7632     0.7150    -0.0737  C.2   1 RES1    0.0000
    13  C     5.7632    -0.7150     0.0738  C.2   1 RES1    0.0000
    14  N     4.5703    -1.3753     0.0942  N.pl3 1 RES1    0.0000
    15  N     6.8880     1.3680    -0.2097  N.2   1 RES1    0.0000
    16  C     8.0575     0.6914    -0.1600  C.2   1 RES1    0.0000
    17  C     8.0575    -0.6914     0.1600  C.2   1 RES1    0.0000
    18  N     6.8880    -1.3680     0.2097  N.2   1 RES1    0.0000
    19  N    -2.3478    -1.4270     0.0551  N.2   1 RES1    0.0000
    20  C    -3.4822    -0.7366     0.0126  C.2   1 RES1    0.0000
    21  C    -3.4822     0.7366    -0.0127  C.2   1 RES1    0.0000
    22  N    -2.3478     1.4270    -0.0551  N.2   1 RES1    0.0000
    23  N    -4.6360    -1.4310    -0.0256  N.2   1 RES1    0.0000
    24  C    -5.7545    -0.7259    -0.0447  C.2   1 RES1    0.0000
    25  C    -5.7545     0.7259     0.0447  C.2   1 RES1    0.0000
    26  N    -4.6360     1.4310     0.0255  N.2   1 RES1    0.0000
    27  N    -6.9281    -1.3847    -0.2035  N.2   1 RES1    0.0000
    28  C    -8.0532    -0.7108    -0.1700  C.2   1 RES1    0.0000
    29  C    -8.0532     0.7108     0.1699  C.2   1 RES1    0.0000
    30  N    -6.9281     1.3847     0.2035  N.2   1 RES1    0.0000
    31  C     9.2458     1.4797    -0.5144  C.2   1 RES1    0.0000
    32  C     9.3033     2.8400    -0.1673  C.2   1 RES1    0.0000
    33  C    10.3929     3.6140    -0.5265  C.2   1 RES1    0.0000
    34  C    11.4351     3.0574    -1.2661  C.2   1 RES1    0.0000
    35  C    11.3777     1.7187    -1.6436  C.2   1 RES1    0.0000
    36  C    10.2992     0.9347    -1.2694  C.2   1 RES1    0.0000
    37  H     8.4859     3.2721     0.3923  H     1 RES1    0.0000
    38  H    10.4316     4.6558    -0.2355  H     1 RES1    0.0000
    39  H    12.2813     3.6673    -1.5556  H     1 RES1    0.0000
    40  H    12.1717     1.2885    -2.2401  H     1 RES1    0.0000
    41  H    10.2541    -0.0970    -1.5879  H     1 RES1    0.0000
    42  C     9.2458    -1.4797     0.5144  C.2   1 RES1    0.0000
    43  C    10.2992    -0.9347     1.2694  C.2   1 RES1    0.0000
    44  C    11.3778    -1.7187     1.6436  C.2   1 RES1    0.0000
    45  C    11.4352    -3.0574     1.2661  C.2   1 RES1    0.0000
    46  C    10.3929    -3.6140     0.5264  C.2   1 RES1    0.0000
    47  C     9.3033    -2.8400     0.1673  C.2   1 RES1    0.0000
    48  H    10.2541     0.0970     1.5879  H     1 RES1    0.0000
    49  H    12.1717    -1.2885     2.2401  H     1 RES1    0.0000
    50  H    12.2813    -3.6673     1.5555  H     1 RES1    0.0000
    51  H    10.4316    -4.6558     0.2354  H     1 RES1    0.0000
    52  H     8.4859    -3.2721    -0.3923  H     1 RES1    0.0000
    53  C    -9.2668    -1.4682    -0.5496  C.2   1 RES1    0.0000
    54  C    -9.3619    -2.8239    -0.2075  C.2   1 RES1    0.0000
    55  C   -10.4605    -3.5742    -0.5963  C.2   1 RES1    0.0000
    56  C   -11.4721    -2.9935    -1.3568  C.2   1 RES1    0.0000
    57  C   -11.3758    -1.6557    -1.7249  C.2   1 RES1    0.0000
    58  C   -10.2876    -0.8963    -1.3197  C.2   1 RES1    0.0000
    59  H    -8.5591    -3.2738     0.3599  H     1 RES1    0.0000
    60  H   -10.5259    -4.6171    -0.3124  H     1 RES1    0.0000
    61  H   -12.3260    -3.5826    -1.6672  H     1 RES1    0.0000
    62  H   -12.1486    -1.2023    -2.3327  H     1 RES1    0.0000
    63  H   -10.2207     0.1399    -1.6211  H     1 RES1    0.0000
    64  C    -9.2668     1.4682     0.5496  C.2   1 RES1    0.0000
    65  C   -10.2876     0.8962     1.3197  C.2   1 RES1    0.0000
    66  C   -11.3758     1.6557     1.7250  C.2   1 RES1    0.0000
    67  C   -11.4721     2.9935     1.3568  C.2   1 RES1    0.0000
    68  C   -10.4605     3.5742     0.5963  C.2   1 RES1    0.0000
    69  C    -9.3619     2.8239     0.2075  C.2   1 RES1    0.0000
    70  H   -10.2207    -0.1399     1.6211  H     1 RES1    0.0000
    71  H   -12.1486     1.2023     2.3328  H     1 RES1    0.0000
    72  H   -12.3260     3.5826     1.6672  H     1 RES1    0.0000
    73  H   -10.5259     4.6171     0.3125  H     1 RES1    0.0000
    74  H    -8.5591     3.2738    -0.3599  H     1 RES1    0.0000
    75  H     4.5634     2.3809    -0.2034  H     1 RES1    0.0000
    76  H     4.5634    -2.3809     0.2034  H     1 RES1    0.0000
@<TRIPOS>BOND
     1      1      2      1
     2      1      6      1
     3      2      3      1
     4      2      7      1
     5      3      4      1
     6      3     10      1
     7      4      5      1
     8      5      6      1
     9      5     19      1
    10      6     22      1
    11      7      8      1
    12      8      9      1
    13      8     11      1
    14      9     10      1
    15      9     14      1
    16     11     12      1
    17     11     75      1
    18     12     13      1
    19     12     15      1
    20     13     14      1
    21     13     18      1
    22     14     76      1
    23     15     16      1
    24     16     17      1
    25     16     31      1
    26     17     18      1
    27     17     42      1
    28     19     20      1
    29     20     21      1
    30     20     23      1
    31     21     22      1
    32     21     26      1
    33     23     24      1
    34     24     25      1
    35     24     27      1
    36     25     26      1
    37     25     30      1
    38     27     28      1
    39     28     29      1
    40     28     53      1
    41     29     30      1
    42     29     64      1
    43     31     32      1
    44     31     36      1
    45     32     33      1
    46     32     37      1
    47     33     34      1
    48     33     38      1
    49     34     35      1
    50     34     39      1
    51     35     36      1
    52     35     40      1
    53     36     41      1
    54     42     43      1
    55     42     47      1
    56     43     44      1
    57     43     48      1
    58     44     45      1
    59     44     49      1
    60     45     46      1
    61     45     50      1
    62     46     47      1
    63     46     51      1
    64     47     52      1
    65     53     54      1
    66     53     58      1
    67     54     55      1
    68     54     59      1
    69     55     56      1
    70     55     60      1
    71     56     57      1
    72     56     61      1
    73     57     58      1
    74     57     62      1
    75     58     63      1
    76     64     65      1
    77     64     69      1
    78     65     66      1
    79     65     70      1
    80     66     67      1
    81     66     71      1
    82     67     68      1
    83     67     72      1
    84     68     69      1
    85     68     73      1
    86     69     74      1
@<TRIPOS>SUBSTRUCTURE
      1 RES1       1

N14Ph4H2_B3LYP_Def2_TZVP_tauto3.mol
@<TRIPOS>MOLECULE
 T3 ground state (Ph4H2N14HEPT,0)
    76     86      1
 SMALL
 NO_CHARGES
 ****
 ****
@<TRIPOS>ATOM
     1  N     0.0562     1.4109     0.2090  N.2   1 RES1    0.0000
     2  C     1.2134     0.7237     0.1019  C.2   1 RES1    0.0000
     3  C     1.2134    -0.7237    -0.1019  C.2   1 RES1    0.0000
     4  N     0.0562    -1.4109    -0.2090  N.2   1 RES1    0.0000
     5  C    -1.0608    -0.7258    -0.1110  C.2   1 RES1    0.0000
     6  C    -1.0608     0.7258     0.1110  C.2   1 RES1    0.0000
     7  N     2.3466     1.4125     0.1835  N.2   1 RES1    0.0000
     8  C     3.4856     0.7249     0.0833  C.2   1 RES1    0.0000
     9  C     3.4856    -0.7249    -0.0833  C.2   1 RES1    0.0000
    10  N     2.3466    -1.4125    -0.1835  N.2   1 RES1    0.0000
    11  N     4.6385     1.4206     0.1234  N.2   1 RES1    0.0000
    12  C     5.7521     0.7234     0.0382  C.2   1 RES1    0.0000
    13  C     5.7521    -0.7234    -0.0382  C.2   1 RES1    0.0000
    14  N     4.6385    -1.4206    -0.1234  N.2   1 RES1    0.0000
    15  N     6.9328     1.4028    -0.0369  N.2   1 RES1    0.0000
    16  C     8.0489     0.7340    -0.0818  C.2   1 RES1    0.0000
    17  C     8.0489    -0.7340     0.0818  C.2   1 RES1    0.0000
    18  N     6.9328    -1.4028     0.0369  N.2   1 RES1    0.0000
    19  N    -2.2335    -1.4106    -0.2216  N.2   1 RES1    0.0000
    20  C    -3.3389    -0.7314    -0.1169  C.2   1 RES1    0.0000
    21  C    -3.3389     0.7314     0.1169  C.2   1 RES1    0.0000
    22  N    -2.2335     1.4106     0.2217  N.2   1 RES1    0.0000
    23  N    -4.5250    -1.4128    -0.2263  N.2   1 RES1    0.0000
    24  C    -5.6119    -0.7198    -0.1146  C.2   1 RES1    0.0000
    25  C    -5.6119     0.7198     0.1146  C.2   1 RES1    0.0000
    26  N    -4.5250     1.4128     0.2263  N.2   1 RES1    0.0000
    27  N    -6.8296    -1.3186    -0.2169  N.pl3 1 RES1    0.0000
    28  C    -8.0596    -0.6698    -0.1211  C.2   1 RES1    0.0000
    29  C    -8.0596     0.6698     0.1211  C.2   1 RES1    0.0000
    30  N    -6.8296     1.3186     0.2169  N.pl3 1 RES1    0.0000
    31  C     9.2719     1.5259    -0.3550  C.2   1 RES1    0.0000
    32  C     9.3831     2.8151     0.1782  C.2   1 RES1    0.0000
    33  C    10.4875     3.6027    -0.1094  C.2   1 RES1    0.0000
    34  C    11.4845     3.1270    -0.9558  C.2   1 RES1    0.0000
    35  C    11.3710     1.8571    -1.5105  C.2   1 RES1    0.0000
    36  C    10.2784     1.0569    -1.2057  C.2   1 RES1    0.0000
    37  H     8.5906     3.1883     0.8121  H     1 RES1    0.0000
    38  H    10.5670     4.5931     0.3206  H     1 RES1    0.0000
    39  H    12.3425     3.7456    -1.1867  H     1 RES1    0.0000
    40  H    12.1342     1.4874    -2.1832  H     1 RES1    0.0000
    41  H    10.2014     0.0728    -1.6469  H     1 RES1    0.0000
    42  C     9.2719    -1.5259     0.3550  C.2   1 RES1    0.0000
    43  C    10.2784    -1.0569     1.2057  C.2   1 RES1    0.0000
    44  C    11.3710    -1.8571     1.5105  C.2   1 RES1    0.0000
    45  C    11.4845    -3.1270     0.9558  C.2   1 RES1    0.0000
    46  C    10.4875    -3.6027     0.1094  C.2   1 RES1    0.0000
    47  C     9.3831    -2.8151    -0.1782  C.2   1 RES1    0.0000
    48  H    10.2014    -0.0728     1.6469  H     1 RES1    0.0000
    49  H    12.1342    -1.4874     2.1832  H     1 RES1    0.0000
    50  H    12.3425    -3.7456     1.1867  H     1 RES1    0.0000
    51  H    10.5670    -4.5931    -0.3206  H     1 RES1    0.0000
    52  H     8.5906    -3.1883    -0.8121  H     1 RES1    0.0000
    53  C    -9.2437    -1.5319    -0.3167  C.2   1 RES1    0.0000
    54  C    -9.3460    -2.7453     0.3740  C.2   1 RES1    0.0000
    55  C   -10.4349    -3.5835     0.1724  C.2   1 RES1    0.0000
    56  C   -11.4353    -3.2244    -0.7231  C.2   1 RES1    0.0000
    57  C   -11.3389    -2.0239    -1.4189  C.2   1 RES1    0.0000
    58  C   -10.2513    -1.1849    -1.2217  C.2   1 RES1    0.0000
    59  H    -8.5834    -3.0257     1.0909  H     1 RES1    0.0000
    60  H   -10.5028    -4.5145     0.7203  H     1 RES1    0.0000
    61  H   -12.2830    -3.8783    -0.8816  H     1 RES1    0.0000
    62  H   -12.1082    -1.7438    -2.1269  H     1 RES1    0.0000
    63  H   -10.1753    -0.2609    -1.7786  H     1 RES1    0.0000
    64  C    -9.2437     1.5319     0.3167  C.2   1 RES1    0.0000
    65  C   -10.2513     1.1849     1.2217  C.2   1 RES1    0.0000
    66  C   -11.3389     2.0239     1.4188  C.2   1 RES1    0.0000
    67  C   -11.4353     3.2244     0.7231  C.2   1 RES1    0.0000
    68  C   -10.4349     3.5835    -0.1724  C.2   1 RES1    0.0000
    69  C    -9.3460     2.7453    -0.3740  C.2   1 RES1    0.0000
    70  H   -10.1753     0.2609     1.7786  H     1 RES1    0.0000
    71  H   -12.1082     1.7438     2.1269  H     1 RES1    0.0000
    72  H   -12.2830     3.8783     0.8816  H     1 RES1    0.0000
    73  H   -10.5028     4.5145    -0.7203  H     1 RES1    0.0000
    74  H    -8.5834     3.0257    -1.0909  H     1 RES1    0.0000
    75  H    -6.8162     2.3050     0.4410  H     1 RES1    0.0000
    76  H    -6.8162    -2.3050    -0.4410  H     1 RES1    0.0000
@<TRIPOS>BOND
     1      1      2      1
     2      1      6      1
     3      2      3      1
     4      2      7      1
     5      3      4      1
     6      3     10      1
     7      4      5      1
     8      5      6      1
     9      5     19      1
    10      6     22      1
    11      7      8      1
    12      8      9      1
    13      8     11      1
    14      9     10      1
    15      9     14      1
    16     11     12      1
    17     12     13      1
    18     12     15      1
    19     13     14      1
    20     13     18      1
    21     15     16      1
    22     16     17      1
    23     16     31      1
    24     17     18      1
    25     17     42      1
    26     19     20      1
    27     20     21      1
    28     20     23      1
    29     21     22      1
    30     21     26      1
    31     23     24      1
    32     24     25      1
    33     24     27      1
    34     25     26      1
    35     25     30      1
    36     27     28      1
    37     27     76      1
    38     28     29      1
    39     28     53      1
    40     29     30      1
    41     29     64      1
    42     30     75      1
    43     31     32      1
    44     31     36      1
    45     32     33      1
    46     32     37      1
    47     33     34      1
    48     33     38      1
    49     34     35      1
    50     34     39      1
    51     35     36      1
    52     35     40      1
    53     36     41      1
    54     42     43      1
    55     42     47      1
    56     43     44      1
    57     43     48      1
    58     44     45      1
    59     44     49      1
    60     45     46      1
    61     45     50      1
    62     46     47      1
    63     46     51      1
    64     47     52      1
    65     53     54      1
    66     53     58      1
    67     54     55      1
    68     54     59      1
    69     55     56      1
    70     55     60      1
    71     56     57      1
    72     56     61      1
    73     57     58      1
    74     57     62      1
    75     58     63      1
    76     64     65      1
    77     64     69      1
    78     65     66      1
    79     65     70      1
    80     66     67      1
    81     66     71      1
    82     67     68      1
    83     67     72      1
    84     68     69      1
    85     68     73      1
    86     69     74      1
@<TRIPOS>SUBSTRUCTURE
      1 RES1       1

N14Ph4H_B3LYP_Def2_TZVP_-H_-1.mol
@<TRIPOS>MOLECULE
 MA ground state (Ph4HN14HEPT,-1)
    75     85      1
 SMALL
 NO_CHARGES
 ****
 ****
@<TRIPOS>ATOM
     1  N     0.0000    -1.3171    -0.0000  N.pl3 1 RES1    0.0000
     2  C     1.2031    -0.6698     0.0042  C.2   1 RES1    0.0000
     3  C     1.1599     0.8020    -0.0099  C.2   1 RES1    0.0000
     4  N     0.0000     1.4687     0.0000  N.2   1 RES1    0.0000
     5  C    -1.1599     0.8020     0.0100  C.2   1 RES1    0.0000
     6  C    -1.2031    -0.6698    -0.0042  C.2   1 RES1    0.0000
     7  N     2.2845    -1.3848     0.0211  N.2   1 RES1    0.0000
     8  C     3.4654    -0.6981     0.0174  C.2   1 RES1    0.0000
     9  C     3.4572     0.7657    -0.0338  C.2   1 RES1    0.0000
    10  N     2.3051     1.4660    -0.0346  N.2   1 RES1    0.0000
    11  N     4.5804    -1.3973     0.0693  N.2   1 RES1    0.0000
    12  C     5.7298    -0.6993     0.0510  C.2   1 RES1    0.0000
    13  C     5.7331     0.7276    -0.0691  C.2   1 RES1    0.0000
    14  N     4.6021     1.4416    -0.0895  N.2   1 RES1    0.0000
    15  N     6.8867    -1.3739     0.1844  N.2   1 RES1    0.0000
    16  C     8.0250    -0.7105     0.1399  C.2   1 RES1    0.0000
    17  C     8.0330     0.7032    -0.1454  C.2   1 RES1    0.0000
    18  N     6.9077     1.3837    -0.2004  N.2   1 RES1    0.0000
    19  N    -2.3051     1.4660     0.0347  N.2   1 RES1    0.0000
    20  C    -3.4572     0.7657     0.0339  C.2   1 RES1    0.0000
    21  C    -3.4654    -0.6981    -0.0174  C.2   1 RES1    0.0000
    22  N    -2.2845    -1.3848    -0.0211  N.2   1 RES1    0.0000
    23  N    -4.6021     1.4416     0.0895  N.2   1 RES1    0.0000
    24  C    -5.7331     0.7276     0.0691  C.2   1 RES1    0.0000
    25  C    -5.7298    -0.6993    -0.0511  C.2   1 RES1    0.0000
    26  N    -4.5803    -1.3973    -0.0693  N.2   1 RES1    0.0000
    27  N    -6.9076     1.3836     0.2005  N.2   1 RES1    0.0000
    28  C    -8.0330     0.7032     0.1454  C.2   1 RES1    0.0000
    29  C    -8.0250    -0.7105    -0.1400  C.2   1 RES1    0.0000
    30  N    -6.8867    -1.3739    -0.1845  N.2   1 RES1    0.0000
    31  C     9.2403    -1.5111     0.4471  C.2   1 RES1    0.0000
    32  C     9.3366    -2.8229    -0.0292  C.2   1 RES1    0.0000
    33  C    10.4344    -3.6126     0.2829  C.2   1 RES1    0.0000
    34  C    11.4490    -3.1136     1.0938  C.2   1 RES1    0.0000
    35  C    11.3531    -1.8187     1.5913  C.2   1 RES1    0.0000
    36  C    10.2615    -1.0231     1.2678  C.2   1 RES1    0.0000
    37  H     8.5318    -3.2149    -0.6361  H     1 RES1    0.0000
    38  H    10.4950    -4.6231    -0.1025  H     1 RES1    0.0000
    39  H    12.3030    -3.7316     1.3427  H     1 RES1    0.0000
    40  H    12.1284    -1.4259     2.2376  H     1 RES1    0.0000
    41  H    10.1971    -0.0200     1.6671  H     1 RES1    0.0000
    42  C     9.2625     1.4872    -0.4451  C.2   1 RES1    0.0000
    43  C    10.2790     0.9863    -1.2632  C.2   1 RES1    0.0000
    44  C    11.3828     1.7675    -1.5809  C.2   1 RES1    0.0000
    45  C    11.4950     3.0592    -1.0787  C.2   1 RES1    0.0000
    46  C    10.4850     3.5704    -0.2698  C.2   1 RES1    0.0000
    47  C     9.3745     2.7957     0.0354  C.2   1 RES1    0.0000
    48  H    10.2017    -0.0148    -1.6652  H     1 RES1    0.0000
    49  H    12.1546     1.3660    -2.2260  H     1 RES1    0.0000
    50  H    12.3585     3.6659    -1.3229  H     1 RES1    0.0000
    51  H    10.5581     4.5790     0.1182  H     1 RES1    0.0000
    52  H     8.5720     3.1976     0.6387  H     1 RES1    0.0000
    53  C    -9.2625     1.4872     0.4451  C.2   1 RES1    0.0000
    54  C    -9.3745     2.7957    -0.0353  C.2   1 RES1    0.0000
    55  C   -10.4850     3.5704     0.2699  C.2   1 RES1    0.0000
    56  C   -11.4951     3.0591     1.0787  C.2   1 RES1    0.0000
    57  C   -11.3829     1.7673     1.5807  C.2   1 RES1    0.0000
    58  C   -10.2791     0.9862     1.2631  C.2   1 RES1    0.0000
    59  H    -8.5719     3.1977    -0.6386  H     1 RES1    0.0000
    60  H   -10.5581     4.5790    -0.1180  H     1 RES1    0.0000
    61  H   -12.3585     3.6657     1.3228  H     1 RES1    0.0000
    62  H   -12.1548     1.3658     2.2257  H     1 RES1    0.0000
    63  H   -10.2018    -0.0150     1.6650  H     1 RES1    0.0000
    64  C    -9.2403    -1.5111    -0.4471  C.2   1 RES1    0.0000
    65  C   -10.2616    -1.0230    -1.2677  C.2   1 RES1    0.0000
    66  C   -11.3532    -1.8186    -1.5911  C.2   1 RES1    0.0000
    67  C   -11.4491    -3.1135    -1.0938  C.2   1 RES1    0.0000
    68  C   -10.4344    -3.6125    -0.2830  C.2   1 RES1    0.0000
    69  C    -9.3366    -2.8229     0.0291  C.2   1 RES1    0.0000
    70  H   -10.1972    -0.0199    -1.6669  H     1 RES1    0.0000
    71  H   -12.1285    -1.4257    -2.2374  H     1 RES1    0.0000
    72  H   -12.3031    -3.7315    -1.3426  H     1 RES1    0.0000
    73  H   -10.4949    -4.6231     0.1024  H     1 RES1    0.0000
    74  H    -8.5317    -3.2150     0.6359  H     1 RES1    0.0000
    75  H     0.0000    -2.3299    -0.0001  H     1 RES1    0.0000
@<TRIPOS>BOND
     1      1      2      1
     2      1      6      1
     3      1     75      1
     4      2      3      1
     5      2      7      1
     6      3      4      1
     7      3     10      1
     8      4      5      1
     9      5      6      1
    10      5     19      1
    11      6     22      1
    12      7      8      1
    13      8      9      1
    14      8     11      1
    15      9     10      1
    16      9     14      1
    17     11     12      1
    18     12     13      1
    19     12     15      1
    20     13     14      1
    21     13     18      1
    22     15     16      1
    23     16     17      1
    24     16     31      1
    25     17     18      1
    26     17     42      1
    27     19     20      1
    28     20     21      1
    29     20     23      1
    30     21     22      1
    31     21     26      1
    32     23     24      1
    33     24     25      1
    34     24     27      1
    35     25     26      1
    36     25     30      1
    37     27     28      1
    38     28     29      1
    39     28     53      1
    40     29     30      1
    41     29     64      1
    42     31     32      1
    43     31     36      1
    44     32     33      1
    45     32     37      1
    46     33     34      1
    47     33     38      1
    48     34     35      1
    49     34     39      1
    50     35     36      1
    51     35     40      1
    52     36     41      1
    53     42     43      1
    54     42     47      1
    55     43     44      1
    56     43     48      1
    57     44     45      1
    58     44     49      1
    59     45     46      1
    60     45     50      1
    61     46     47      1
    62     46     51      1
    63     47     52      1
    64     53     54      1
    65     53     58      1
    66     54     55      1
    67     54     59      1
    68     55     56      1
    69     55     60      1
    70     56     57      1
    71     56     61      1
    72     57     58      1
    73     57     62      1
    74     58     63      1
    75     64     65      1
    76     64     69      1
    77     65     66      1
    78     65     70      1
    79     66     67      1
    80     66     71      1
    81     67     68      1
    82     67     72      1
    83     68     69      1
    84     68     73      1
    85     69     74      1
@<TRIPOS>SUBSTRUCTURE
      1 RES1       1

N14Ph4H_B3LYP_Def2_TZVP_-H_-1_Root1_TDDFT.mol
@<TRIPOS>MOLECULE
 MA excited state 1 (Ph4HN14HEPT,-1)
    75     85      1
 SMALL
 NO_CHARGES
 ****
 ****
@<TRIPOS>ATOM
     1  C    -9.3384    -2.8161    -0.1545  C.2   1 RES1    0.0000
     2  C    -9.2522    -1.4660    -0.5189  C.2   1 RES1    0.0000
     3  C   -10.2852    -0.9175    -1.2886  C.2   1 RES1    0.0000
     4  C   -11.3757    -1.6892    -1.6660  C.2   1 RES1    0.0000
     5  C   -11.4621    -3.0213    -1.2752  C.2   1 RES1    0.0000
     6  C   -10.4367    -3.5811    -0.5184  C.2   1 RES1    0.0000
     7  C    -8.0374    -0.6945    -0.1602  C.2   1 RES1    0.0000
     8  C    -8.0336     0.7088     0.1747  C.2   1 RES1    0.0000
     9  N    -6.8965     1.3794     0.2298  N.2   1 RES1    0.0000
    10  C    -5.7321     0.7158     0.0718  C.2   1 RES1    0.0000
    11  C    -5.7364    -0.7208    -0.0639  C.2   1 RES1    0.0000
    12  N    -6.9051    -1.3753    -0.2186  N.2   1 RES1    0.0000
    13  N    -4.6029    -1.4308    -0.0773  N.2   1 RES1    0.0000
    14  C    -3.4654    -0.7413    -0.0191  C.2   1 RES1    0.0000
    15  C    -3.4561     0.7199     0.0293  C.2   1 RES1    0.0000
    16  N    -4.5958     1.4152     0.0891  N.2   1 RES1    0.0000
    17  N    -2.3016    -1.4314    -0.0214  N.2   1 RES1    0.0000
    18  C    -1.2010    -0.7226    -0.0051  C.2   1 RES1    0.0000
    19  C    -1.1603     0.7316     0.0055  C.2   1 RES1    0.0000
    20  N    -2.3023     1.4151     0.0248  N.2   1 RES1    0.0000
    21  N     0.0000    -1.3705     0.0003  N.pl3 1 RES1    0.0000
    22  C     1.2010    -0.7226     0.0059  C.2   1 RES1    0.0000
    23  C     1.1603     0.7316    -0.0043  C.2   1 RES1    0.0000
    24  N     0.0000     1.4125     0.0007  N.2   1 RES1    0.0000
    25  N     2.3023     1.4152    -0.0236  N.2   1 RES1    0.0000
    26  C     3.4561     0.7199    -0.0284  C.2   1 RES1    0.0000
    27  C     3.4654    -0.7413     0.0198  C.2   1 RES1    0.0000
    28  N     2.3016    -1.4314     0.0219  N.2   1 RES1    0.0000
    29  N     4.5958     1.4153    -0.0882  N.2   1 RES1    0.0000
    30  C     5.7321     0.7159    -0.0712  C.2   1 RES1    0.0000
    31  C     5.7365    -0.7208     0.0643  C.2   1 RES1    0.0000
    32  N     4.6030    -1.4308     0.0777  N.2   1 RES1    0.0000
    33  N     6.8965     1.3794    -0.2296  N.2   1 RES1    0.0000
    34  C     8.0336     0.7089    -0.1748  C.2   1 RES1    0.0000
    35  C     8.0374    -0.6945     0.1601  C.2   1 RES1    0.0000
    36  N     6.9052    -1.3753     0.2187  N.2   1 RES1    0.0000
    37  C     9.2523    -1.4659     0.5186  C.2   1 RES1    0.0000
    38  C     9.3385    -2.8161     0.1542  C.2   1 RES1    0.0000
    39  C    10.4369    -3.5810     0.5179  C.2   1 RES1    0.0000
    40  C    11.4625    -3.0212     1.2744  C.2   1 RES1    0.0000
    41  C    11.3760    -1.6890     1.6652  C.2   1 RES1    0.0000
    42  C    10.2854    -0.9174     1.2880  C.2   1 RES1    0.0000
    43  C     9.2465     1.4892    -0.5243  C.2   1 RES1    0.0000
    44  C    10.2789     0.9535    -1.3030  C.2   1 RES1    0.0000
    45  C    11.3684     1.7317    -1.6707  C.2   1 RES1    0.0000
    46  C    11.4529     3.0587    -1.2627  C.2   1 RES1    0.0000
    47  C    10.4271     3.6060    -0.4975  C.2   1 RES1    0.0000
    48  C     9.3310     2.8338    -0.1414  C.2   1 RES1    0.0000
    49  C    -9.2466     1.4892     0.5239  C.2   1 RES1    0.0000
    50  C    -9.3310     2.8338     0.1409  C.2   1 RES1    0.0000
    51  C   -10.4272     3.6060     0.4967  C.2   1 RES1    0.0000
    52  C   -11.4533     3.0587     1.2615  C.2   1 RES1    0.0000
    53  C   -11.3689     1.7317     1.6696  C.2   1 RES1    0.0000
    54  C   -10.2793     0.9535     1.3023  C.2   1 RES1    0.0000
    55  H     8.5248    -3.2520    -0.4089  H     1 RES1    0.0000
    56  H    10.4900    -4.6201     0.2164  H     1 RES1    0.0000
    57  H    12.3166    -3.6206     1.5651  H     1 RES1    0.0000
    58  H    12.1585    -1.2486     2.2710  H     1 RES1    0.0000
    59  H    10.2275     0.1138     1.6077  H     1 RES1    0.0000
    60  H    10.2220    -0.0735    -1.6372  H     1 RES1    0.0000
    61  H    12.1507     1.3006    -2.2835  H     1 RES1    0.0000
    62  H    12.3052     3.6637    -1.5469  H     1 RES1    0.0000
    63  H    10.4778     4.6414    -0.1830  H     1 RES1    0.0000
    64  H     8.5175     3.2612     0.4286  H     1 RES1    0.0000
    65  H    -8.5173     3.2612    -0.4288  H     1 RES1    0.0000
    66  H   -10.4778     4.6414     0.1821  H     1 RES1    0.0000
    67  H   -12.3057     3.6638     1.5454  H     1 RES1    0.0000
    68  H   -12.1514     1.3007     2.2822  H     1 RES1    0.0000
    69  H   -10.2225    -0.0735     1.6365  H     1 RES1    0.0000
    70  H   -10.2272     0.1137    -1.6083  H     1 RES1    0.0000
    71  H   -12.1580    -1.2487    -2.2720  H     1 RES1    0.0000
    72  H   -12.3162    -3.6207    -1.5661  H     1 RES1    0.0000
    73  H   -10.4899    -4.6202    -0.2169  H     1 RES1    0.0000
    74  H    -8.5249    -3.2520     0.4088  H     1 RES1    0.0000
    75  H     0.0000    -2.3833     0.0001  H     1 RES1    0.0000
@<TRIPOS>BOND
     1      1      2      1
     2      1      6      1
     3      1     74      1
     4      2      3      1
     5      2      7      1
     6      3      4      1
     7      3     70      1
     8      4      5      1
     9      4     71      1
    10      5      6      1
    11      5     72      1
    12      6     73      1
    13      7      8      1
    14      7     12      1
    15      8      9      1
    16      8     49      1
    17      9     10      1
    18     10     11      1
    19     10     16      1
    20     11     12      1
    21     11     13      1
    22     13     14      1
    23     14     15      1
    24     14     17      1
    25     15     16      1
    26     15     20      1
    27     17     18      1
    28     18     19      1
    29     18     21      1
    30     19     20      1
    31     19     24      1
    32     21     22      1
    33     21     75      1
    34     22     23      1
    35     22     28      1
    36     23     24      1
    37     23     25      1
    38     25     26      1
    39     26     27      1
    40     26     29      1
    41     27     28      1
    42     27     32      1
    43     29     30      1
    44     30     31      1
    45     30     33      1
    46     31     32      1
    47     31     36      1
    48     33     34      1
    49     34     35      1
    50     34     43      1
    51     35     36      1
    52     35     37      1
    53     37     38      1
    54     37     42      1
    55     38     39      1
    56     38     55      1
    57     39     40      1
    58     39     56      1
    59     40     41      1
    60     40     57      1
    61     41     42      1
    62     41     58      1
    63     42     59      1
    64     43     44      1
    65     43     48      1
    66     44     45      1
    67     44     60      1
    68     45     46      1
    69     45     61      1
    70     46     47      1
    71     46     62      1
    72     47     48      1
    73     47     63      1
    74     48     64      1
    75     49     50      1
    76     49     54      1
    77     50     51      1
    78     50     65      1
    79     51     52      1
    80     51     66      1
    81     52     53      1
    82     52     67      1
    83     53     54      1
    84     53     68      1
    85     54     69      1
@<TRIPOS>SUBSTRUCTURE
      1 RES1       1
